# Supplementary material for: Systems Pharmacology Dissecting Holistic Medicine for Treatment of Complex Diseases: An Example Using Cardiocerebrovascular Diseases Treated by TCM
Source: Evid Based Complement Alternat Med. 2015 May 26;2015:980190. doi: 10.1155/2015/980190 (PMC4460250; doi:10.1155/2015/980190)
Supplement: Supplementary file 1 — Table S1 shows the structure information of 367 compounds in Xinnaoxin Pill. Table S2 and Table S3 respectively represents the information for construction PreHIA and PreAM model. Table S4 displays the detailed information of compound-target interactions. And Table S5 shows the information of the 218 targets in this study. Figure S1 and Figure S2 reveal the workflow for PreHIA and PreAM. [file 980190.f1.zip › mat.980190.v2/Table S1.xls]

## Sheet: Sheet1
Table S1. The structure information of 367 compounds
Herb Name	Compound Name (_DG represent deglycosylation compounds)	Compound SMILES Format
H. rhamnoides	1-heptacosene	C(CCCCCCCCCCCCC=C)CCCCCCCCCCCC
H. rhamnoides	1-hydroxyheptadecane	C(CCCCCCCCO)CCCCCCCC
H. rhamnoides	2,4-decadienal	O=C/C=C/C=C/CCCCC
H. rhamnoides	2,4-dimethyl-1,3-dioxane	O1[C@H](CCO[C@@H]1C)C
H. rhamnoides	2,6-dimethylheptane	C(CC(C)C)CC(C)C
H. rhamnoides	2,6-Ditert-butyl-4-methylphenol	Cc1cc(c(c(c1)C(C)(C)C)O)C(C)(C)C
H. rhamnoides	2-eicosenal	CCCCCCCCCCCCCCCCC/C=C/C=O
H. rhamnoides	2-methylhexane	C(CCCC)(C)C
H. rhamnoides	2-methylpentane	C(CCC)(C)C
H. rhamnoides	2-undecenal	O=C/C=C/CCCCCCCC
H. rhamnoides	3-methylcatechol	Cc1cccc(O)c1O
H. rhamnoides	3-pyridinol	Oc1cccnc1
H. rhamnoides	4,8-dimethyltridecane	[C@@H](CCC[C@@H](CCC)C)(CCCCC)C
H. rhamnoides	4-methylheptane	C(CCC)(CCC)C
H. rhamnoides	5-hydroxytryptamine	c12c([nH]cc1CCN)ccc(c2)O
H. rhamnoides	6-methyl-5-hepten-2-one	O=C(CCC=C(C)C)C
H. rhamnoides	9-octyl8-heptadecene	C(=CCCCCCCC)(CCCCCCCC)CCCCCCCC
H. rhamnoides	acetic acid	S(=O)(=O)(CC(=O)OCC)Cl
H. rhamnoides	alpha-acetylfuran	o1c(ccc1)C(=O)C
H. rhamnoides	alpha-Amyrenol	O[C@@H]1C([C@H]2[C@@]([C@@H]3[C@]([C@]4(C(=CC3)[C@H]3[C@@](CC4)(CC[C@H]([C@@H]3C)C)C)C)(CC2)C)(CC1)C)(C)C
H. rhamnoides	alpha-amyrin	O[C@@H]1C([C@H]2[C@@]([C@@H]3[C@]([C@]4(C(=CC3)[C@H]3[C@@](CC4)(CC[C@H]([C@@H]3C)C)C)C)(CC2)C)(CC1)C)(C)C
H. rhamnoides	alpha-elemene	[C@]1(CCC(=C(C)C)C=C1C(C)C)(C)C=C
H. rhamnoides	alpha-ionone	O=C(/C=C/[C@H]1C(CCC=C1C)(C)C)C
H. rhamnoides	alpha-pentylfuran	c1(ccco1)CCCCC
H. rhamnoides	alpha-tocopher	O1[C@](CCC[C@@H](CCC[C@@H](CCCC(C)C)C)C)(CCc2c1c(c(c(O)c2C)C)C)C
H. rhamnoides	anthocyanidin	OC1=C([O]=c2c(=C1)c(O)cc(O)c2)c1ccc(O)cc1
H. rhamnoides	aromadendrin	c12c(O[C@H]([C@@H](C1=O)O)c1ccc(cc1)O)cc(cc2O)O
H. rhamnoides	Ascorbicacid	O1[C@H]([C@@H](O)CO)C(=C(O)C1=O)OCC
H. rhamnoides	astragalin	O1[C@@H]([C@@H](O)[C@@H](O)[C@@H](O)[C@H]1Oc1c(oc2c(c1=O)c(O)cc(O)c2)c1ccc(O)cc1)CO
H. rhamnoides	astragalin_DG	Oc1c(oc2c(c1=O)c(O)cc(O)c2)c1ccc(O)cc1
H. rhamnoides	benzeneethanal	O=CCc1ccccc1
H. rhamnoides	benzylmethyl ether	O(Cc1ccccc1)C
H. rhamnoides	beta-Amyrin	O[C@@H]1C([C@H]2[C@@]([C@@H]3[C@]([C@]4(C(=CC3)[C@H]3[C@@](CC4)(CCC(C3)(C)C)C)C)(CC2)C)(CC1)C)(C)C
H. rhamnoides	beta-elemene	[C@@]1([C@@H](C[C@@H](CC1)C(=C)C)C(=C)C)(C)C=C
H. rhamnoides	beta-sitosterol-β-D-glucoside	O([C@@H]1CC2=CC[C@H]3[C@H]4[C@@]([C@H](CC4)[C@@H](CC[C@H](C(C)C)CC)C)(CC[C@@H]3[C@]2(CC1)C)C)[C@@H]1O[C@@H]([C@@H](O)[C@H](O)[C@H]1O)CO
H. rhamnoides	betaine	[N](CC(=O)O)(C)(C)C
H. rhamnoides	butanedioic acid	OC(=O)CCC(=O)O
H. rhamnoides	butanoic acid	OC(=O)CCC
H. rhamnoides	butyl isovalerate	O(CCCC)C(=O)CC(C)C
H. rhamnoides	caffeic acid	Oc1cc(ccc1O)/C=C/C(=O)O
H. rhamnoides	capraldehyde	CCCCCCCCCC=O
H. rhamnoides	catechin	[C@H]1(c2cc(c(cc2)O)O)Oc2c(C[C@@H]1O)c(cc(c2)O)O
H. rhamnoides	cholesteryl benzoate	O([C@@H]1CC2=CC[C@H]3[C@H]4[C@@]([C@H](CC4)[C@@H](CCCC(C)C)C)(CC[C@@H]3[C@]2(CC1)C)C)C(=O)c1ccccc1
H. rhamnoides	cianidanol	[C@H]1(c2cc(c(cc2)O)O)Oc2c(C[C@@H]1O)c(cc(c2)O)O
H. rhamnoides	citric acid	OC(CC(=O)O)(CC(=O)O)C(=O)O
H. rhamnoides	citronellal	O=CC[C@H](CCC=C(C)C)C
H. rhamnoides	coumarin	o1c(=O)ccc2ccccc12
H. rhamnoides	cryptoxanthin	O[C@@H]1CC(C(=C(C1)C)/C=C/C(=C/C=C/C(=C/C=C/C=C(/C=C/C=C(/C=C/C1=C(CCCC1(C)C)C)\C)\C)/C)/C)(C)C
H. rhamnoides	cyanidol	[O]1=C(c2cc(O)c(O)cc2)C(=Cc2c1cc(O)cc2O)O
H. rhamnoides	D-Galactose	[C@H]1([C@@H]([C@@H]([C@H]([C@H](O1)O)O)O)O)CO
H. rhamnoides	D-glucose	O=C[C@H](O)[C@@H](O)[C@H](O)[C@H](O)CO
H. rhamnoides	d-malic acid	O[C@H](CC(=O)O)C(=O)O
H. rhamnoides	D(+)-Xylose	[C@H]1([C@H]([C@H](OC[C@H]1O)O)O)O
H. rhamnoides	daucosterin	[C@H]12[C@H]3[C@@H]([C@@]4(C(=CC3)C[C@H](CC4)O[C@@H]3O[C@@H]([C@H]([C@@H]([C@H]3O)O)O)CO)C)CC[C@@]1([C@H](CC2)[C@@H](CC[C@H](C(C)C)CC)C)C
H. rhamnoides	decyl alcohol	C(CCCCC)CCCCO
H. rhamnoides	dehydroascorbic acid	O1[C@H]([C@@H](O)CO)C(=O)C(=O)C1=O
H. rhamnoides	Digitonide	O1[C@@H]2[C@@H]([C@@]3([C@H]([C@H]4[C@@H]([C@@]5([C@@H](CC4)C[C@@H](O[C@@H]4O[C@@H]([C@H](O[C@@H]6O[C@@H]([C@@H](O)[C@H](O[C@@H]7OC[C@@H](O)[C@H](O)[C@H]7O)[C@H]6O[C@@H]6O[C@@H]([C@@H](O)[C@H](O[C@@H]7O[C@@H]([C@@H](O)[C@H](O)[C@H]7O)CO)[C@H]6O)CO)CO)[C@H](O)[C@H]4O)CO)[C@H](O)C5)C)CC3)[C@@H]2O)C)[C@@H]([C@@]21OC[C@@H](CC2)C)C
H. rhamnoides	Digitonide_DG	O1[C@@H]2[C@@H]([C@@]3([C@H]([C@H]4[C@@H]([C@@]5([C@@H](CC4)C[C@@H](O)[C@H](O)C5)C)CC3)[C@@H]2O)C)[C@@H]([C@@]21OC[C@@H](CC2)C)C
H. rhamnoides	disulfamethyl ether	S(C)C
H. rhamnoides	dodecal	C(CCCCCC)CCCCC=O
H. rhamnoides	dodecane	C(CCCCCC)CCCCC
H. rhamnoides	e-2-decenal	O=C/C=C/CCCCCCC
H. rhamnoides	eicosal	C(CCCCCCCCCCCCC)CCCCCC=O
H. rhamnoides	eicosane	C(CCCCCCCCCC)CCCCCCCCC
H. rhamnoides	epicatechin	[C@@H]1([C@@H](O)Cc2c(O)cc(O)cc2O1)c1cc(O)c(O)cc1
H. rhamnoides	erythritol	[C@H]([C@H](CO)O)(CO)O
H. rhamnoides	ethyl acetate	O(CC)C(=O)C
H. rhamnoides	ethyl hexanoate	O(C(=O)CCCCC)CC
H. rhamnoides	ethyl palmitoate	O(C(=O)CCCCCCCCCCCCCCC)CC
H. rhamnoides	ethyl tetradecacarbonate	C(CCCCCCCCCCCC)C(=O)OCC
H. rhamnoides	flavane-3,4-diol	O1[C@@H]([C@H](O)[C@@H](O)c2c1cccc2)c1ccccc1
H. rhamnoides	flavone	o1c(c2ccccc2)cc(=O)c2c1cccc2
H. rhamnoides	fructose	O[C@H]([C@H](O)CO)[C@H](O)C(=O)CO
H. rhamnoides	furfural	o1c(ccc1)C=O
H. rhamnoides	galacturonic acid	O=C[C@H](O)[C@@H](O)[C@@H](O)[C@H](O)C(=O)O
H. rhamnoides	gamma-elemene	[C@@]1([C@@H](CC(=C(C)C)CC1)C(=C)C)(C)C=C
H. rhamnoides	geranyl acetone	O=C(CC/C=C(/CCC=C(C)C)\C)C
H. rhamnoides	glucofrangulin	c1(cc(cc2C(=O)c3cc(cc(c3C(=O)c12)O)C)O[C@H]1[C@H](O)[C@H](O)[C@@H](O)[C@@H](O1)C)O[C@H]1[C@H](O)[C@@H](O)[C@H](O)[C@H](O1)CO
H. rhamnoides	glucofrangulin_DG	c1(cc(cc2C(=O)c3cc(cc(c3C(=O)c12)O)C)O)O
H. rhamnoides	glycerol	C(CO)(CO)O
H. rhamnoides	hemin	OC(=O)CCc1/c/2=C/c3[nH]c(c(c3CCC(=O)O)C)/C=C/3\N=C(C(=C3C=C)C)/C=C/3\N=C(/C=c(\[nH]2)/c1C)C(=C3C=C)C
H. rhamnoides	heneicosane	C(CCCCCCCCCC)CCCCCCCCCC
H. rhamnoides	hentriacontane	C(CCCCCCCCCCCCCCC)CCCCCCCCCCCCCCC
H. rhamnoides	heptacosane	C(CCCCCCCCCCCCC)CCCCCCCCCCCCC
H. rhamnoides	heptadecal	C(CCCCCCCCCC)CCCCCC=O
H. rhamnoides	heptadecane	C(CCCCCCCC)CCCCCCCC
H. rhamnoides	heptadien-2,4-al	O=C/C=C\C=C\CC
H. rhamnoides	heptanal	C(CCC=O)CCC
H. rhamnoides	hexacosane	C(CCCCCCCCCCCCC)CCCCCCCCCCCC
H. rhamnoides	hexadecal	C(CCCCCCCCC)CCCCCC=O
H. rhamnoides	hexahydrofarnesyl acetone	O=C(CCC[C@H](CCC[C@@H](CCCC(C)C)C)C)C
H. rhamnoides	hexanoic acid	CCCCCC(=O)O
H. rhamnoides	hexeadecane	C(CCCCCCCC)CCCCCCC
H. rhamnoides	hippophaenin A	O1[C@H]([C@@H]2OC(=O)c3c(c4c(C(=O)O[C@H]2C(=O)O)cc(O)c(O)c4O)c(O)c(O)c(O)c3)[C@H](OC(=O)c2cc(O)c(O)c(O)c2)COC(=O)c2c(c3c(C1=O)cc(O)c(O)c3O)c(O)c(O)c(O)c2
H. rhamnoides	isobutyl octanoate	O(CC(C)C)C(=O)CCCCCCC
H. rhamnoides	isopentyl hexanoate	O(CCC(C)C)C(=O)CCCCC
H. rhamnoides	isopentyl isovalerate	O(CCC(C)C)C(=O)CC(C)C
H. rhamnoides	isopentyl octanoate	O(CCC(C)C)C(=O)CCCCCCC
H. rhamnoides	isorhamnetin	o1c(c2cc(OC)c(O)cc2)c(O)c(=O)c2c1cc(O)cc2O
H. rhamnoides	isorhamnetin-3-O-β-D-glucoside	O1[C@@H]([C@@H](O)[C@H](O)[C@@H](O)[C@H]1Oc1c(oc2c(c1=O)c(O)cc(O)c2)c1cc(OC)c(O)cc1)CO
H. rhamnoides	isorhamnetin-3-O-β-D-glucoside_DG	o1c(c(O)c(=O)c2c1cc(O)cc2O)c1cc(OC)c(O)cc1
H. rhamnoides	isorhamnetin-3-O-β-rutinoside	O1[C@@H]([C@@H](O)[C@@H](O)[C@@H](O)[C@H]1Oc1c(oc2c(c1=O)c(O)cc(O)c2)c1cc(OC)c(O)cc1)CO[C@H]1O[C@@H]([C@@H](O)[C@@H](O)[C@@H]1O)C
H. rhamnoides	isorhamnetin-3-O-β-rutinoside_DG	Oc1c(oc2c(c1=O)c(O)cc(O)c2)c1cc(OC)c(O)cc1
H. rhamnoides	isorhamnetin-3-O-galactoside	c1(c(c(=O)c2c(o1)cc(cc2O)O)O[C@H]1O[C@@H]([C@@H]([C@@H]([C@H]1O)O)O)CO)c1cc(c(cc1)O)OC
H. rhamnoides	isorhamnetin-3-O-galactoside_DG	c1(c(c(=O)c2c(o1)cc(cc2O)O)O)c1cc(c(O)cc1)OC
H. rhamnoides	kaempferol	o1c2c(c(=O)c(O)c1c1ccc(O)cc1)c(O)cc(O)c2
H. rhamnoides	kaempferol-3-glucoside	O1[C@@H]([C@@H](O)[C@@H](O)[C@@H](O)[C@H]1Oc1c(oc2c(c1=O)c(O)cc(O)c2)c1ccc(O)cc1)CO
H. rhamnoides	kaempferol-3-glucoside_DG	Oc1c(oc2c(c1=O)c(O)cc(O)c2)c1ccc(O)cc1
H. rhamnoides	l-malic acid	O[C@@H](CC(=O)O)C(=O)O
H. rhamnoides	lauric acid	OC(=O)CCCCCCCCCCC
H. rhamnoides	linalool cisoxide	O1C([C@H](O)CC[C@]1(C)C=C)(C)C
H. rhamnoides	linalool transoxide	O1[C@H](CC[C@@]1(C)C=C)C(O)(C)C
H. rhamnoides	malic acid	O[C@H](CC(=O)O)C(=O)O
H. rhamnoides	methyl palmitate	O(C(=O)CCCCCCCCCCCCCCC)C
H. rhamnoides	myricetin	c12c(c(=O)c(c(o1)c1cc(c(c(c1)O)O)O)O)c(cc(c2)O)O
H. rhamnoides	myristic acid	C(CCCCCCCC)CCCCC(=O)O
H. rhamnoides	n-undecanal	C(CCCCC=O)CCCCC
H. rhamnoides	nonacosane	C(CCCCCCCCCCCCCC)CCCCCCCCCCCCCC
H. rhamnoides	nonadecal	C(CCCCCCCCCCCC)CCCCCC=O
H. rhamnoides	nonadecane	C(CCCCCCCCC)CCCCCCCCC
H. rhamnoides	ocimene	C(=C\CC=C(C)C)(/C=C)\C
H. rhamnoides	octacosane	C(CCCCCCCCCCCCCC)CCCCCCCCCCCCC
H. rhamnoides	octadecal	C(CCCCCCCCCCC)CCCCCC=O
H. rhamnoides	octadecane	C(CCCCCCCCC)CCCCCCCC
H. rhamnoides	octanal	C(CCCC)CCC=O
H. rhamnoides	octanoic acid	OC(=O)CCCCCCC
H. rhamnoides	oxalic acid	OC(=O)C(=O)O
H. rhamnoides	p-cymene	C(c1ccc(cc1)C)(C)C
H. rhamnoides	palmitic acid	C(CCCCCCCCCC)CCCCC(=O)O
H. rhamnoides	pentadecal	C(CCCCCCCC)CCCCCC=O
H. rhamnoides	pentadecane	C(CCCCCCC)CCCCCCC
H. rhamnoides	pentyl hexanoate	C(=O)(OCCCCC)CCCCC
H. rhamnoides	phenethyl alcohol	OCCc1ccccc1
H. rhamnoides	phosphatide	Oc1c2c(C(=O)c3c(C2=O)c(O)ccc3)cc(c1)C(=O)O
H. rhamnoides	procyanidin	[C@]1(c2cc(c(cc2)O)O)(O[C@@H]2[C@H](c3cc(c(cc3)O)O)Oc3c(C2)c(cc(c3)O)O)Oc2c([C@@H]([C@@H]1O)O)c(cc(c2)O)O
H. rhamnoides	propelargonidin	O([C@]1([C@@H]([C@H](c2c(cc(cc2O1)O)O)O)O)c1ccc(cc1)O)[C@H]1[C@@H](Oc2c(C1)c(cc(c2)O)O)c1cc(c(cc1)O)O
H. rhamnoides	propyl isovalerate	C(C(=O)OCCC)C(C)C
H. rhamnoides	quassin	O1[C@H]2[C@@]3([C@@H]([C@@]4([C@@H](C2)[C@@H](C=C(OC)C4=O)C)C)C(=O)C(=C([C@@H]3CC1=O)C)OC)C
H. rhamnoides	quercetin	c12c(oc(c(c1=O)O)c1cc(c(cc1)O)O)cc(cc2O)O
H. rhamnoides	rutin	c1(c(c(=O)c2c(o1)cc(cc2O)O)O[C@@H]1O[C@H](CO[C@H]2[C@@H]([C@@H]([C@H]([C@@H](O2)C)O)O)O)[C@H]([C@@H]([C@H]1O)O)O)c1cc(c(cc1)O)O
H. rhamnoides	rutin_DG	c1(c(c(=O)c2c(o1)cc(cc2O)O)O)c1cc(c(cc1)O)O
H. rhamnoides	stearic acid	C(CCCCCCCCCCC)CCCCCC(=O)O
H. rhamnoides	succinic acid	C(=O)(O)CCC(=O)O
H. rhamnoides	sucrose	O1[C@@](O[C@H]2O[C@@H]([C@@H](O)[C@H](O)[C@H]2O)CO)([C@@H](O)[C@H](O)[C@H]1CO)CO
H. rhamnoides	tartaric acid	[C@H]([C@@H](C(=O)O)O)(C(=O)O)O
H. rhamnoides	tetradecal	C(CCCCCCC)CCCCCC=O
H. rhamnoides	tetradecane	C(CCCCCCC)CCCCCC
H. rhamnoides	triacontane	C(CCCCCCCCCCCCCCC)CCCCCCCCCCCCCC
H. rhamnoides	tridecanal	C(CCCCCC=O)CCCCCC
H. rhamnoides	tridecane	C(CCCCCC)CCCCCC
H. rhamnoides	vitamin A	OC/C=C(/C=C/C=C(/C=C\C1=C(CCCC1(C)C)C)\C)\C
H. rhamnoides	vitamin B1	s1c(c(n(Cc2c(nc(nc2)C)N)c1)C)CCO
H. rhamnoides	vitamin B2	O[C@@H](Cn1c2c(nc3c1nc(=O)[nH]c3=O)cc(c(c2)C)C)[C@H](O)[C@H](O)CO
H. rhamnoides	vitamin B6	c1(c(c(c(cn1)COP(=O)(O)O)C)O)C
H. rhamnoides	vitamin C	O1[C@H]([C@@H](O)CO)C(=C(O)C1=O)O
H. rhamnoides	vitamin E	O1[C@@](CCC[C@@H](CCC[C@@H](CCCC(C)C)C)C)(CCc2c1c(c(c(O)c2C)C)C)C
H. rhamnoides	vitamin E-alpha	c1(c(c(c2c(c1C)O[C@H]([C@H](C2)CCC[C@H](C)CCC[C@H](C)CCCC(C)C)C)C)O)C
H. rhamnoides	vitamin E-beta	c1c(c(c2c(c1C)O[C@H]([C@H](C2)CCC[C@H](C)CCC[C@H](C)CCCC(C)C)C)C)O
H. rhamnoides	vitamin E-delta	c1c(cc2c(c1C)O[C@H]([C@H](C2)CCC[C@H](C)CCC[C@H](C)CCCC(C)C)C)O
H. rhamnoides	vitamin E-gamma	c1(c(cc2c(c1C)O[C@H]([C@H](C2)CCC[C@H](C)CCC[C@H](C)CCCC(C)C)C)O)C
H. rhamnoides	vitamin K	O=C1C(=C(C(=O)c2c1cccc2)C)C/C=C(/CCC[C@H](CCC[C@@H](CCCC(C)C)C)C)\C
H. rhamnoides	vitamin P	c12c(O[C@H](CC1=O)c1cc(c(cc1)OC)O)cc(cc2O)O[C@@H]1O[C@@H]([C@H]([C@@H]([C@H]1O)O)O)CO[C@H]1[C@@H]([C@@H]([C@H]([C@@H](O1)C)O)O)O
H. rhamnoides	vitamin P_DG	c12c(O[C@H](CC1=O)c1cc(c(cc1)OC)O)cc(cc2O)O
H. rhamnoides	zeaxanthin	O[C@H]1CC(C(=C(C1)C)/C=C/C(=C/C=C/C(=C/C=C/C=C(/C=C/C=C(/C=C/C1=C(C[C@@H](O)CC1(C)C)C)\C)\C)/C)/C)(C)C
H. rhamnoides	Qercetin-3-O-galactoside	[C@H]1([C@@H]([C@H]([C@H]([C@H](O1)Oc1cc(c2c(c1)oc(c(c2=O)O[C@H]1O[C@@H]([C@@H]([C@@H]([C@H]1O)O)O)CO)c1ccc(c(c1)O)O)O)O)O)O)CO
H. rhamnoides	Qercetin-3-O-galactoside_DG	Oc1cc(c2c(c1)oc(c(c2=O)O)c1ccc(c(c1)O)O)O
H. rhamnoides	Isorhamnetin	c12c(oc(c(c1=O)O)c1cc(c(cc1)O)OC)cc(cc2O)O
H. rhamnoides	caulophyllogenin	[C@@]12([C@H](C3=CC[C@H]4[C@]([C@@]3(C[C@H]1O)C)(CC[C@@H]1[C@@]4(CC[C@@H]([C@]1(CO)C)O)C)C)CC(CC2)(C)C)C(=O)O
H. rhamnoides	(-)-epicatechin	[C@@H]1([C@@H](O)Cc2c(O)cc(O)cc2O1)c1cc(O)c(O)cc1
H. rhamnoides	Gallic acid monohydrate	C(=O)(c1cc(O)c(O)c(O)c1)O
H. rhamnoides	cyanidin chloride	[C@@H]1(c2cc(c(cc2)O)O)[O]([C@@H]2[C@H](C[C@H]1O)[C@@H](C[C@@H](C2)O)O)Cl
H. rhamnoides	Delphinidin chloride	[C@@H]1(c2cc(c(c(c2)O)O)O)[O]([C@@H]2[C@@H](C[C@H]1O)[C@@H](C[C@@H](C2)O)O)Cl
H. rhamnoides	Pelargonidin-3-glucoside chloride	[C@@H]1([C@@H](C[C@H]2[C@@H]([O]1Cl)C[C@H](C[C@H]2O)O)O[C@@H]1O[C@@H]([C@H]([C@@H]([C@H]1O)O)O)CO)c1ccc(cc1)O
H. rhamnoides	3-hydroxycinnamic acid	C(=O)(/C=C\c1cc(ccc1)O)O
H. rhamnoides	D-gamma-tocopherol	[C@@]1(CCc2c(O1)c(c(c(c2)O)C)C)(CCC[C@@H](CCC[C@@H](CCCC(C)C)C)C)C
L. chinense	11-decyldocosane	CCCCCCCCCCC(CCCCCCCCCCC)CCCCCCCCCC
L. chinense	12-O-Nicotinoylisolineolone	n1cccc(c1)C(=O)O[C@@H]1C[C@@H]2[C@](CC=C3[C@@]2(CC[C@@H](C3)O)C)(O)[C@@]2([C@]1([C@H](CC2)C(=O)C)C)O
L. chinense	12-decylheneicosane	CCCCCCCCCCC[C@@H](CCCCCCCCC)CCCCCCCCCC
L. chinense	13,17,21-trimethyltritriacontane	CCCCCCCCCCCC[C@@H](CCC[C@@H](CCC[C@@H](CCCCCCCCCCCC)C)C)C
L. chinense	14-Methyl-pentadecanoic acid,methyl ester	O(C(=O)CCCCCCCCCCCCC(C)C)C
L. chinense	17-pentatriacontene	CCCCCCCCCCCCCCCC/C=C/CCCCCCCCCCCCCCCCC
L. chinense	(1S-cis)-4,7-dimethyl-1-isopropyl-1,2,3,5,6,8a-hexahydronaphthalene	[C@@H]12C(=C(CC[C@H]1C(C)C)C)CCC(=C2)C
L. chinense	1,1,6-trimethyl-1,2-dihydro-naphthalen	C1(CC=Cc2cc(ccc12)C)(C)C
L. chinense	1,2,3,4,5-Pentamethyl-1,3-cyclopentadiene	C[C@H]1C(=C(C)C(=C1C)C)C
L. chinense	1,6-dibromhexan	BrCCCCCCBr
L. chinense	1,6-dimethyl-1-isopropyl-1,2,3,4,4a,7-hexahydronaphthalene	[C@@]1(CCC[C@@H]2C=C(CC=C12)C)(C(C)C)C
L. chinense	1,6-dimethyl-naphthalenediol	[C@@H]1(CCC[C@H]2C[C@H](CC[C@H]12)C)C
L. chinense	1-Chlorooctadecane	C(CCCCCCCCC)CCCCCCCCCl
L. chinense	1-dotriacontanol	C(CCCCCCCCCCCCCCCCCCCCCCCCCCCCCCC)O
L. chinense	1-Triacontanol	C(CCCCCCCCCCCCCCC)CCCCCCCCCCCCCCO
L. chinense	1-iodo-octadecan	C(CCCCCCCCC)CCCCCCCCI
L. chinense	(24R)-4alpha-Methyl-24-ethylcholesta-7,25-dien-3beta-ylacetate	C1[C@@H]([C@H]([C@@H]2[C@](C1)([C@@H]1C(=CC2)[C@]2([C@](CC1)([C@H](CC2)[C@@H](CC[C@H](C(=C)C)CC)C)C)C)C)C)OC(=O)C
L. chinense	2,21-dimethyldocosane	C(CCCCCCCCCC(C)C)CCCCCCCCC(C)C
L. chinense	2,3-dimethyl-naphthalenediol	C1[C@@H]([C@H](C[C@H]2CCCC[C@H]12)C)C
L. chinense	2,6,10,14-tetramethylpentadecane	CC(CCC[C@@H](CCC[C@@H](CCCC(C)C)C)C)C
L. chinense	2,6,10,15-tetramethylheptadecane	CC(CCC[C@@H](CCC[C@@H](CCCC[C@@H](CC)C)C)C)C
L. chinense	2,6,10-trimethyl-hexadecane	CC(CCC[C@@H](CCC[C@@H](CCCCCC)C)C)C
L. chinense	2,6,3-trimethyl-Dodecane	CC([C@H](CC[C@@H](CCCCCC)C)C)C
L. chinense	2,6-dimethyl-naphthalenediol	C1C[C@H](C[C@H]2CC[C@@H](C[C@H]12)C)C
L. chinense	(2-fluoro-2-methoxycyclopropyl)benzene	c1(ccccc1)[C@H]1[C@@](C1)(OC)F
L. chinense	2-methyl-5-ethyloctane	CC(CC[C@@H](CCC)CC)C
L. chinense	2-o-(beta-d-glucopyranosyl)-ascorbic acid	OC1=C(C(=O)O[C@@H]1[C@@H](O)CO)O[C@@H]1[C@H](O)[C@@H](O)[C@H](O)[C@H](O1)CO
L. chinense	2-o-(beta-d-glucopyranosyl)-ascorbic acid_DG	OC1=C(C(=O)O[C@@H]1[C@@H](O)CO)O
L. chinense	4,7-dimethyl-1-isopropyl-1,2,4a,5,6,8a-hexahydronaphthalene	[C@@H]12[C@H](CC=C([C@@H]1CCC(=C2)C)C)C(C)C
L. chinense	5-butylnonane	CCCCC(CCCC)CCCC
L. chinense	7-O-Methylluteolin-6-C-beta-glucoside	[C@H]1([C@H]([C@@H]([C@H]([C@H](O1)Oc1c(c2c(cc1OC)O[C@H](CC2=O)c1cc(c(cc1)O)O)O)O)O)O)CO
L. chinense	7-O-Methylluteolin-6-C-beta-glucoside_DG	Oc1c(c2c(cc1OC)O[C@H](CC2=O)c1cc(c(cc1)O)O)O
L. chinense	7-bromomethyl-7-hexadecene	CCCCCC/C(=C/CCCCCCCC)/CBr
L. chinense	9-Octadecyne	CCCCCCCCC#CCCCCCCCC
L. chinense	9-octylheptadecane	C(CCCCCCCC)(CCCCCCCC)CCCCCCCC
L. chinense	Anhydrorhodovibrin	O(C(C/C=C/C(=C/C=C/C(=C/C=C/C(=C/C=C/C=C(/C=C/C=C(/C=C/C=C(/CCC=C(C)C)\C)\C)\C)/C)/C)/C)(C)C)C
L. chinense	Ascorbicacid	C1(=C(C(=O)O[C@@H]1[C@@H](O)CO)O)O
L. chinense	Betaine	C(C(=O)O)[N](C)(C)C
L. chinense	Citric acid	C(=O)(O)CC(CC(=O)O)(O)C(=O)O
L. chinense	Citrulline	NC(=O)NCCC[C@@H](C(=O)O)N
L. chinense	Copaene	[C@]12([C@@H]3[C@@H]([C@H]1C(=CC3)C)[C@@H](CC2)C(C)C)C
L. chinense	Cyclofoetoside B	[C@@H]1([C@@H](OC[C@@H]([C@@H]1O)O)O[C@@H]1[C@]([C@H]2[C@]3(CC1)[C@]1([C@@H](CC2)[C@]2([C@](CC1)([C@H]([C@H](C2)O[C@@H]1O[C@@H]([C@H]([C@@H]([C@H]1O)O)O)CO[C@@H]1O[C@H]([C@@H]([C@H]([C@H]1O)O)O)C)[C@@H](CC[C@@H](C(C)(O)C)O)C)C)C)C3)(C)CO)O
L. chinense	Cyclofoetoside B_DG	O[C@@H]1[C@](C)(CO)[C@@H]2[C@@]3([C@@]4(C3)[C@@H](CC2)[C@]2([C@](C)(CC4)[C@H]([C@@H](O)C2)[C@@H](CC[C@@H](C(O)(C)C)O)C)C)CC1
L. chinense	(E,E)-6,10,14-trimethylpentadeca-5,9,13-trien-2-one	CC(=O)CC/C=C(/CC/C=C(/CCC=C(C)C)\C)\C
L. chinense	Ethyl 4-methylbenzoate	c1(C(=O)OCC)ccc(cc1)C
L. chinense	Glutamic acid	OC(=O)[C@H](N)CCC(=O)O
L. chinense	Glycitein	c1(c(cc2c(c1)occ(c2=O)c1ccc(cc1)O)OC)O
L. chinense	Hypaconitine	C1C[C@@]2([C@@H]3[C@@]4([C@@H]1OC)[C@@H]1[C@@H]5[C@@]([C@@H]([C@@H]3OC)[C@H]4N(C)C2)([C@H]([C@@H]([C@]([C@@H]5OC(=O)c2ccccc2)(C1)O)OC)O)OC(=O)C)COC
L. chinense	Ipolamiide	C1=C([C@]2([C@@H]([C@H](O1)O[C@H]1[C@@H]([C@H]([C@@H]([C@H](O1)CO)O)O)O)[C@@](CC2)(O)C)O)C(=O)OC
L. chinense	Ipolamiide_DG	C1=C([C@]2([C@@H]([C@H](O1)O)[C@@](CC2)(O)C)O)C(=O)OC
L. chinense	Lauric acid	C(CCCCCCCC)CCC(=O)O
L. chinense	Malic acid	C(=O)([C@@H](O)CC(=O)O)O
L. chinense	Methyl hexadecanoate	C(CCCCCCCCCCC)CCCC(=O)OC
L. chinense	Myristic acid	C(CCCCCCCC)CCCCC(=O)O
L. chinense	N-HENTRIACONTANE	C(CCCCCCCCCCCCCCC)CCCCCCCCCCCCCCC
L. chinense	N-HEPTADECANE	C(CCCCCCCC)CCCCCCCC
L. chinense	N-HEXADECANE-D34	C(CCCCCCCC)CCCCCCC
L. chinense	N-NONADECANE	C(CCCCCCCCC)CCCCCCCCC
L. chinense	N-PENTADECANE	C(CCCCCCC)CCCCCCC
L. chinense	N-TETRATETRACONTANE	C(CCCCCCCCCCCCCCCCCCCCCC)CCCCCCCCCCCCCCCCCCCCC
L. chinense	Normal-docosane	C(CCCCCCCCCCC)CCCCCCCCCC
L. chinense	Octadecane	C(CCCCCCCCC)CCCCCCCC
L. chinense	Oxalic acid	C(=O)(C(=O)O)O
L. chinense	Paeonol	c1(c(cc(cc1)OC)O)C(=O)C
L. chinense	Palmitic acid	C(CCCCCCCCCC)CCCCC(=O)O
L. chinense	Palmitic acid ethyl ester	C(CCCCCCCCCCCCC)CC(=O)OCC
L. chinense	Phenanthrene	c12c3c(ccc1cccc2)cccc3
L. chinense	Physcion-8-O-beta-D-gentiobioside_DG	c1(cc(c2c(c1)C(=O)c1c(C2=O)c(cc(c1)OC)O)O)C
L. chinense	Phytane	[C@H](CCC[C@@H](CCCC(C)C)C)(CCC[C@@H](CC)C)C
L. chinense	Scopolin	c12c(cc(c(c1)O[C@H]1O[C@@H]([C@@H]([C@H]([C@H]1O)O)O)CO)OC)ccc(=O)o2
L. chinense	Scopolin_DG	c12c(cc(c(c1)O)OC)ccc(=O)o2
L. chinense	Stigmasterol-beta-D-glucoside	C1[C@H](CC2=CC[C@@H]3[C@@H]([C@]2(C1)C)CC[C@]1([C@@H]3CC[C@@H]1[C@@H](C)/C=C/[C@@H](C(C)C)CC)C)O[C@@H]1O[C@@H]([C@H]([C@@H]([C@H]1O)O)O)CO
L. chinense	TRIACONTANE	C(CCCCCCCCCCCCCCC)CCCCCCCCCCCCCC
L. chinense	TR-saponin A	C1[C@@H]([C@@]([C@@H]2[C@](C1)([C@@H]1[C@@](CC2)([C@]2(C(=CC1)[C@H]1[C@@]([C@@H]([C@@H]2O)O)([C@H]([C@@H](C(C1)(C)C)OC(=O)/C(=C\C)/C)OC(=O)/C(=C\C)/C)CO)C)C)C)(C)C(=O)OC)O[C@@H]1O[C@@H]([C@H]([C@@H]([C@H]1O)O[C@@H]1OC[C@@H]([C@@H]([C@H]1O)O)O)O)C(=O)OC
L. chinense	TR-saponin A_DG	O[C@H]1CC[C@]2([C@@H]([C@@]1(C(=O)OC)C)CC[C@@]1([C@@H]2CC=C2[C@@]1(C)[C@@H](O)[C@@H](O)[C@@]1([C@@H]2CC(C)([C@H]([C@@H]1OC(=O)/C(=C\C)/C)OC(=O)/C(=C\C)/C)C)CO)C)C
L. chinense	Taurochenideixycholicacid	C1[C@H](C[C@@H]2[C@](C1)([C@@H]1[C@@H]([C@@H](C2)O)[C@@H]2[C@](CC1)([C@H](CC2)[C@@H](C)CCC(=O)NCCS(=O)(=O)O)C)C)O
L. chinense	Tetradecane	C(CCCCCCC)CCCCCC
L. chinense	Tetradecanoic acid,ethyl ester	O(C(=O)CCCCCCCCCCCCC)CC
L. chinense	Zederone	C1C[C@@]2([C@@H](C(=O)c3c(C/C(=C/1)/C)occ3C)O2)C
L. chinense	aminoethyl thiosulfite	[S@](=S)(OCCN)O
L. chinense	asparagine	OC(=O)[C@@H](N)CC(=O)N
L. chinense	beta-Amyrin	C1[C@@H](C([C@H]2[C@](C1)([C@@H]1[C@@](CC2)([C@]2(C(=CC1)[C@@H]1[C@@](CC2)(CCC(C1)(C)C)C)C)C)C)(C)C)O
L. chinense	beta-ionone	O=C(/C=C/C1=C(CCCC1(C)C)C)C
L. chinense	cryptoxanthin	O[C@@H]1CC(C(=C(C1)C)/C=C/C(=C/C=C/C(=C/C=C/C=C(/C=C/C=C(/C=C/C1=C(CCCC1(C)C)C)\C)\C)/C)/C)(C)C
L. chinense	daucosterol	[C@]12([C@H]([C@@H]3[C@@H]([C@]4(C(=CC3)C[C@H](O[C@H]3[C@@H]([C@H]([C@@H]([C@H](O3)CO)O)O)O)CC4)C)CC2)CC[C@H]1[C@@H](CC[C@@H](C(C)C)CC)C)C
L. chinense	ethyl anisate	O(C(=O)c1ccc(OC)cc1)CC
L. chinense	gamma-Aminobutyricacid	C(N)CCC(=O)O
L. chinense	glutamine	OC(=O)[C@H](N)CCC(=O)N
L. chinense	mutatoxanthin	C1(=C(C[C@H](CC1(C)C)O)C)/C=C\C(=C\C=C\C(=C\C=C\C=C(\C=C\C=C(/C)\[C@@H]1C=C2[C@H](C[C@@H](CC2(C)C)O)O1)/C)\C)\C
L. chinense	n-Henicosane	C(CCCCCCCCCC)CCCCCCCCCC
L. chinense	n-Icosan	C(CCCCCCCCCC)CCCCCCCCC
L. chinense	n-Octacosane	C(CCCCCCCCCCCCCC)CCCCCCCCCCCCC
L. chinense	noncosane	C(CCCCCCCCCCCCCC)CCCCCCCCCCCCCC
L. chinense	p-Nitrobenzoic acid octadecyl ester	C(=O)(c1ccc(cc1)[N](=O)O)OCCCCCCCCCCCCCCCCCC
L. chinense	p-coumaric acid	OC(=O)/C=C\c1ccc(O)cc1
L. chinense	pentadecanoic acid	OC(=O)CCCCCCCCCCCCCC
L. chinense	rutin	C[C@@H]1O[C@@H](OC[C@H]2O[C@H](Oc3c(oc4cc(O)cc(O)c4c3=O)c3ccc(O)c(O)c3)[C@H](O)[C@@H](O)[C@@H]2O)[C@H](O)[C@@H](O)[C@@H]1O
L. chinense	rutin_DG	Oc1c(oc2cc(O)cc(O)c2c1=O)c1ccc(O)c(O)c1
L. chinense	scopoletin	c12c(cc(c(c1)OC)O)oc(=O)cc2
L. chinense	taurine	S(=O)(=O)(O)CCN
L. chinense	zeaxanthin	O[C@H]1CC(C(=C(C1)C)/C=C/C(=C/C=C/C(=C/C=C/C=C(/C=C/C=C(/C=C/C1=C(C[C@@H](O)CC1(C)C)C)\C)\C)/C)/C)(C)C
L. chinense	Kaempferol	c12c(oc(c(c1=O)O)c1ccc(cc1)O)cc(cc2O)O
L. chinense	quercetin	c12c(oc(c(c1=O)O)c1cc(c(cc1)O)O)cc(cc2O)O
L. chinense	myricetin	c12c(c(=O)c(c(o1)c1cc(c(c(c1)O)O)O)O)c(cc(c2)O)O
L. chinense	taurine	C(S(=O)(=O)O)CN
L. chinense	Isoquercitrin	c1(c(c(=O)c2c(o1)cc(cc2O)O)O[C@@H]1O[C@@H]([C@H]([C@@H]([C@H]1O)O)O)CO)c1cc(c(cc1)O)O
L. chinense	Luteolin	c12c(c(=O)cc(o1)c1cc(c(cc1)O)O)c(cc(c2)O)O
R. rosea	(-)-epigallocatechin gallate	[C@H]1([C@H](Cc2c(O1)cc(cc2O)O)OC(=O)c1cc(c(c(c1)O)O)O)c1cc(c(c(c1)O)O)O
R. rosea	1-hexadecene	C=CCCCCCCCCCCCCCC
R. rosea	1-octadecene	C(CCCCCCCC=C)CCCCCCCC
R. rosea	2-hydroxy-cyclopentadecanone	C1(=O)[C@H](CCCCCCCCCCCCC1)O
R. rosea	2-methyl-3-buten-2-ol	C(C=C)(C)(C)O
R. rosea	3,4-Dihydroxybenzoic acid	c1(cc(c(cc1)O)O)C(=O)O
R. rosea	4,6-Dimethyl dodecane	CCC[C@@H](C[C@@H](CCCCCC)C)C
R. rosea	4-Hydroxy-3-methoxycinnamic acid	c1(cc(c(cc1)O)OC)/C=C/C(=O)O
R. rosea	5-Ethyl-2-methylheptane	CC(CCC(CC)CC)C
R. rosea	5-hepten-2-ol,6-methyl	C(=CCC[C@@H](C)O)(C)C
R. rosea	6-methyl-5-hepten-2-one	C(=CCCC(=O)C)(C)C
R. rosea	arbutin	[C@H]1(O[C@H]([C@H]([C@H]([C@@H]1O)O)O)CO)Oc1ccc(cc1)O
R. rosea	arbutin_DG	Oc1ccc(O)cc1
R. rosea	bakuchiol	[C@@](/C=C\c1ccc(cc1)O)(CCC=C(C)C)(C=C)C
R. rosea	bergenin	c12[C@H]3[C@H](OC(=O)c1cc(c(c2O)OC)O)[C@H]([C@@H]([C@H](O3)CO)O)O
R. rosea	beta-Elemene	[C@@H]1([C@@](CC[C@H](C1)C(=C)C)(C=C)C)C(=C)C
R. rosea	caffeic acid	c1(cc(c(cc1)O)O)/C=C/C(=O)O
R. rosea	capryl alcohol	C(CCCC)CCCO
R. rosea	cinnamic acid	C(=O)(/C=C/c1ccccc1)O
R. rosea	cis-linaloloxide	C1([C@@H](O1)CC[C@@](C=C)(C)O)(C)C
R. rosea	coumarin	o1c(=O)ccc2ccccc12
R. rosea	cyclodecane	C1CCCCCCCCC1
R. rosea	Dendrolasin	o1cc(cc1)CC/C=C(/CCC=C(C)C)\C
R. rosea	di-n-decyl ether	O(CCCCCCCCCC)CCCCCCCCCC
R. rosea	DL-proline	[C@@H]1(C(=O)O)CCCN1
R. rosea	DL-serine	[C@H](C(=O)O)(CO)N
R. rosea	docosane	C(CCCCCCCCCCC)CCCCCCCCCC
R. rosea	eleutheroside A	[C@H]12[C@H]3[C@@H]([C@@]4(C(=CC3)C[C@H](CC4)O[C@@H]3O[C@@H]([C@H]([C@@H]([C@H]3O)O)O)CO)C)CC[C@@]1([C@H](CC2)[C@@H](CC[C@H](C(C)C)CC)C)C
R. rosea	Gallic acid	c1(cc(c(c(c1)O)O)O)C(=O)O
R. rosea	geranial	O=C/C=C(/C)\CCC=C(C)C
R. rosea	geraniol	C(=C\CO)(/CCC=C(C)C)\C
R. rosea	glycerite	[C@H]1([C@H]([C@H](O[C@H]([C@H]1OC(=O)c1cc(c(c(c1)O)O)OC(=O)c1cc(c(c(c1)O)O)O)COC(=O)c1cc(OC(=O)c2cc(c(c(c2)O)O)O)c(c(c1)O)O)OC(=O)c1cc(c(c(c1)O)O)OC(=O)c1cc(c(c(c1)O)O)O)OC(=O)c1cc(c(c(c1)O)O)OC(=O)c1cc(c(c(c1)O)O)O)OC(=O)c1cc(c(c(c1)O)O)OC(=O)c1cc(c(c(c1)O)O)O
R. rosea	gossypetin	c12c(c(=O)c(c(o1)c1cc(c(cc1)O)O)O)c(cc(c2O)O)O
R. rosea	heneicosane	C(CCCCCCCCCC)CCCCCCCCCC
R. rosea	heptadecane	C(CCCCCCCC)CCCCCCCC
R. rosea	heterodendrin	C(#N)[C@H](C(C)C)O[C@@H]1O[C@@H]([C@@H]([C@@H]([C@H]1O)O)O)CO
R. rosea	hexadecanoic acid	C(CCCCCCCCCC)CCCCC(=O)O
R. rosea	kaempferol	c12c(oc(c(c1=O)O)c1ccc(cc1)O)cc(cc2O)O
R. rosea	L-glutamic acid	[C@H](CCC(=O)O)(C(=O)O)N
R. rosea	lignoceric acid methyl ester	C(CCCCCCCCCCCCCCCCC)CCCCCC(=O)OC
R. rosea	linalool	[C@@](CC[C@@H]1C(C)(C)O1)(C=C)(C)O
R. rosea	linoleic acid	C(C/C=C\C/C=C\CCCCC)CCCCCC(=O)O
R. rosea	L-lysine	C(=O)([C@@H](N)CCCCN)O
R. rosea	lotaustrlin	[C@H]1(O[C@@H]([C@H]([C@@H]([C@H]1O)O)O)CO)O[C@@](CC)(C#N)C
R. rosea	lotaustrlin_DG	O[C@@](CC)(C#N)C
R. rosea	L-threonine	[C@@H]([C@H](C)O)(C(=O)O)N
R. rosea	Methyl hexadecanoate	C(CCCCCCCCCCC)CCCC(=O)OC
R. rosea	Myristic acid	C(CCCCCCCC)CCCCC(=O)O
R. rosea	n-heneicosane	C(CCCCCCCCCC)CCCCCCCCCC
R. rosea	n-heptadecane	C(CCCCCCCC)CCCCCCCC
R. rosea	N-hexanol	C(CCC)CCO
R. rosea	N-octanal	C(CCCC)CCC=O
R. rosea	N-octanol	C(CCCC)CCCO
R. rosea	nonanoic acid	C(CCCCC)CCC(=O)O
R. rosea	octanoic acid	C(CCCCC)CC(=O)O
R. rosea	pentadecanoic acid	C(CCCCCCCC)CCCCCC(=O)O
R. rosea	perilla alcohol	[C@@H]1(CCC(=CC1)CO)C(=C)C
R. rosea	quercetin dihydrate	c1(c(O)c(=O)c2c(O)cc(O)cc2o1)c1cc(O)c(O)cc1
R. rosea	rhodalgin	c1(c(c(=O)c2c(o1)c(c(cc2O)O)O[C@H]1[C@H](O)[C@@H](O)[C@@H](O)CO1)O)c1ccc(cc1)O
R. rosea	rhodiolgidin	c1(c(c(=O)c2c(o1)c(c(cc2O)O[C@H]1[C@H](O)[C@H](O)[C@@H](O)[C@@H](O1)C)O[C@H]1[C@H](O)[C@@H](O)[C@H](O)[C@H](O1)CO)O)c1cc(c(cc1)O)O
R. rosea	rhodiolgin	c1(c(c(=O)c2c(o1)c(c(cc2O)O[C@H]1[C@H](O)[C@H](O)[C@@H](O)[C@@H](O1)C)O)O)c1cc(c(cc1)O)O
R. rosea	rhodionidin	c1(c(c(=O)c2c(o1)c(c(cc2O)O[C@H]1[C@H](O)[C@H](O)[C@@H](O)[C@@H](O1)C)O[C@H]1[C@H](O)[C@@H](O)[C@H](O)[C@H](O1)CO)O)c1ccc(cc1)O
R. rosea	rhodionin	c1c(c(c2c(c1O)c(=O)c(c(o2)c1ccc(cc1)O)O)O)O[C@@H]1O[C@H]([C@@H]([C@H]([C@H]1O)O)O)C
R. rosea	rhodiooctanoside	O([C@H]1[C@H](O)[C@@H](O)[C@H](O)[C@H](O1)CO[C@H]1[C@H](O)[C@@H](O)[C@@H](O)CO1)CCCCCCCC
R. rosea	rhodiosin	c12c(c(=O)c(c(o1)c1ccc(cc1)O)O)c(cc(c2O)O[C@H]1[C@@H]([C@H](O[C@@H]2O[C@@H]([C@H]([C@@H]([C@H]2O)O)O)CO)[C@H]([C@@H](O1)C)O)O)O
R. rosea	rhodiosin_DG	c12c(c(=O)c(c(o1)c1ccc(cc1)O)O)c(cc(c2O)O)O
R. rosea	rodalgin	c1(c(c(=O)c2c(o1)c(c(cc2O)O)O[C@H]1[C@H](O)[C@@H](O)[C@@H](O)CO1)O)c1ccc(cc1)O
R. rosea	rosarin	[C@@H]1(O[C@H]([C@@H]([C@H]([C@@H]1O)O)O)OC/C=C/c1ccccc1)CO[C@@H]1O[C@H]([C@H]([C@H]1O)O)CO
R. rosea	rosavin	[C@@H]1(O[C@H]([C@@H]([C@H]([C@@H]1O)O)O)OC/C=C/c1ccccc1)CO[C@H]1[C@@H]([C@H]([C@H](CO1)O)O)O
R. rosea	rosavin_DG	OC/C=C/c1ccccc1
R. rosea	rosiridin	[C@H]1([C@H]([C@@H]([C@H]([C@@H](O1)OC/C=C(/[C@@H](CC=C(C)C)O)\C)O)O)O)CO
R. rosea	rosiridin_DG	OC/C=C(/[C@@H](CC=C(C)C)O)\C
R. rosea	rutin	c1(c(c(=O)c2c(o1)cc(cc2O)O)O[C@@H]1O[C@H](CO[C@H]2[C@@H]([C@@H]([C@H]([C@@H](O2)C)O)O)O)[C@H]([C@@H]([C@H]1O)O)O)c1cc(c(cc1)O)O
R. rosea	rutin_DG	c1(c(c(=O)c2c(o1)cc(cc2O)O)O)c1cc(c(cc1)O)O
R. rosea	scopoletin	c12c(cc(c(c1)OC)O)oc(=O)cc2
R. rosea	sedoheptulose anhydride	[C@@]12([C@H]([C@@H]([C@@H]([C@H](O1)CO2)O)O)O)CO
R. rosea	skimmin	c12c(cc(cc1)O[C@@H]1O[C@@H]([C@H]([C@@H]([C@H]1O)O)O)CO)oc(=O)cc2
R. rosea	skimmin_DG	c12c(cc(cc1)O)oc(=O)cc2
R. rosea	tetradecanoic acid	C(CCCCCCCC)CCCCC(=O)O
R. rosea	trans-4-hydroxycinnamic acid	C(=O)(/C=C/c1ccc(cc1)O)O
R. rosea	tricin	c12c(oc(cc1=O)c1cc(c(c(c1)OC)O)OC)cc(cc2O)O
R. rosea	tyrosol	c1(ccc(cc1)O)CCO
R. rosea	umbelliferone	c12c(cc(cc1)O)oc(=O)cc2
R. rosea	Z-citral	C(=O)/C=C(\CCC=C(C)C)/C
R. rosea	Salidroside	[C@H]1(O[C@H]([C@H]([C@H]([C@@H]1O)O)O)CO)OCCc1ccc(cc1)O
