# Supplementary material for: Systems Pharmacology Dissecting Holistic Medicine for Treatment of Complex Diseases: An Example Using Cardiocerebrovascular Diseases Treated by TCM
Source: Evid Based Complement Alternat Med. 2015 May 26;2015:980190. doi: 10.1155/2015/980190 (PMC4460250; doi:10.1155/2015/980190)
Supplement: Supplementary file 1 — Table S1 shows the structure information of 367 compounds in Xinnaoxin Pill. Table S2 and Table S3 respectively represents the information for construction PreHIA and PreAM model. Table S4 displays the detailed information of compound-target interactions. And Table S5 shows the information of the 218 targets in this study. Figure S1 and Figure S2 reveal the workflow for PreHIA and PreAM. [file 980190.f1.zip › mat.980190.v2/Table S2.xls]

## Sheet: HIA values and classes
Table S2. The information of PreHIA.
Drug Name	HIA(Human Intestinal Absorption)	Class(High: HIA value ≥0.7; Low: HIA value < 0.7)
AAFC(R)	0.32	Low
AAFC(S)	0.32	Low
Acamprosate	0.11	Low
Acarbose	0.02	Low
Acebutolol(R)	0.85	High
Acebutolol(S)	0.85	High
Acetaminophen	0.85	High
Acetanilide	1	High
Acetazolamide	1	High
Acetohexamide	0.8	High
Acipimox	0.95	High
Acitretin	0.95	High
Acrivastine	0.88	High
Albuterol(R)	0.83	High
Albuterol(S)	0.83	High
Alendronic Acid	0.01	Low
Alfacalcidol	1	High
Allopurinol	0.8	High
Almitrine	0.9	High
Almotriptan	0.75	High
Alprazolam	0.9	High
Alprenolol(R)	0.93	High
Alprenolol(S)	0.93	High
Amantadine	0.9	High
Amikacin	0.01	Low
Amiloride	0.5	Low
Aminoglutethimide(R)	1	High
Aminoglutethimide(S)	1	High
Aminopyrine	1	High
Amitriptyline	0.95	High
Amobarbital	0.95	High
Amosulalol(R)	1	High
Amosulalol(S)	1	High
Amoxapine	0.95	High
Amoxicillin	0.935	High
Amphetamine(R)	0.9	High
Amphetamine(S)	0.9	High
Amphotericin_B	0.03	Low
Ampicillin	0.62	Low
Amrinone	0.93	High
Amygdalin(R)	0.05	Low
Amygdalin(S)	0.05	Low
Anagrelide	0.7	High
Anastrozole	1	High
Antipyrine	0.97	High
Arbekacin	0.01	Low
Ascorbic_acid	0.35	Low
Aspirin	0.82	High
Astemizole	1	High
Atenolol	0.5	Low
Atropine(R)	0.94	High
Atropine(S)	0.94	High
Azatadine	0.9	High
Azelastine	1	High
Azimilide	1	High
Azosemide	0.1	Low
Aztreonam	0.01	Low
Baclofen(R)	0.95	High
Baclofen(S)	0.95	High
Bendroflumethiazide	1	High
Benorylate	1	High
Benserazide(R)	0.7	High
Benserazide(S)	0.7	High
Benzbromarone	0.73	High
Benzydamine	0.87	High
Bephenium	0.05	Low
Bepridil	1	High
Betahistine	1	High
Betaxolol	0.9	High
Bethanechol	0.05	Low
Bezafibrate	1	High
Bicalutamide	0.9	High
Bifemelane	0.95	High
Biperiden	1	High
Bisoprolol(R)	0.9	High
Bisoprolol(S)	0.9	High
Bornaprine	1	High
Bretylium	0.23	Low
Bromazepam	0.84	High
Bromhexine	0.7	High
Budesonide	1	High
Bumetanide	0.96	High
Bupropion(R)	0.87	High
Bupropion(S)	0.87	High
Buspirone	1	High
Butylscopolamine	0.1	Low
Caffeine	0.99	High
Camazepam(R)	1	High
Camazepam(S)	1	High
Capecitabine	0.96	High
Captopril	0.67	Low
Carbamazepine	1	High
Carbimazole	0.95	High
Carfecillin(R)	0.99	High
Carfecillin(S)	0.99	High
Carmustine	1	High
Carnitine	0.1	Low
Carteolol(R)	0.95	High
Carteolol(S)	0.95	High
Carvedilol(R)	0.8	High
Carvedilol(S)	0.8	High
Cefadroxil	1	High
Cefatrizine	0.76	High
Cefmetazole	0.1	Low
Cefotaxime	0.05	Low
Cefpodoxime_proxetil	0.5	Low
Ceftizoxime	0.72	High
Ceftriaxone	1	High
Cefuroxime	1	High
Cefuroximeaxetil(R)	0.36	Low
Cefuroximeaxetil(S)	0.36	Low
Cephalexin	1	High
Cephradine	0.95	High
Chloral_hydrate	1	High
Chlorambucil	1	High
Chloramphenicol	0.9	High
Chlordiazepoxide	0.99	High
Chlorguanide	0.85	High
Chlorhexidine	0.05	Low
Chloroform	1	High
Chloroquine	1	High
Chlorothiazide	0.49	Low
Chlorphenesin(R)	1	High
Chlorphenesin(S)	1	High
Chlorpheniramine	0.8	High
Chlorpromazine	0.98	High
Chlorthalidone(R)	0.65	Low
Chlorthalidone(S)	0.65	Low
Chlorzoxazone	0.9	High
Chorpropamide	0.95	High
Cicaprost	1	High
Cilazapril	0.59	Low
Cilazaprilat	0.2	Low
Cilomilast	1	High
Cimetidine	0.64	Low
Cinchonine	1	High
Cinoxacin	0.95	High
Ciprofibrate(R)	0.99	High
Ciprofibrate(S)	0.99	High
Ciprofloxacin	0.69	Low
Cisapride	1	High
Citalopram(R)	1	High
Citalopram(S)	1	High
Clavulanic_acid	0.75	High
Clindamycin	0.87	High
Clobazam	0.87	High
Clodronate	0.03	Low
Clofibrate	0.97	High
Clomethiazole	0.95	High
Clomipramine	0.95	High
Clonazepam	0.8	High
Clonidine	0.95	High
Clopenthixol	0.95	High
Clopidogrel(R)	0.5	Low
Clopidogrel(S)	0.5	Low
Clozapine	0.94	High
Codeine	0.93	High
Corticosterone	1	High
Cotinine(R)	0.97	High
Cotinine(S)	0.97	High
Coumarin	1	High
Cyclopenthiazide(R)	1	High
Cyclopenthiazide(S)	1	High
Cycloserine	0.73	High
Cymarin	0.47	Low
Cyproheptadine	0.8	High
Cyproterone_acetate	0.98	High
Dantrolene	0.8	High
Dapsone	0.9	High
Daunorubicin	0.1	Low
Delmopinol(R)	0.95	High
Delmopinol(S)	0.95	High
Desipramine	1	High
Desogestrel	0.72	High
Dexamethasone	0.8	High
Dextromoramide	1	High
Diacetylmorphine	1	High
Diatrizoate	0.05	Low
Diazepam	1	High
Diazoxide	0.9	High
Diclofenac	0.97	High
Dicyclomine	1	High
Dienogest	0.94	High
Diethylpropion(R)	0.95	High
Diethylpropion(S)	0.95	High
Diethylstilbestrol	0.9	High
Diflunisal	0.9	High
Dihydrocodeine	0.88	High
Dihydroergotamine	0.35	Low
Diloxanide	0.9	High
Diltiazem	0.91	High
Diphemanil	0.07	Low
Dipyridamole	0.58	Low
Disopyramide	0.95	High
Disulfiram	0.97	High
Dofetilide	1	High
Dolasetron	0.85	High
Domperidone	0.95	High
Dothiepin	0.95	High
Doxazosin(R)	1	High
Doxazosin(S)	1	High
Doxepin	1	High
Doxorubicin	0.12	Low
Edetic_acid	0.05	Low
Eflornithine(R)	0.55	Low
Eflornithine(S)	0.55	Low
Enalapril	0.66	Low
Enalaprilat	0.25	Low
Enoximone	0.8	High
Ergotamine	1	High
Erythromycin	0.35	Low
Estramustine	0.75	High
Ethacrynic_acid	0.9	High
Ethambutol	0.8	High
Ethionamide	0.9	High
Ethyl_alcohol	1	High
Ethylmorphine	0.77	High
Ethynodiol_diacetate	1	High
Ethynylestradiol	1	High
Etidronate	0.05	Low
Etodolac	0.7	High
Etoposide	0.5	Low
Etoricoxib	1	High
Famciclovir	0.77	High
Famotidine	0.28	Low
Felbamate	0.9	High
Felodipine(R)	0.94	High
Felodipine(S)	0.94	High
Fenclofenac	1	High
Fenfluramine(R)	0.95	High
Fenfluramine(S)	0.95	High
Fenoprofen(R)	0.85	High
Fenoprofen(S)	0.85	High
Fenoterol	0.6	Low
Feprazone	0.9	High
Finasteride	1	High
Flecainide(R)	0.81	High
Flecainide(S)	0.81	High
Floxacillin	0.8	High
Fluconazole	0.95	High
Flucytosine	1	High
Fludrocortisone_acetate	0.95	High
Flumazenil	0.95	High
Flumenethyl	0.95	High
Flunarizine	0.8	High
Flunisolide	0.8	High
Fluorescein	0.99	High
Fluoxetine	0.8	High
Flupentixol	1	High
Flurazepam	1	High
Flurbiprofen(R)	0.95	High
Flurbiprofen(S)	0.95	High
Flutamide	0.9	High
Fluvastatin	1	High
Fluvoxamine	0.9	High
Foscarnet	0.17	Low
Fosfomycin	0.31	Low
Fosmidomycin	0.3	Low
Furosemide	0.61	Low
Fusidic_acid	1	High
Gabapentin	0.59	Low
Galantamine	0.95	High
Gallamine_triethiodide	0.05	Low
Gallopamil(R)	0.97	High
Gallopamil(S)	0.97	High
Ganciclovir	0.038	Low
Gatifloxacin(R)	0.96	High
Gatifloxacin(S)	0.96	High
Gemfibrozil	1	High
Genaconazole	1	High
GentamicinC2(R)	0.01	Low
GentamicinC2(S)	0.01	Low
Gestodene	1	High
Glibornuride	0.98	High
Gliclazide	0.65	Low
Glimepiride	1	High
Glipizide	1	High
Gliquidone	0.95	High
Glyburide	1	High
Glycine	1	High
Glycopyrrolate	0.18	Low
Glymidine	0.95	High
Granisetron	1	High
Guanabenz	0.8	High
Guanadrel(R)	0.8	High
Guanadrel(S)	0.8	High
Guanfacine	1	High
Guanoxan(R)	0.5	Low
Guanoxan(S)	0.5	Low
Haloperidol	1	High
Hexobarbital	0.95	High
Hydralazine	1	High
Hydrochlorothiazide	0.69	Low
Hydrocortisone	0.91	High
Hydroflumethiazide	0.67	Low
Hydroxychloroquine(R)	0.9	High
Hydroxychloroquine(S)	0.9	High
Hydroxyprogesterone_caproate	0.9	High
Ibuprofen(R)	0.98	High
Ibuprofen(S)	0.98	High
Ibutilide(R)	0.82	High
Ibutilide(S)	0.82	High
Imatinib	0.98	High
Imipenem	0.05	Low
Imipramine	1	High
Indobufen(R)	1	High
Indobufen(S)	1	High
Indomethacin	1	High
Indoprofen	1	High
Iohexol	0.05	Low
Iotroxic_acid	0.05	Low
Ipratropium	0.05	Low
Irbesartan	1	High
Isocarboxazid	0.7	High
Isoniazid	0.8	High
Isoproterenol(R)	0.85	High
Isoproterenol(S)	0.85	High
Isosorbide-2-mononitrate	0.9	High
Isosorbide_dinitrate	1	High
Isotretinoin	0.9	High
Isoxepac	0.98	High
Isoxicam	1	High
Isradipine(R)	0.92	High
Isradipine(S)	0.92	High
Itraconazole(R)	0.8	High
Itraconazole(S)	0.8	High
Ivermectin	0.6	Low
Kanamycin	0.01	Low
Ketanserin	1	High
Ketazolam	1	High
Ketoconazole	0.75	High
Ketoprofen(R)	0.95	High
Ketoprofen(S)	0.95	High
Ketorolac(R)	0.95	High
Ketorolac(S)	0.95	High
Ketotifen	0.9	High
Labetalol	0.95	High
Lacidipine	0.98	High
Lactulose	0.01	Low
Lamivudine	0.85	High
Lamotrigine	0.98	High
Lansoprazole	0.85	High
Letrozole	1	High
Levamisole	0.95	High
Levetiracetam(R)	1	High
Levetiracetam(S)	1	High
Levobunolol	1	High
Levodopa	0.86	High
Levonorgestrel	1	High
Levosimendan	0.9	High
Lidocaine	0.98	High
Lincomycin	0.28	Low
Linezolid(R)	1	High
Linezolid(S)	1	High
Lisinopril	0.28	Low
Lisuride	1	High
Lomefloxacin(R)	0.99	High
Lomefloxacin(S)	0.99	High
Loracarbef	1	High
Loratadine	0.9	High
Lorazepam(R)	0.95	High
Lorazepam(S)	0.95	High
Lormetazepam(R)	1	High
Lormetazepam(S)	1	High
Lornoxicam	1	High
Losartan	0.8	High
Lynestrenol	1	High
Mannitol	0.16	Low
Maprotiline	0.98	High
Mebendazole	1	High
Mebeverine(R)	0.9	High
Mebeverine(S)	0.9	High
Meclofenamic_acid	1	High
Mefenamic_acid	0.9	High
Mefloquine	0.78	High
Megestrol_acetate	1	High
Meloxicam	0.9	High
Meperidine	1	High
Meptazinol(R)	1	High
Meptazinol(S)	1	High
Mesalamine	0.8	High
Mestranol	0.9	High
Metaproterenol(R)	0.43	Low
Metaproterenol(S)	0.43	Low
Metformin	0.53	Low
Methadone(R)	0.8	High
Methadone(S)	0.8	High
Methimazole	0.95	High
Methocarbamol(R)	1	High
Methocarbamol(S)	1	High
Methotrexate(R)	1	High
Methotrexate(S)	1	High
Methoxyamphetamine(R)	0.8	High
Methoxyamphetamine(S)	0.8	High
Methsuximide(R)	1	High
Methsuximide(S)	1	High
Methyldopa	0.41	Low
Methylergonovine	1	High
Methylphenidate	0.8	High
Methylprednisolone	0.82	High
Methysergide	1	High
Metoclopramide	0.88	High
Metolazone(R)	0.64	Low
Metolazone(S)	0.64	Low
Metoprolol(R)	0.96	High
Metoprolol(S)	0.96	High
Metronidazole	0.95	High
Metyrapone	0.8	High
Mexiletine(R)	0.98	High
Mexiletine(S)	0.98	High
Mezlocillin	0.01	Low
Mianserin	0.7	High
Mibefradil	0.69	Low
Miconazole(R)	0.99	High
Miconazole(S)	0.99	High
Midazolam	1	High
Mifepristone	0.9	High
Mifobate(R)	0.82	High
Mifobate(S)	0.82	High
Milrinone	0.83	High
Minoxidil	0.98	High
Mirtazapine	1	High
Misoprostol(R)	0.88	High
Misoprostol(S)	0.88	High
Mitoxantrone	0.05	Low
Moclobemide	0.88	High
Modafinil	0.8	High
Moexipril_diacid	0.05	Low
Molecule-618	0.85	High
Moricizine	0.88	High
Morphine	0.85	High
Moxalactam(R)	0.01	Low
Moxalactam(S)	0.01	Low
Moxifloxacin	0.9	High
Moxisylyte	0.7	High
Moxonidine	0.88	High
Nabumetone	0.8	High
Nadolol	0.57	Low
Nafronyl	1	High
Nalbuphine	1	High
Nalidixic_acid	0.9	High
Naloxone	0.91	High
Naltrexone	0.95	High
Naproxen	0.99	High
Naratriptan	0.7	High
Nateglinide(R)	0.83	High
Nateglinide(S)	0.83	High
Nedocromil	0.03	Low
Nefazodone	1	High
Nefopam	0.98	High
Neomycin	0.03	Low
Neostigmine	0.02	Low
Netivudine	0.28	Low
Nicardipine(R)	0.95	High
Nicardipine(S)	0.95	High
Nicorandil	1	High
Nicotine(R)	1	High
Nicotine(S)	1	High
Nicotinic_acid	0.88	High
Nifedipine	0.9	High
Nilutamide	1	High
Nilvadipine(R)	1	High
Nilvadipine(S)	1	High
Nisoldipine(R)	0.9	High
Nisoldipine(S)	0.9	High
Nitrazepam	0.95	High
Nitrendipine(R)	0.88	High
Nitrendipine(S)	0.88	High
Nitrofurantoin	0.95	High
Nitroxoline	1	High
Nizatidine	0.9	High
Nordazepam	0.99	High
Norethindrone	1	High
Norfloxacin	0.71	High
Norgestimate	1	High
Norgestrel	1	High
Nortriptyline	1	High
Obidoxime	0.05	Low
Ofloxacin(R)	1	High
Ofloxacin(S)	1	High
Olsalazine	0.24	Low
Omeprazole	0.8	High
Ondansetron(R)	1	High
Ondansetron(S)	1	High
Orphenadrine(R)	1	High
Orphenadrine(S)	1	High
Oseltamivir	0.75	High
Ouabain	0.01	Low
Oxamniquine(R)	0.8	High
Oxamniquine(S)	0.8	High
Oxaprozin	0.98	High
Oxatomide	1	High
Oxazepam(R)	0.97	High
Oxazepam(S)	0.97	High
Oxcarbazepine	1	High
Oxitropium	0.16	Low
Oxprenolol(R)	0.95	High
Oxprenolol(S)	0.95	High
Oxybutynin(R)	1	High
Oxybutynin(S)	1	High
Oxycodone	0.6	Low
Oxyfedrine	0.84	High
Oxyphenbutazone(R)	1	High
Oxyphenbutazone(S)	1	High
Oxytetracycline	0.58	Low
Pafenolol	0.29	Low
Pamidronic_acid	0.05	Low
Pantoprazole	0.77	High
Papaverine	0.9	High
Paracetamol	0.8	High
Paroxetine	1	High
Pefloxacin	1	High
Pelrinone	0.98	High
Penbutolol(R)	1	High
Penbutolol(S)	1	High
Pentazocine	0.95	High
Pentobarbital(R)	1	High
Pentobarbital(S)	1	High
Pentolinium	0.05	Low
Pentoxifylline	0.95	High
Perindopril	0.95	High
Perphenazine	1	High
Phenazopyridine	0.9	High
Phenglutarimide(R)	1	High
Phenglutarimide(S)	1	High
Phenindione	1	High
Pheniramine(R)	0.99	High
Pheniramine(S)	0.99	High
Phenobarbital	1	High
Phenoxymethyl penicillinic acid	0.45	Low
Phenprocoumon(R)	0.95	High
Phenprocoumon(S)	0.95	High
Phenylbutazone	0.98	High
Phenylpropanolamine	0.95	High
Phenytoin	0.9	High
Phthalylsulfathiazole	0.05	Low
Pimozide	0.7	High
Pindolol(R)	0.9	High
Pindolol(S)	0.9	High
Pirbuterol(R)	0.6	Low
Pirbuterol(S)	0.6	Low
Piretanide	0.85	High
Piroxicam	1	High
Piroximone	0.8	High
Pizotyline	0.8	High
Poldine	0.05	Low
Polythiazide(R)	1	High
Polythiazide(S)	1	High
Practolol(R)	0.95	High
Practolol(S)	0.95	High
Pralidoxime	0.3	Low
Pramipexole(R)	0.8	High
Pramipexole(S)	0.8	High
Pravastatin	0.34	Low
Praziquantel	1	High
Prazosin	0.86	High
Prednisolone	0.99	High
Primidone	0.75	High
Probenecid	1	High
Procainamide	0.85	High
Procarbazine	1	High
Procyclidine(R)	1	High
Procyclidine(S)	1	High
Progesterone	1	High
Proguanil	0.8	High
Promethazine(R)	0.95	High
Promethazine(S)	0.95	High
Propafenone(R)	0.95	High
Propafenone(S)	0.95	High
Propanolol	0.99	High
Propiverine	0.84	High
Propofol	1	High
Propoxyphene	0.95	High
Propranolol	0.95	High
Propylthiouracil	0.76	High
Protionamide	0.9	High
Protriptyline	0.95	High
Proxyphylline(R)	1	High
Proxyphylline(S)	1	High
Pseudoephedrine	1	High
Pyrazinamide	1	High
Quetiapine	0.73	High
Quinagolide	1	High
Quinalbarbitone	0.9	High
Quinidine	0.81	High
Rabeprazole	0.9	High
Raloxifene	0.6	Low
Ramipril	0.6	Low
Ranitidine	0.5	Low
Recainam	0.71	High
Remoxipride(R)	1	High
Remoxipride(S)	1	High
Repaglinide(R)	1	High
Repaglinide(S)	1	High
Reproterol(R)	0.6	Low
Reproterol(S)	0.6	Low
Ribavirin	0.33	Low
Riboflavin	0.8	High
Riluzole	0.9	High
Rimiterol	0.48	Low
Risedronic_acid	0.01	Low
Risperidone	0.97	High
Ritodrine	0.95	High
Rivastigmine	0.98	High
Rizatriptan	0.9	High
Ropinirole	0.98	High
Saccharin	0.88	High
Salicylic acid	1	High
Salsalate	1	High
Scopolamine	0.95	High
Selegiline(R)	1	High
Selegiline(S)	1	High
Sibutramine(R)	0.77	High
Sibutramine(S)	0.77	High
Sorivudine	0.82	High
Sotalol(R)	0.95	High
Sotalol(S)	0.95	High
Sparfloxacin	0.9	High
Spironolactone	0.73	High
Stavudine	1	High
Streptomycin	0.01	Low
Succinylsulfathiazole	0.05	Low
Sudoxicam	1	High
Sulbactam	0.05	Low
Sulfamethazine	0.95	High
Sulfamethizole	0.85	High
Sulfamethoxazole	1	High
Sulfasalazine	0.62	Low
Sulfinpyrazone	1	High
Sulfisomidine	0.9	High
Sulfisoxazole	0.95	High
Sulindac	0.9	High
Sulphasalazine	0.59	Low
Sulpiride	0.44	Low
Sultopride(R)	0.89	High
Sultopride(S)	0.89	High
Sumatriptan	0.57	Low
Tacrine	0.95	High
Tamoxifen	1	High
Tamsulosin	1	High
Telithromycin	0.9	High
Telmisartan	0.9	High
Temazepam(R)	0.95	High
Temazepam(S)	0.95	High
Temozolomide	1	High
Tenidap	0.89	High
Tenoxicam	1	High
Terazosin(R)	0.91	High
Terazosin(S)	0.91	High
Terbinafine	0.8	High
Terbutaline(R)	0.63	Low
Terbutaline(S)	0.63	Low
Terfenadine(R)	1	High
Terfenadine(S)	1	High
Tesaglitazar	1	High
Testosterone	1	High
Tetrabenazine	1	High
Tetrahydrocannabinol	0.93	High
Theophylline	1	High
Thiabendazole	0.9	High
Tiacrilast	0.99	High
Tiagabine	0.9	High
Tianeptine	0.99	High
Tibolone	0.9	High
Ticarcillin	0.05	Low
Ticlopidine	0.8	High
Tilidine	1	High
Tiludronic_acid	0.06	Low
Timolol(R)	0.95	High
Timolol(S)	0.95	High
Tinidazole	1	High
Tobramycin	0.01	Low
Tocainide(R)	1	High
Tocainide(S)	1	High
Tolazoline	0.9	High
Tolbutamide	0.85	High
Tolmesoxide	0.98	High
Tolmetin	0.99	High
Tolrestat	0.66	Low
Tolterodine	0.77	High
Topiramate	0.86	High
Torasemide	0.96	High
Toremifene	1	High
Torsemide	0.96	High
Tramadol	0.9	High
Trandolapril	0.5	Low
Tranexamic_acid	0.55	Low
Trapidil	0.96	High
Trazodone	1	High
Triamcinolone	1	High
Triamcinolone_acetonide	0.9	High
Triazolam	0.85	High
Trifluoperazine	1	High
Trihexyphenidyl(R)	1	High
Trihexyphenidyl(S)	1	High
Trimeprazine(R)	0.8	High
Trimeprazine(S)	0.8	High
Trimethoprim	0.97	High
Trimipramine(R)	0.8	High
Trimipramine(S)	0.8	High
Trofosfamide	1	High
Tropisetron	0.95	High
Trospium_chloride	0.1	Low
Trovafloxacin	0.88	High
Urapidil	0.78	High
Valproic_acid	0.98	High
Valsartan(R)	0.55	Low
Valsartan(S)	0.55	Low
Venlafaxine(R)	0.95	High
Venlafaxine(S)	0.95	High
Verapamil	0.97	High
Vigabatrin	0.58	Low
Viloxazine(R)	0.99	High
Viloxazine(S)	0.99	High
Vitamin_A	0.8	High
Warfarin(R)	0.98	High
Warfarin(S)	0.98	High
Ximoprofen	0.98	High
Zalcitabine	0.85	High
Zaleplon	1	High
Zanamivir	0.02	Low
Zatebradin	0.79	High
Zidovudine	1	High
Zileuton(R)	1	High
Zileuton(S)	1	High
Ziprasidone	0.6	Low
Zolpidem	0.95	High
Zomepirac	1	High
Zonisamide	1	High
Zopiclone(R)	0.98	High
Zopiclone(S)	0.98	High
Zotepine	1	High

## Sheet: 49 selected descriptors
Dragon Descriptors
MLOGP
MW
O-057
X3Av
nC(=N)N2
nNq
nROH
H-048
BLTA96
EEig08d
C-025
TPSA(Tot)
nRCOOR
nCconj
nRCHO
MATS3m
F-082
Uindex
nArCNO
nArNH2
GATS1v
nSH
nN=N
ARR
EEig12x
EEig15d
EEig10x
nROCON
BEHm3
EEig11r
nArCOOH
Psychotic-50
nIsothiazoles
N-069
nRCONR2
Neoplastic-50
nSO2OH
nR=CHX
EEig12r
T(O..Cl)
X4v
EEig13r
JGI10
JGI1
nSO3
EEig05r
piPC07
PJI2
C-005
