# Supplementary material for: Systems Pharmacology Dissecting Holistic Medicine for Treatment of Complex Diseases: An Example Using Cardiocerebrovascular Diseases Treated by TCM
Source: Evid Based Complement Alternat Med. 2015 May 26;2015:980190. doi: 10.1155/2015/980190 (PMC4460250; doi:10.1155/2015/980190)
Supplement: Supplementary file 1 — Table S1 shows the structure information of 367 compounds in Xinnaoxin Pill. Table S2 and Table S3 respectively represents the information for construction PreHIA and PreAM model. Table S4 displays the detailed information of compound-target interactions. And Table S5 shows the information of the 218 targets in this study. Figure S1 and Figure S2 reveal the workflow for PreHIA and PreAM. [file 980190.f1.zip › mat.980190.v2/Table S3.xls]

## Sheet: D-T action mode
Table S3. the information of PreAM.
Drug-Target Interactions
Drug Drugbank ID	Target Drugbank ID	Action Mode	Action Mode classes
DB00014	Target_148	agonist	activate
DB00014	Target_226	agonist	activate
DB00035	Target_322	agonist	activate
DB00035	Enzyme_20	inducer	activate
DB00035	Enzyme_290	inducer	activate
DB00114	Target_586	activator	activate
DB00118	Target_358	activator	activate
DB00121	Enzyme_1898	inducer	activate
DB00126	Target_97	activator	activate
DB00131	Target_1291	activator	activate
DB00131	Target_10	activator	activate
DB00131	Target_281	activator	activate
DB00131	Target_748	activator	activate
DB00131	Target_851	activator	activate
DB00136	Enzyme_3997	inducer	activate
DB00136	Enzyme_4512	inducer	activate
DB00141	Target_434	activator	activate
DB00146	Target_856	agonist	activate
DB00153	Target_856	agonist	activate
DB00157	Enzyme_6026	activator	activate
DB00159	Target_238	agonist	activate
DB00159	Target_1502	agonist	activate
DB00159	Target_1053	agonist	activate
DB00159	Target_1457	inducer	activate
DB00159	Target_1818	inducer	activate
DB00159	Target_759	agonist	activate
DB00159	Target_1558	inducer	activate
DB00162	Enzyme_6024	inducer	activate
DB00162	Enzyme_5934	inducer	activate
DB00162	Enzyme_3932	inducer	activate
DB00162	Enzyme_899	inducer	activate
DB00162	Enzyme_186	inducer	activate
DB00162	Enzyme_2157	inducer	activate
DB00162	Enzyme_810	inducer	activate
DB00162	Enzyme_4152	inducer	activate
DB00168	Target_1558	inducer	activate
DB00168	Target_438	agonist	activate
DB00169	Target_856	agonist	activate
DB00169	Target_54	activator	activate
DB00169	Target_369	activator	activate
DB00169	Target_400	activator	activate
DB00169	Target_239	activator	activate
DB00169	Target_422	activator	activate
DB00169	Target_1245	activator	activate
DB00169	Target_604	activator	activate
DB00169	Target_798	agonist	activate
DB00169	Enzyme_6024	inducer	activate
DB00169	Enzyme_4200	inducer	activate
DB00180	Target_871	agonist	activate
DB00180	Target_240	agonist	activate
DB00180	Target_4094	agonist	activate
DB00182	Target_982	agonist	activate
DB00182	Target_1636	agonist	activate
DB00183	Target_2049	agonist	activate
DB00183	Enzyme_3923	inducer	activate
DB00184	Target_947	agonist	activate
DB00184	Target_4095	agonist	activate
DB00184	Target_948	agonist	activate
DB00184	Target_813	agonist	activate
DB00184	Target_6079	agonist	activate
DB00184	Target_6080	agonist	activate
DB00184	Target_6081	agonist	activate
DB00184	Target_4097	agonist	activate
DB00184	Target_458	agonist	activate
DB00184	Target_6082	agonist	activate
DB00184	Target_6078	agonist	activate
DB00184	Enzyme_6024	inducer	activate
DB00184	Enzyme_4200	inducer	activate
DB00185	Target_51	agonist	activate
DB00185	Target_103	agonist	activate
DB00189	Target_872	agonist	activate
DB00189	Target_4098	agonist	activate
DB00189	Target_423	agonist	activate
DB00189	Target_4100	agonist	activate
DB00189	Target_580	agonist	activate
DB00189	Target_4099	agonist	activate
DB00189	Target_530	agonist	activate
DB00189	Target_523	agonist	activate
DB00189	Target_841	agonist	activate
DB00191	Enzyme_4757	inducer	activate
DB00193	Target_847	agonist	activate
DB00193	Target_696	agonist	activate
DB00193	Target_467	agonist	activate
DB00194	Target_509	inducer	activate
DB00197	Target_238	agonist	activate
DB00197	Enzyme_4512	inducer	activate
DB00197	Enzyme_6030	inducer	activate
DB00197	Enzyme_4118	inducer	activate
DB00197	Enzyme_6107	inducer	activate
DB00199	Transporter_1588	inducer	activate
DB00202	Target_458	agonist	activate
DB00202	Target_103	agonist	activate
DB00202	Target_617	agonist	activate
DB00202	Target_51	agonist	activate
DB00206	Enzyme_4118	inducer	activate
DB00206	Transporter_1588	inducer	activate
DB00210	Target_162	agonist	activate
DB00210	Target_229	agonist	activate
DB00210	Target_780	agonist	activate
DB00210	Target_88	agonist	activate
DB00210	Target_730	agonist	activate
DB00211	Target_556	agonist	activate
DB00211	Target_632	agonist	activate
DB00213	Enzyme_4512	inducer	activate
DB00213	Enzyme_4200	inducer	activate
DB00216	Target_725	agonist	activate
DB00216	Target_885	agonist	activate
DB00216	Target_511	agonist	activate
DB00216	Target_320	agonist	activate
DB00216	Target_528	agonist	activate
DB00216	Target_436	agonist	activate
DB00216	Target_716	agonist	activate
DB00216	Enzyme_4512	inducer	activate
DB00216	Enzyme_5718	inducer	activate
DB00217	Target_378	agonist	activate
DB00217	Target_318	agonist	activate
DB00217	Target_629	agonist	activate
DB00220	Transporter_1588	inducer	activate
DB00221	Target_193	agonist	activate
DB00222	Target_230	inducer	activate
DB00223	Target_871	agonist	activate
DB00224	Transporter_1588	inducer	activate
DB00226	Target_540	partial agonist	activate
DB00227	Enzyme_4757	inducer	activate
DB00228	Target_872	agonist	activate
DB00228	Target_482	agonist	activate
DB00228	Target_858	inducer	activate
DB00228	Target_633	inducer	activate
DB00234	Enzyme_4119	inducer	activate
DB00238	Enzyme_6030	inducer	activate
DB00238	Enzyme_4512	inducer	activate
DB00239	Enzyme_4512	inducer	activate
DB00240	Target_871	agonist	activate
DB00240	Enzyme_4512	inducer	activate
DB00242	Target_277	inducer	activate
DB00244	Target_238	agonist	activate
DB00247	Target_320	agonist	activate
DB00248	Target_831	agonist	activate
DB00248	Target_436	agonist	activate
DB00248	Target_638	agonist	activate
DB00248	Target_502	agonist	activate
DB00248	Target_725	agonist	activate
DB00248	Target_432	agonist	activate
DB00248	Target_320	agonist	activate
DB00248	Target_163	agonist	activate
DB00248	Target_23	agonist	activate
DB00248	Target_885	agonist	activate
DB00248	Target_590	agonist	activate
DB00250	Enzyme_4757	inducer	activate
DB00252	Enzyme_4757	inducer	activate
DB00252	Enzyme_6016	inducer	activate
DB00252	Enzyme_4924	inducer	activate
DB00252	Enzyme_6030	inducer	activate
DB00252	Enzyme_4512	inducer	activate
DB00252	Enzyme_4118	inducer	activate
DB00252	Enzyme_6107	inducer	activate
DB00252	Target_871	agonist	activate
DB00255	Target_136	agonist	activate
DB00255	Target_3809	agonist	activate
DB00255	Target_869	agonist	activate
DB00255	Enzyme_3811	inducer	activate
DB00257	Enzyme_4512	inducer	activate
DB00257	Enzyme_6030	inducer	activate
DB00257	Enzyme_6107	inducer	activate
DB00257	Transporter_1709	inducer	activate
DB00257	Transporter_1588	inducer	activate
DB00257	Transporter_1735	inducer	activate
DB00268	Target_638	agonist	activate
DB00268	Target_831	agonist	activate
DB00268	Target_432	agonist	activate
DB00268	Target_320	agonist	activate
DB00268	Target_725	agonist	activate
DB00268	Target_436	agonist	activate
DB00268	Target_23	agonist	activate
DB00268	Target_163	agonist	activate
DB00268	Target_885	agonist	activate
DB00268	Target_502	agonist	activate
DB00268	Target_590	agonist	activate
DB00268	Target_318	agonist	activate
DB00268	Target_629	agonist	activate
DB00268	Target_378	agonist	activate
DB00269	Target_136	agonist	activate
DB00269	Enzyme_3811	inducer	activate
DB00272	Target_124	agonist	activate
DB00273	Target_872	agonist	activate
DB00273	Enzyme_4512	inducer	activate
DB00274	Transporter_1735	inducer	activate
DB00277	Target_4122	activator	activate
DB00277	Enzyme_3957	inducer	activate
DB00279	Target_758	agonist	activate
DB00279	Target_346	agonist	activate
DB00279	Transporter_1588	inducer	activate
DB00285	Transporter_1732	inducer	activate
DB00287	Target_672	agonist	activate
DB00288	Target_871	agonist	activate
DB00288	Target_469	agonist	activate
DB00291	Target_872	agonist	activate
DB00291	Target_629	agonist	activate
DB00294	Target_614	agonist	activate
DB00294	Target_136	agonist	activate
DB00295	Target_847	agonist	activate
DB00295	Target_696	agonist	activate
DB00295	Target_467	agonist	activate
DB00299	Target_570	inducer	activate
DB00301	Enzyme_4512	inducer	activate
DB00304	Target_614	agonist	activate
DB00304	Target_136	agonist	activate
DB00307	Target_459	agonist	activate
DB00307	Target_88	agonist	activate
DB00307	Target_780	agonist	activate
DB00307	Enzyme_4512	inducer	activate
DB00308	Target_478	activator	activate
DB00308	Target_333	activator	activate
DB00308	Target_762	activator	activate
DB00308	Target_750	activator	activate
DB00312	Enzyme_4512	inducer	activate
DB00315	Target_885	agonist	activate
DB00315	Target_725	agonist	activate
DB00315	Target_511	agonist	activate
DB00315	Target_320	agonist	activate
DB00316	Enzyme_4512	inducer	activate
DB00318	Target_847	partial agonist	activate
DB00318	Target_696	partial agonist	activate
DB00318	Target_467	agonist	activate
DB00320	Target_725	agonist	activate
DB00320	Target_885	agonist	activate
DB00320	Target_318	agonist	activate
DB00320	Target_436	agonist	activate
DB00321	Target_467	agonist	activate
DB00321	Target_696	agonist	activate
DB00321	Target_1618	agonist	activate
DB00321	Target_6100	agonist	activate
DB00324	Target_871	agonist	activate
DB00324	Enzyme_4512	inducer	activate
DB00324	Target_613	agonist	activate
DB00327	Target_847	agonist	activate
DB00327	Target_467	partial agonist	activate
DB00327	Target_696	agonist	activate
DB00328	Target_238	activator	activate
DB00331	Target_281	inducer	activate
DB00333	Target_847	agonist	activate
DB00333	Target_467	agonist	activate
DB00333	Enzyme_4512	inducer	activate
DB00334	Target_831	agonist	activate
DB00338	Enzyme_4512	inducer	activate
DB00338	Enzyme_4200	inducer	activate
DB00338	Enzyme_6024	inducer	activate
DB00338	Enzyme_1898	inducer	activate
DB00338	Transporter_1709	inducer	activate
DB00342	Enzyme_4512	inducer	activate
DB00350	Target_709	inducer	activate
DB00350	Target_20	inducer	activate
DB00351	Target_614	agonist	activate
DB00351	Target_871	agonist	activate
DB00357	Enzyme_4512	inducer	activate
DB00357	Enzyme_4200	inducer	activate
DB00357	Enzyme_6016	inducer	activate
DB00360	Enzyme_290	inducer	activate
DB00363	Enzyme_4512	inducer	activate
DB00363	Enzyme_6024	inducer	activate
DB00363	Enzyme_1898	inducer	activate
DB00364	Target_1525	agonist	activate
DB00364	Target_1278	inducer	activate
DB00366	Enzyme_1656	inducer	activate
DB00367	Target_146	agonist	activate
DB00368	Target_556	agonist	activate
DB00368	Target_632	agonist	activate
DB00368	Target_789	agonist	activate
DB00368	Target_318	agonist	activate
DB00368	Target_629	agonist	activate
DB00368	Target_378	agonist	activate
DB00368	Target_193	agonist	activate
DB00368	Target_766	agonist	activate
DB00368	Target_1517	agonist	activate
DB00370	Target_696	agonist	activate
DB00370	Enzyme_4119	inducer	activate
DB00371	Target_872	agonist	activate
DB00371	Target_423	agonist	activate
DB00371	Target_580	agonist	activate
DB00371	Target_530	agonist	activate
DB00371	Target_523	agonist	activate
DB00371	Target_841	agonist	activate
DB00374	Target_527	agonist	activate
DB00374	Target_1502	agonist	activate
DB00374	Target_122	agonist	activate
DB00378	Target_614	agonist	activate
DB00379	Target_6220	agonist	activate
DB00388	Enzyme_4200	inducer	activate
DB00390	Transporter_1588	inducer	activate
DB00393	Target_6220	agonist	activate
DB00394	Target_871	agonist	activate
DB00394	Enzyme_4118	inducer	activate
DB00396	Target_614	agonist	activate
DB00396	Target_136	agonist	activate
DB00396	Enzyme_4512	inducer	activate
DB00396	Transporter_1588	inducer	activate
DB00397	Target_556	agonist	activate
DB00397	Target_318	agonist	activate
DB00397	Target_23	partial agonist	activate
DB00397	Target_193	agonist	activate
DB00400	Enzyme_4200	inducer	activate
DB00400	Enzyme_4512	inducer	activate
DB00402	Target_423	agonist	activate
DB00402	Target_580	agonist	activate
DB00402	Target_523	agonist	activate
DB00402	Target_811	agonist	activate
DB00403	Target_447	inducer	activate
DB00407	Target_852	agonist	activate
DB00411	Target_103	agonist	activate
DB00411	Target_617	agonist	activate
DB00411	Target_813	agonist	activate
DB00411	Enzyme_723	inducer	activate
DB00412	Target_238	agonist	activate
DB00413	Target_638	agonist	activate
DB00413	Target_831	agonist	activate
DB00413	Target_432	agonist	activate
DB00413	Target_318	partial agonist	activate
DB00418	Enzyme_4757	inducer	activate
DB00418	Enzyme_4924	inducer	activate
DB00418	Enzyme_4200	inducer	activate
DB00421	Enzyme_805	inducer	activate
DB00421	Transporter_1735	inducer	activate
DB00425	Target_423	agonist	activate
DB00425	Target_580	agonist	activate
DB00428	Enzyme_6024	inducer	activate
DB00428	Enzyme_4200	inducer	activate
DB00428	Enzyme_6013	inducer	activate
DB00428	Transporter_1588	inducer	activate
DB00429	Target_73	agonist	activate
DB00436	Target_610	inducer	activate
DB00439	Enzyme_4512	inducer	activate
DB00439	Enzyme_4757	inducer	activate
DB00439	Enzyme_6030	inducer	activate
DB00440	Transporter_1588	inducer	activate
DB00443	Target_871	agonist	activate
DB00443	Enzyme_3811	inducer	activate
DB00448	Enzyme_4512	inducer	activate
DB00448	Enzyme_4757	inducer	activate
DB00448	Enzyme_6024	inducer	activate
DB00448	Enzyme_4200	inducer	activate
DB00448	Enzyme_1898	inducer	activate
DB00448	Enzyme_468	inducer	activate
DB00449	Target_556	agonist	activate
DB00449	Target_318	agonist	activate
DB00449	Target_766	agonist	activate
DB00451	Target_758	agonist	activate
DB00451	Target_346	agonist	activate
DB00451	Transporter_1588	inducer	activate
DB00454	Enzyme_4512	inducer	activate
DB00454	Enzyme_6016	inducer	activate
DB00454	Enzyme_4119	inducer	activate
DB00457	Target_459	agonist	activate
DB00457	Target_730	agonist	activate
DB00457	Target_229	agonist	activate
DB00457	Target_162	agonist	activate
DB00457	Target_88	agonist	activate
DB00457	Target_780	agonist	activate
DB00457	Target_331	agonist	activate
DB00468	Enzyme_4200	inducer	activate
DB00468	Enzyme_6024	inducer	activate
DB00468	Enzyme_4512	inducer	activate
DB00470	Target_68	agonist	activate
DB00470	Target_106	agonist	activate
DB00481	Target_136	agonist	activate
DB00481	Target_869	agonist	activate
DB00484	Target_318	agonist	activate
DB00484	Target_629	agonist	activate
DB00484	Target_378	agonist	activate
DB00485	Enzyme_4512	inducer	activate
DB00486	Target_106	partial agonist	activate
DB00486	Target_68	partial agonist	activate
DB00490	Target_320	partial agonist	activate
DB00497	Target_847	agonist	activate
DB00497	Target_696	agonist	activate
DB00497	Target_467	agonist	activate
DB00499	Target_6220	agonist	activate
DB00501	Transporter_1588	inducer	activate
DB00502	Enzyme_4119	inducer	activate
DB00503	Enzyme_6016	inducer	activate
DB00503	Enzyme_6030	inducer	activate
DB00503	Enzyme_4924	inducer	activate
DB00503	Enzyme_4512	inducer	activate
DB00503	Enzyme_4757	inducer	activate
DB00503	Enzyme_4200	inducer	activate
DB00503	Transporter_1588	inducer	activate
DB00503	Transporter_862	inducer	activate
DB00503	Transporter_1735	inducer	activate
DB00504	Target_847	partial agonist	activate
DB00509	Target_758	agonist	activate
DB00509	Target_346	agonist	activate
DB00514	Target_174	agonist	activate
DB00514	Target_319	agonist	activate
DB00515	Enzyme_1757	inducer	activate
DB00515	Enzyme_3947	inducer	activate
DB00515	Enzyme_468	inducer	activate
DB00515	Transporter_1709	inducer	activate
DB00515	Transporter_6136	inducer	activate
DB00515	Transporter_1735	inducer	activate
DB00518	Enzyme_6024	inducer	activate
DB00518	Enzyme_4200	inducer	activate
DB00521	Target_193	partial agonist	activate
DB00523	Target_730	agonist	activate
DB00523	Target_459	agonist	activate
DB00523	Target_229	agonist	activate
DB00523	Target_88	agonist	activate
DB00523	Target_162	agonist	activate
DB00523	Target_780	agonist	activate
DB00530	Target_1284	agonist	activate
DB00531	Enzyme_4757	inducer	activate
DB00531	Enzyme_4512	inducer	activate
DB00531	Enzyme_6030	inducer	activate
DB00531	Enzyme_4924	inducer	activate
DB00533	Enzyme_4512	inducer	activate
DB00534	Target_558	inducer	activate
DB00540	Transporter_1588	inducer	activate
DB00543	Enzyme_4512	inducer	activate
DB00547	Target_871	agonist	activate
DB00559	Enzyme_4512	inducer	activate
DB00559	Enzyme_4757	inducer	activate
DB00563	Enzyme_4512	inducer	activate
DB00563	Enzyme_4924	inducer	activate
DB00563	Enzyme_4200	inducer	activate
DB00563	Enzyme_4757	inducer	activate
DB00563	Enzyme_6016	inducer	activate
DB00563	Enzyme_6030	inducer	activate
DB00563	Enzyme_4118	inducer	activate
DB00563	Transporter_1588	inducer	activate
DB00570	Transporter_1588	inducer	activate
DB00570	Transporter_862	inducer	activate
DB00570	Transporter_1735	inducer	activate
DB00573	Target_436	agonist	activate
DB00573	Target_590	agonist	activate
DB00575	Target_318	agonist	activate
DB00575	Target_629	agonist	activate
DB00575	Target_378	agonist	activate
DB00576	Target_509	inducer	activate
DB00583	Target_451	activator	activate
DB00588	Target_871	agonist	activate
DB00588	Target_614	agonist	activate
DB00588	Target_831	agonist	activate
DB00588	Target_638	agonist	activate
DB00588	Target_432	agonist	activate
DB00588	Target_320	agonist	activate
DB00588	Target_725	agonist	activate
DB00588	Target_502	agonist	activate
DB00588	Target_590	agonist	activate
DB00588	Target_885	agonist	activate
DB00590	Target_871	agonist	activate
DB00592	Target_4099	agonist	activate
DB00596	Target_871	agonist	activate
DB00603	Target_614	agonist	activate
DB00603	Target_136	agonist	activate
DB00603	Enzyme_4512	inducer	activate
DB00604	Target_94	agonist	activate
DB00604	Target_341	agonist	activate
DB00604	Target_502	agonist	activate
DB00607	Enzyme_4512	inducer	activate
DB00607	Enzyme_4200	inducer	activate
DB00610	Target_556	agonist	activate
DB00611	Target_696	agonist	activate
DB00611	Target_467	agonist	activate
DB00615	Enzyme_4512	inducer	activate
DB00620	Target_871	agonist	activate
DB00620	Enzyme_3923	inducer	activate
DB00621	Target_146	agonist	activate
DB00622	Enzyme_4512	inducer	activate
DB00622	Enzyme_4757	inducer	activate
DB00622	Enzyme_6030	inducer	activate
DB00624	Target_146	agonist	activate
DB00624	Enzyme_3941	inducer	activate
DB00624	Enzyme_4512	inducer	activate
DB00624	Enzyme_6030	inducer	activate
DB00624	Transporter_6139	inducer	activate
DB00624	Transporter_6142	inducer	activate
DB00624	Transporter_6143	inducer	activate
DB00625	Enzyme_6030	inducer	activate
DB00625	Enzyme_4512	inducer	activate
DB00627	Target_928	agonist	activate
DB00627	Target_699	agonist	activate
DB00627	Target_811	agonist	activate
DB00629	Target_318	agonist	activate
DB00633	Target_318	agonist	activate
DB00635	Target_871	agonist	activate
DB00635	Enzyme_4512	inducer	activate
DB00635	Enzyme_6016	inducer	activate
DB00636	Target_80	agonist	activate
DB00636	Enzyme_6013	inducer	activate
DB00636	Enzyme_4512	inducer	activate
DB00636	Enzyme_6024	inducer	activate
DB00636	Enzyme_6030	inducer	activate
DB00636	Enzyme_468	inducer	activate
DB00640	Target_1178	agonist	activate
DB00640	Target_268	agonist	activate
DB00640	Target_390	agonist	activate
DB00640	Target_16	agonist	activate
DB00640	Enzyme_4512	inducer	activate
DB00640	Enzyme_4757	inducer	activate
DB00640	Enzyme_6030	inducer	activate
DB00642	Enzyme_4773	inducer	activate
DB00642	Enzyme_2222	inducer	activate
DB00643	Enzyme_6024	inducer	activate
DB00644	Target_226	agonist	activate
DB00647	Target_847	agonist	activate
DB00647	Target_467	agonist	activate
DB00647	Enzyme_6107	inducer	activate
DB00648	Target_805	inducer	activate
DB00652	Target_696	agonist	activate
DB00652	Target_174	agonist	activate
DB00654	Target_672	agonist	activate
DB00654	Target_136	agonist	activate
DB00654	Transporter_1588	inducer	activate
DB00654	Target_590	agonist	activate
DB00654	Target_320	partial agonist	activate
DB00654	Transporter_1588	inducer	activate
DB00661	Enzyme_6030	inducer	activate
DB00661	Transporter_1588	inducer	activate
DB00663	Target_871	agonist	activate
DB00666	Target_226	agonist	activate
DB00668	Target_556	agonist	activate
DB00668	Target_632	agonist	activate
DB00668	Target_193	agonist	activate
DB00668	Target_766	agonist	activate
DB00668	Target_318	agonist	activate
DB00668	Target_629	agonist	activate
DB00669	Target_725	agonist	activate
DB00669	Target_885	agonist	activate
DB00669	Target_511	agonist	activate
DB00669	Target_320	agonist	activate
DB00669	Transporter_6139	inducer	activate
DB00673	Enzyme_4757	inducer	activate
DB00675	Target_136	agonist	activate
DB00675	Target_869	agonist	activate
DB00675	Enzyme_4512	inducer	activate
DB00675	Transporter_1588	inducer	activate
DB00682	Transporter_1588	inducer	activate
DB00687	Target_737	agonist	activate
DB00687	Target_871	agonist	activate
DB00687	Target_146	agonist	activate
DB00693	Enzyme_6024	inducer	activate
DB00694	Enzyme_4118	inducer	activate
DB00694	Transporter_1588	inducer	activate
DB00695	Transporter_1729	inducer	activate
DB00695	Target_725	agonist	activate
DB00695	Target_885	agonist	activate
DB00695	Target_502	agonist	activate
DB00695	Target_831	agonist	activate
DB00695	Target_556	partial agonist	activate
DB00695	Target_632	partial agonist	activate
DB00695	Target_789	partial agonist	activate
DB00695	Target_318	partial agonist	activate
DB00695	Target_629	agonist	activate
DB00695	Target_629	partial agonist	activate
DB00697	Target_318	agonist	activate
DB00697	Target_629	agonist	activate
DB00697	Target_378	agonist	activate
DB00697	Target_6070	agonist	activate
DB00699	Target_556	agonist	activate
DB00701	Transporter_1588	inducer	activate
DB00708	Target_847	agonist	activate
DB00708	Target_467	agonist	activate
DB00714	Target_638	agonist	activate
DB00714	Target_432	agonist	activate
DB00714	Target_831	agonist	activate
DB00714	Target_378	agonist	activate
DB00714	Target_629	agonist	activate
DB00714	Target_590	agonist	activate
DB00714	Target_163	agonist	activate
DB00714	Target_320	agonist	activate
DB00714	Target_502	agonist	activate
DB00714	Target_436	agonist	activate
DB00714	Target_318	agonist	activate
DB00714	Target_23	agonist	activate
DB00714	Target_725	agonist	activate
DB00714	Target_885	agonist	activate
DB00714	Target_734	agonist	activate
DB00717	Target_614	agonist	activate
DB00717	Enzyme_6016	inducer	activate
DB00717	Transporter_1588	inducer	activate
DB00719	Enzyme_4512	inducer	activate
DB00723	Target_556	agonist	activate
DB00723	Target_632	agonist	activate
DB00724	Target_173	agonist	activate
DB00724	Target_5998	agonist	activate
DB00726	Target_502	agonist	activate
DB00727	Target_613	agonist	activate
DB00730	Enzyme_6024	inducer	activate
DB00731	Target_238	agonist	activate
DB00733	Target_474	activator	activate
DB00733	Target_3923	activator	activate
DB00734	Target_629	agonist	activate
DB00734	Target_378	agonist	activate
DB00740	Target_33	inducer	activate
DB00741	Target_871	agonist	activate
DB00741	Target_469	agonist	activate
DB00741	Enzyme_4924	inducer	activate
DB00745	Target_632	partial agonist	activate
DB00745	Enzyme_6016	inducer	activate
DB00745	Enzyme_4512	inducer	activate
DB00745	Enzyme_4200	inducer	activate
DB00745	Enzyme_6030	inducer	activate
DB00745	Enzyme_4757	inducer	activate
DB00745	Enzyme_4118	inducer	activate
DB00753	Target_872	agonist	activate
DB00753	Target_482	agonist	activate
DB00753	Target_858	inducer	activate
DB00753	Enzyme_6030	inducer	activate
DB00755	Target_88	agonist	activate
DB00755	Target_780	agonist	activate
DB00755	Target_162	agonist	activate
DB00755	Target_719	agonist	activate
DB00764	Target_871	agonist	activate
DB00769	Target_871	agonist	activate
DB00769	Enzyme_4512	inducer	activate
DB00770	Target_406	agonist	activate
DB00770	Target_73	agonist	activate
DB00773	Enzyme_4512	inducer	activate
DB00773	Enzyme_4118	inducer	activate
DB00776	Enzyme_4512	inducer	activate
DB00776	Enzyme_4118	inducer	activate
DB00780	Enzyme_6013	inducer	activate
DB00783	Target_136	agonist	activate
DB00783	Target_869	agonist	activate
DB00794	Enzyme_6016	inducer	activate
DB00794	Enzyme_4757	inducer	activate
DB00794	Enzyme_4512	inducer	activate
DB00794	Enzyme_4200	inducer	activate
DB00794	Enzyme_6030	inducer	activate
DB00794	Enzyme_4924	inducer	activate
DB00795	Target_238	agonist	activate
DB00797	Target_492	agonist	activate
DB00799	Target_730	agonist	activate
DB00799	Target_88	agonist	activate
DB00799	Target_162	agonist	activate
DB00799	Target_229	agonist	activate
DB00800	Target_163	agonist	activate
DB00800	Target_23	agonist	activate
DB00802	Target_847	agonist	activate
DB00804	Enzyme_6024	inducer	activate
DB00805	Target_23	agonist	activate
DB00805	Target_831	agonist	activate
DB00805	Target_103	agonist	activate
DB00811	Target_6021	activator	activate
DB00811	Target_289	inducer	activate
DB00812	Enzyme_4512	inducer	activate
DB00813	Target_847	agonist	activate
DB00813	Target_467	agonist	activate
DB00813	Target_696	agonist	activate
DB00816	Target_766	agonist	activate
DB00823	Target_614	agonist	activate
DB00823	Target_136	agonist	activate
DB00825	Target_2162	inducer	activate
DB00825	Target_1944	inducer	activate
DB00825	Target_5838	inducer	activate
DB00825	Target_696	agonist	activate
DB00833	Enzyme_1757	inducer	activate
DB00834	Enzyme_4512	inducer	activate
DB00834	Transporter_1588	inducer	activate
DB00836	Target_847	agonist	activate
DB00836	Target_467	agonist	activate
DB00836	Target_696	agonist	activate
DB00837	Target_240	agonist	activate
DB00837	Target_872	agonist	activate
DB00838	Target_871	agonist	activate
DB00841	Target_193	agonist	activate
DB00841	Target_766	agonist	activate
DB00844	Target_696	agonist	activate
DB00846	Target_871	agonist	activate
DB00848	Target_6079	agonist	activate
DB00852	Target_556	agonist	activate
DB00852	Target_318	agonist	activate
DB00852	Target_766	partial agonist	activate
DB00852	Target_193	agonist	activate
DB00852	Target_193	partial agonist	activate
DB00853	Enzyme_4512	inducer	activate
DB00854	Target_847	agonist	activate
DB00854	Target_467	agonist	activate
DB00854	Target_696	agonist	activate
DB00855	Target_56	inducer	activate
DB00856	Enzyme_1656	inducer	activate
DB00856	Enzyme_3811	inducer	activate
DB00856	Enzyme_4512	inducer	activate
DB00856	Enzyme_3923	inducer	activate
DB00857	Enzyme_4512	inducer	activate
DB00858	Target_146	agonist	activate
DB00860	Target_871	agonist	activate
DB00864	Transporter_1588	inducer	activate
DB00865	Target_131	inducer	activate
DB00865	Target_318	agonist	activate
DB00865	Target_556	agonist	activate
DB00867	Target_766	agonist	activate
DB00871	Target_766	agonist	activate
DB00873	Target_871	agonist	activate
DB00875	Enzyme_3876	inducer	activate
DB00876	Transporter_1735	inducer	activate
DB00877	Transporter_1588	inducer	activate
DB00882	Target_136	agonist	activate
DB00882	Enzyme_6024	inducer	activate
DB00883	Target_613	agonist	activate
DB00884	Enzyme_290	inducer	activate
DB00887	Enzyme_290	inducer	activate
DB00889	Enzyme_4119	inducer	activate
DB00890	Target_136	agonist	activate
DB00895	Target_55	agonist	activate
DB00895	Target_18	agonist	activate
DB00896	Target_871	agonist	activate
DB00898	Target_872	agonist	activate
DB00898	Target_482	agonist	activate
DB00898	Target_820	agonist	activate
DB00898	Target_251	agonist	activate
DB00898	Target_444	agonist	activate
DB00898	Target_517	agonist	activate
DB00898	Enzyme_6013	inducer	activate
DB00898	Enzyme_4512	inducer	activate
DB00898	Enzyme_468	inducer	activate
DB00899	Target_847	agonist	activate
DB00899	Target_467	agonist	activate
DB00899	Target_696	agonist	activate
DB00903	Target_94	agonist	activate
DB00905	Target_672	agonist	activate
DB00905	Target_73	agonist	activate
DB00905	Target_4131	agonist	activate
DB00908	Enzyme_4512	inducer	activate
DB00910	Target_856	agonist	activate
DB00912	Target_238	agonist	activate
DB00912	Target_847	agonist	activate
DB00914	Target_748	activator	activate
DB00915	Target_831	agonist	activate
DB00915	Enzyme_3876	inducer	activate
DB00917	Target_406	agonist	activate
DB00917	Target_73	agonist	activate
DB00917	Target_4131	agonist	activate
DB00917	Target_6002	agonist	activate
DB00917	Enzyme_3811	inducer	activate
DB00918	Target_885	agonist	activate
DB00918	Target_725	agonist	activate
DB00921	Target_847	partial agonist	activate
DB00922	Target_781	inducer	activate
DB00922	Target_4209	inducer	activate
DB00926	Target_730	agonist	activate
DB00926	Target_459	agonist	activate
DB00926	Target_229	agonist	activate
DB00926	Target_780	agonist	activate
DB00926	Target_88	agonist	activate
DB00926	Target_162	agonist	activate
DB00929	Target_4131	agonist	activate
DB00929	Target_406	agonist	activate
DB00929	Target_6002	agonist	activate
DB00934	Target_556	agonist	activate
DB00934	Target_318	agonist	activate
DB00938	Target_766	agonist	activate
DB00945	Enzyme_6016	inducer	activate
DB00949	Enzyme_4512	inducer	activate
DB00950	Enzyme_6013	inducer	activate
DB00952	Target_725	agonist	activate
DB00952	Target_885	agonist	activate
DB00952	Target_511	agonist	activate
DB00952	Target_320	agonist	activate
DB00953	Target_725	agonist	activate
DB00953	Target_885	agonist	activate
DB00953	Target_511	agonist	activate
DB00956	Target_847	agonist	activate
DB00956	Target_467	agonist	activate
DB00957	Target_614	agonist	activate
DB00957	Target_136	agonist	activate
DB00959	Target_871	agonist	activate
DB00960	Target_193	partial agonist	activate
DB00960	Target_766	partial agonist	activate
DB00960	Enzyme_4119	inducer	activate
DB00964	Target_318	agonist	activate
DB00964	Target_556	agonist	activate
DB00966	Target_238	partial agonist	activate
DB00977	Target_136	agonist	activate
DB00977	Target_1284	agonist	activate
DB00977	Transporter_776	inducer	activate
DB00977	Transporter_6141	inducer	activate
DB00977	Transporter_1735	inducer	activate
DB00983	Target_766	agonist	activate
DB00984	Target_146	agonist	activate
DB00988	Target_831	agonist	activate
DB00988	Target_23	agonist	activate
DB00988	Target_163	agonist	activate
DB00988	Target_638	agonist	activate
DB00988	Target_432	agonist	activate
DB00988	Target_713	inducer	activate
DB00995	Target_16	agonist	activate
DB00997	Transporter_1588	inducer	activate
DB00998	Target_725	agonist	activate
DB00998	Target_885	agonist	activate
DB01001	Target_766	agonist	activate
DB01001	Target_193	agonist	activate
DB01004	Target_2559	inducer	activate
DB01011	Enzyme_4512	inducer	activate
DB01011	Transporter_1709	inducer	activate
DB01012	Target_565	agonist	activate
DB01013	Target_871	agonist	activate
DB01014	Target_238	agonist	activate
DB01018	Target_318	agonist	activate
DB01019	Target_617	agonist	activate
DB01020	Target_6068	inducer	activate
DB01022	Target_448	inducer	activate
DB01022	Target_798	agonist	activate
DB01026	Enzyme_6024	inducer	activate
DB01028	Target_872	agonist	activate
DB01028	Target_482	agonist	activate
DB01028	Target_858	inducer	activate
DB01030	Enzyme_4512	inducer	activate
DB01032	Enzyme_4924	inducer	activate
DB01032	Enzyme_4512	inducer	activate
DB01039	Target_80	agonist	activate
DB01041	Enzyme_4118	inducer	activate
DB01045	Target_1284	agonist	activate
DB01045	Enzyme_4757	inducer	activate
DB01045	Enzyme_4200	inducer	activate
DB01045	Enzyme_4924	inducer	activate
DB01045	Enzyme_4512	inducer	activate
DB01045	Enzyme_6030	inducer	activate
DB01045	Enzyme_6022	inducer	activate
DB01045	Enzyme_6016	inducer	activate
DB01045	Enzyme_5718	inducer	activate
DB01045	Enzyme_6013	inducer	activate
DB01045	Enzyme_6031	inducer	activate
DB01045	Enzyme_4118	inducer	activate
DB01045	Enzyme_6107	inducer	activate
DB01045	Enzyme_468	inducer	activate
DB01045	Transporter_1588	inducer	activate
DB01045	Transporter_6136	inducer	activate
DB01045	Transporter_1735	inducer	activate
DB01045	Transporter_1709	inducer	activate
DB01046	Target_842	inducer	activate
DB01047	Target_871	agonist	activate
DB01050	Target_238	activator	activate
DB01064	Target_193	agonist	activate
DB01064	Target_766	agonist	activate
DB01064	Target_1517	agonist	activate
DB01064	Target_1176	inducer	activate
DB01064	Target_1281	agonist	activate
DB01064	Target_4145	agonist	activate
DB01064	Target_4146	agonist	activate
DB01065	Target_571	agonist	activate
DB01065	Target_362	agonist	activate
DB01065	Target_6035	agonist	activate
DB01067	Target_238	agonist	activate
DB01070	Target_856	agonist	activate
DB01073	Target_4773	agonist	activate
DB01076	Target_6220	agonist	activate
DB01076	Enzyme_4512	inducer	activate
DB01076	Enzyme_4757	inducer	activate
DB01076	Enzyme_6030	inducer	activate
DB01079	Target_94	partial agonist	activate
DB01080	Target_240	agonist	activate
DB01080	Target_847	agonist	activate
DB01080	Target_467	agonist	activate
DB01083	Enzyme_4512	inducer	activate
DB01085	Target_51	agonist	activate
DB01085	Target_103	agonist	activate
DB01085	Target_617	agonist	activate
DB01087	Enzyme_4200	inducer	activate
DB01087	Enzyme_6024	inducer	activate
DB01087	Enzyme_1898	inducer	activate
DB01088	Target_527	agonist	activate
DB01088	Target_73	agonist	activate
DB01088	Target_1971	inducer	activate
DB01088	Target_541	inducer	activate
DB01088	Target_4109	inducer	activate
DB01088	Target_2358	inducer	activate
DB01095	Enzyme_4512	inducer	activate
DB01095	Enzyme_4757	inducer	activate
DB01095	Enzyme_6030	inducer	activate
DB01097	Target_6220	agonist	activate
DB01102	Target_193	agonist	activate
DB01102	Target_766	agonist	activate
DB01102	Target_1517	agonist	activate
DB01107	Target_872	agonist	activate
DB01115	Enzyme_4512	inducer	activate
DB01115	Enzyme_6030	inducer	activate
DB01115	Enzyme_4757	inducer	activate
DB01115	Transporter_1709	inducer	activate
DB01115	Transporter_1588	inducer	activate
DB01115	Transporter_1735	inducer	activate
DB01118	Transporter_1588	inducer	activate
DB01119	Target_781	inducer	activate
DB01129	Enzyme_6024	inducer	activate
DB01129	Enzyme_4200	inducer	activate
DB01130	Target_871	agonist	activate
DB01132	Target_238	agonist	activate
DB01132	Enzyme_4512	inducer	activate
DB01134	Target_737	agonist	activate
DB01138	Enzyme_4512	inducer	activate
DB01138	Enzyme_6030	inducer	activate
DB01143	Target_1075	inducer	activate
DB01143	Target_508	inducer	activate
DB01143	Enzyme_4757	inducer	activate
DB01147	Target_2478	inducer	activate
DB01149	Transporter_1588	inducer	activate
DB01154	Target_872	agonist	activate
DB01159	Target_672	agonist	activate
DB01167	Enzyme_6024	inducer	activate
DB01169	Target_2038	inducer	activate
DB01169	Target_1629	inducer	activate
DB01169	Target_1714	inducer	activate
DB01169	Target_1176	inducer	activate
DB01169	Target_476	inducer	activate
DB01169	Transporter_1735	inducer	activate
DB01170	Target_540	inducer	activate
DB01170	Enzyme_4512	inducer	activate
DB01171	Enzyme_4119	inducer	activate
DB01172	Enzyme_6030	inducer	activate
DB01172	Enzyme_6016	inducer	activate
DB01172	Enzyme_4757	inducer	activate
DB01172	Enzyme_6030	inducer	activate
DB01172	Enzyme_4924	inducer	activate
DB01172	Enzyme_4512	inducer	activate
DB01172	Enzyme_4200	inducer	activate
DB01172	Enzyme_5718	inducer	activate
DB01172	Enzyme_6013	inducer	activate
DB01172	Enzyme_4118	inducer	activate
DB01172	Enzyme_468	inducer	activate
DB01172	Enzyme_6024	inducer	activate
DB01172	Enzyme_1898	inducer	activate
DB01172	Enzyme_6106	inducer	activate
DB01172	Enzyme_6107	inducer	activate
DB01172	Transporter_1588	inducer	activate
DB01172	Transporter_1709	inducer	activate
DB01172	Transporter_776	inducer	activate
DB01172	Transporter_862	inducer	activate
DB01172	Transporter_6152	inducer	activate
DB01172	Transporter_1735	inducer	activate
DB01178	Target_811	agonist	activate
DB01181	Enzyme_4512	inducer	activate
DB01181	Enzyme_4757	inducer	activate
DB01181	Enzyme_4924	inducer	activate
DB01185	Target_146	agonist	activate
DB01185	Target_831	agonist	activate
DB01185	Target_638	agonist	activate
DB01185	Target_432	agonist	activate
DB01185	Target_320	agonist	activate
DB01185	Target_436	agonist	activate
DB01185	Target_502	agonist	activate
DB01185	Target_725	agonist	activate
DB01185	Target_629	agonist	activate
DB01185	Target_318	agonist	activate
DB01185	Target_378	agonist	activate
DB01185	Target_163	agonist	activate
DB01185	Target_23	agonist	activate
DB01185	Target_885	agonist	activate
DB01185	Target_590	agonist	activate
DB01185	Target_556	agonist	activate
DB01185	Target_632	agonist	activate
DB01185	Target_789	agonist	activate
DB01189	Target_872	agonist	activate
DB01189	Target_482	agonist	activate
DB01189	Target_858	inducer	activate
DB01191	Target_590	agonist	activate
DB01192	Target_847	agonist	activate
DB01193	Target_193	partial agonist	activate
DB01193	Target_766	partial agonist	activate
DB01196	Target_136	agonist	activate
DB01198	Target_811	agonist	activate
DB01199	Target_831	agonist	activate
DB01199	Target_638	agonist	activate
DB01199	Target_725	agonist	activate
DB01199	Target_318	agonist	activate
DB01199	Target_320	agonist	activate
DB01199	Target_378	agonist	activate
DB01199	Target_629	agonist	activate
DB01199	Target_436	agonist	activate
DB01199	Target_502	agonist	activate
DB01199	Target_885	agonist	activate
DB01199	Target_590	agonist	activate
DB01199	Target_163	agonist	activate
DB01199	Target_23	agonist	activate
DB01199	Target_556	agonist	activate
DB01199	Target_632	agonist	activate
DB01199	Target_789	agonist	activate
DB01201	Enzyme_4757	inducer	activate
DB01201	Enzyme_4512	inducer	activate
DB01201	Enzyme_4924	inducer	activate
DB01201	Enzyme_4119	inducer	activate
DB01201	Enzyme_6031	inducer	activate
DB01201	Enzyme_4118	inducer	activate
DB01201	Enzyme_6107	inducer	activate
DB01202	Target_1435	agonist	activate
DB01204	Transporter_1588	inducer	activate
DB01209	Target_847	agonist	activate
DB01211	Enzyme_4512	inducer	activate
DB01212	Enzyme_3987	inducer	activate
DB01220	Target_1284	agonist	activate
DB01220	Enzyme_4512	inducer	activate
DB01221	Target_831	agonist	activate
DB01221	Target_831	partial agonist	activate
DB01226	Target_617	partial agonist	activate
DB01227	Target_847	agonist	activate
DB01229	Enzyme_4512	inducer	activate
DB01232	Transporter_1588	inducer	activate
DB01232	Target_103	agonist	activate
DB01232	Target_94	agonist	activate
DB01232	Enzyme_6023	inducer	activate
DB01234	Target_871	agonist	activate
DB01234	Target_84	stimulator	activate
DB01234	Target_469	agonist	activate
DB01234	Enzyme_4512	inducer	activate
DB01234	Enzyme_4118	inducer	activate
DB01234	Enzyme_6107	inducer	activate
DB01234	Enzyme_4757	inducer	activate
DB01234	Enzyme_3811	inducer	activate
DB01234	Enzyme_6024	inducer	activate
DB01234	Enzyme_1898	inducer	activate
DB01234	Enzyme_5718	inducer	activate
DB01234	Enzyme_6030	inducer	activate
DB01234	Enzyme_6016	inducer	activate
DB01234	Enzyme_4924	inducer	activate
DB01234	Enzyme_4119	inducer	activate
DB01234	Enzyme_6013	inducer	activate
DB01234	Enzyme_6031	inducer	activate
DB01234	Enzyme_468	inducer	activate
DB01234	Transporter_776	inducer	activate
DB01234	Transporter_1588	inducer	activate
DB01234	Transporter_1735	inducer	activate
DB01235	Target_23	agonist	activate
DB01235	Target_163	agonist	activate
DB01235	Target_831	agonist	activate
DB01235	Target_638	agonist	activate
DB01235	Target_432	agonist	activate
DB01235	Target_872	agonist	activate
DB01235	Target_482	agonist	activate
DB01235	Target_858	inducer	activate
DB01235	Target_831	partial agonist	activate
DB01235	Target_320	partial agonist	activate
DB01235	Target_23	partial agonist	activate
DB01235	Target_163	partial agonist	activate
DB01235	Target_638	partial agonist	activate
DB01235	Target_432	partial agonist	activate
DB01235	Enzyme_4119	inducer	activate
DB01240	Target_122	agonist	activate
DB01240	Target_527	agonist	activate
DB01240	Target_130	inducer	activate
DB01241	Target_80	agonist	activate
DB01241	Enzyme_4924	inducer	activate
DB01241	Enzyme_4512	inducer	activate
DB01245	Target_813	partial agonist	activate
DB01246	Enzyme_4512	inducer	activate
DB01248	Enzyme_1898	inducer	activate
DB01252	Target_238	agonist	activate
DB01253	Target_556	agonist	activate
DB01260	Target_871	agonist	activate
DB01267	Target_492	agonist	activate
DB01267	Target_378	agonist	activate
DB01273	Target_947	partial agonist	activate
DB01273	Target_4095	agonist	activate
DB01273	Target_6079	partial agonist	activate
DB01273	Target_6081	partial agonist	activate
DB01274	Target_766	agonist	activate
DB01282	Target_940	agonist	activate
DB01288	Target_766	agonist	activate
DB01288	Target_193	agonist	activate
DB01288	Target_1517	agonist	activate
DB01291	Target_766	agonist	activate
DB01291	Target_193	agonist	activate
DB01320	Enzyme_4757	inducer	activate
DB01320	Enzyme_4924	inducer	activate
DB01320	Enzyme_6016	inducer	activate
DB01320	Enzyme_4512	inducer	activate
DB01320	Enzyme_6030	inducer	activate
DB01333	Enzyme_4512	inducer	activate
DB01351	Enzyme_5718	inducer	activate
DB01357	Target_136	agonist	activate
DB01359	Target_193	partial agonist	activate
DB01359	Target_766	partial agonist	activate
DB01361	Enzyme_4118	inducer	activate
DB01365	Target_556	agonist	activate
DB01366	Target_766	agonist	activate
DB01367	Target_273	activator	activate
DB01380	Target_871	agonist	activate
DB01382	Target_230	inducer	activate
DB01384	Target_871	agonist	activate
DB01392	Target_320	partial agonist	activate
DB01393	Target_80	agonist	activate
DB01393	Target_1502	agonist	activate
DB01393	Target_238	agonist	activate
DB01393	Enzyme_6024	inducer	activate
DB01394	Enzyme_4512	inducer	activate
DB01394	Enzyme_4924	inducer	activate
DB01394	Enzyme_4757	inducer	activate
DB01394	Enzyme_6013	inducer	activate
DB01394	Transporter_6138	inducer	activate
DB01395	Target_614	agonist	activate
DB01406	Target_136	agonist	activate
DB01406	Target_146	agonist	activate
DB01406	Target_614	agonist	activate
DB01406	Target_766	agonist	activate
DB01406	Target_193	agonist	activate
DB01406	Target_1517	agonist	activate
DB01406	Target_1820	stimulator	activate
DB01408	Target_766	agonist	activate
DB01410	Target_871	agonist	activate
DB01420	Target_146	agonist	activate
DB01420	Enzyme_6022	inducer	activate
DB01431	Target_614	agonist	activate
DB01431	Target_136	agonist	activate
DB01433	Target_847	agonist	activate
DB01436	Target_856	agonist	activate
DB01437	Target_872	agonist	activate
DB01437	Enzyme_4119	inducer	activate
DB01439	Target_847	agonist	activate
DB01439	Target_467	agonist	activate
DB01439	Target_696	agonist	activate
DB01440	Target_4098	agonist	activate
DB01442	Target_502	agonist	activate
DB01444	Target_847	agonist	activate
DB01444	Target_467	agonist	activate
DB01452	Target_847	agonist	activate
DB01452	Target_696	agonist	activate
DB01452	Target_467	agonist	activate
DB01454	Target_502	agonist	activate
DB01454	Target_436	agonist	activate
DB01454	Target_590	agonist	activate
DB01466	Target_847	agonist	activate
DB01472	Target_556	agonist	activate
DB01472	Target_318	agonist	activate
DB01481	Target_146	agonist	activate
DB01497	Target_847	agonist	activate
DB01497	Target_467	agonist	activate
DB01497	Target_696	agonist	activate
DB01497	Target_4137	agonist	activate
DB01497	Target_1716	agonist	activate
DB01535	Target_847	agonist	activate
DB01535	Target_467	agonist	activate
DB01535	Target_696	agonist	activate
DB01536	Target_217	inducer	activate
DB01536	Target_2972	inducer	activate
DB01536	Target_650	inducer	activate
DB01541	Target_146	agonist	activate
DB01544	Target_811	agonist	activate
DB01544	Target_530	agonist	activate
DB01565	Target_847	agonist	activate
DB01565	Target_467	agonist	activate
DB01565	Target_696	agonist	activate
DB01565	Target_1716	agonist	activate
DB01565	Target_1262	agonist	activate
DB01571	Target_847	agonist	activate
DB01571	Target_467	agonist	activate
DB01571	Target_696	agonist	activate
DB01576	Target_131	inducer	activate
DB01576	Target_1636	agonist	activate
DB01577	Target_1636	agonist	activate
DB01577	Target_318	agonist	activate
DB01577	Target_629	agonist	activate
DB01577	Target_378	agonist	activate
DB01579	Target_556	agonist	activate
DB01579	Target_632	agonist	activate
DB01581	Target_758	agonist	activate
DB01581	Target_346	agonist	activate
DB01581	Transporter_1588	inducer	activate
DB01586	Target_686	inducer	activate
DB01586	Enzyme_6013	inducer	activate
DB01586	Transporter_776	inducer	activate
DB01586	Transporter_6139	inducer	activate
DB01586	Transporter_1735	inducer	activate
DB01587	Target_811	agonist	activate
DB01601	Enzyme_6016	inducer	activate
DB01609	Enzyme_4512	inducer	activate
DB01612	Target_613	agonist	activate
DB01613	Target_613	agonist	activate
DB01613	Target_1465	agonist	activate
DB01892	Transporter_1735	inducer	activate
DB02261	Transporter_1588	inducer	activate
DB02638	Target_322	agonist	activate
DB02638	Target_185	stimulator	activate
DB02659	Transporter_776	inducer	activate
DB02659	Transporter_1588	inducer	activate
DB02659	Transporter_862	inducer	activate
DB02659	Transporter_6139	inducer	activate
DB02659	Transporter_6140	inducer	activate
DB02659	Transporter_1735	inducer	activate
DB02659	Transporter_1490	inducer	activate
DB02709	Enzyme_4200	inducer	activate
DB03619	Transporter_776	inducer	activate
DB03882	Target_869	agonist	activate
DB04077	Enzyme_6013	inducer	activate
DB04216	Transporter_862	inducer	activate
DB04216	Transporter_1735	inducer	activate
DB04348	Transporter_776	inducer	activate
DB04348	Transporter_862	inducer	activate
DB04348	Transporter_6139	inducer	activate
DB04348	Transporter_6140	inducer	activate
DB04348	Transporter_1735	inducer	activate
DB04348	Transporter_1490	inducer	activate
DB04552	Target_4132	inducer	activate
DB04573	Target_136	agonist	activate
DB04573	Target_869	agonist	activate
DB04573	Transporter_1588	inducer	activate
DB04574	Target_136	agonist	activate
DB04574	Target_869	agonist	activate
DB04574	Enzyme_4757	inducer	activate
DB04574	Target_136	agonist	activate
DB04630	Enzyme_380	inducer	activate
DB04630	Transporter_1588	inducer	activate
DB04786	Target_814	agonist	activate
DB04816	Enzyme_4200	inducer	activate
DB04827	Enzyme_1757	inducer	activate
DB04840	Target_540	inducer	activate
DB04868	Enzyme_6030	inducer	activate
DB04894	Target_6008	inducer	activate
DB04894	Target_3872	agonist	activate
DB04920	Enzyme_4512	inducer	activate
DB04930	Enzyme_6030	inducer	activate
DB04942	Target_730	agonist	activate
DB04942	Target_229	agonist	activate
DB04948	Target_318	agonist	activate
DB05039	Target_766	agonist	activate
DB05271	Target_638	agonist	activate
DB05271	Target_432	agonist	activate
DB05271	Target_831	agonist	activate
DB05271	Target_163	agonist	activate
DB05271	Target_23	agonist	activate
DB05271	Target_320	agonist	activate
DB06147	Enzyme_3811	inducer	activate
DB06262	Target_556	agonist	activate
DB06262	Target_632	agonist	activate
DB06262	Target_789	agonist	activate
DB06262	Target_318	agonist	activate
DB06262	Target_629	agonist	activate
DB06262	Target_378	agonist	activate
DB06262	Target_193	agonist	activate
DB06262	Target_766	agonist	activate
DB06262	Target_1517	agonist	activate
DB06684	Target_320	agonist	activate
DB06694	Target_556	agonist	activate
DB06694	Target_318	agonist	activate
DB06694	Target_629	agonist	activate
DB06694	Target_632	agonist	activate
DB06694	Target_789	agonist	activate
DB06694	Target_378	agonist	activate
DB06697	Enzyme_4512	inducer	activate
DB06697	Enzyme_6030	inducer	activate
DB06697	Enzyme_6016	inducer	activate
DB06698	Target_492	agonist	activate
DB06706	Target_556	agonist	activate
DB06707	Target_556	agonist	activate
DB06709	Target_51	agonist	activate
DB06710	Target_146	agonist	activate
DB06710	Enzyme_3811	inducer	activate
DB06710	Transporter_6139	inducer	activate
DB06710	Transporter_6142	inducer	activate
DB06710	Target_556	agonist	activate
DB06710	Target_318	agonist	activate
DB06713	Target_614	agonist	activate
DB06714	Target_1636	agonist	activate
DB06732	Enzyme_4200	inducer	activate
DB06781	Target_871	agonist	activate
DB06804	Enzyme_290	inducer	activate
DB00050	Target_226	antagonist	inhibit
DB00104	Enzyme_1757	inhibitor	inhibit
DB00114	Target_280	inhibitor	inhibit
DB00116	Transporter_1735	inhibitor	inhibit
DB00117	Transporter_6151	inhibitor	inhibit
DB00118	Enzyme_6013	inhibitor	inhibit
DB00119	Target_280	inhibitor	inhibit
DB00119	Transporter_489	inhibitor	inhibit
DB00119	Transporter_738	inhibitor	inhibit
DB00119	Transporter_6151	inhibitor	inhibit
DB00119	Transporter_6152	inhibitor	inhibit
DB00120	Transporter_6151	inhibitor	inhibit
DB00122	Transporter_6144	inhibitor	inhibit
DB00122	Transporter_6145	inhibitor	inhibit
DB00122	Transporter_6147	inhibitor	inhibit
DB00122	Transporter_118	inhibitor	inhibit
DB00122	Transporter_833	inhibitor	inhibit
DB00123	Transporter_6151	inhibitor	inhibit
DB00123	Transporter_833	inhibitor	inhibit
DB00125	Transporter_118	inhibitor	inhibit
DB00125	Transporter_6151	inhibitor	inhibit
DB00125	Transporter_833	inhibitor	inhibit
DB00126	Enzyme_3947	inhibitor	inhibit
DB00126	Transporter_833	inhibitor	inhibit
DB00128	Transporter_6151	inhibitor	inhibit
DB00130	Target_1008	antagonist	inhibit
DB00130	Transporter_6151	inhibitor	inhibit
DB00131	Target_4198	antagonist	inhibit
DB00132	Transporter_6151	inhibitor	inhibit
DB00134	Enzyme_3987	inhibitor	inhibit
DB00134	Enzyme_3917	inhibitor	inhibit
DB00134	Transporter_6151	inhibitor	inhibit
DB00135	Transporter_199	inhibitor	inhibit
DB00135	Transporter_6151	inhibitor	inhibit
DB00136	Target_856	antagonist	inhibit
DB00137	Transporter_6151	inhibitor	inhibit
DB00139	Target_170	inhibitor	inhibit
DB00140	Transporter_1729	inhibitor	inhibit
DB00142	Transporter_6151	inhibitor	inhibit
DB00143	Transporter_862	inhibitor	inhibit
DB00143	Transporter_1735	inhibitor	inhibit
DB00145	Target_837	antagonist	inhibit
DB00145	Transporter_6151	inhibitor	inhibit
DB00148	Transporter_118	inhibitor	inhibit
DB00149	Transporter_6151	inhibitor	inhibit
DB00150	Target_4063	inhibitor	inhibit
DB00150	Target_2452	inhibitor	inhibit
DB00150	Target_252	inhibitor	inhibit
DB00150	Enzyme_2452	inhibitor	inhibit
DB00150	Enzyme_4063	inhibitor	inhibit
DB00150	Enzyme_252	inhibitor	inhibit
DB00150	Transporter_199	inhibitor	inhibit
DB00150	Transporter_6151	inhibitor	inhibit
DB00151	Transporter_6151	inhibitor	inhibit
DB00152	Transporter_6144	inhibitor	inhibit
DB00152	Transporter_6145	inhibitor	inhibit
DB00152	Transporter_118	inhibitor	inhibit
DB00154	Target_20	inhibitor	inhibit
DB00156	Transporter_6151	inhibitor	inhibit
DB00158	Transporter_2164	inhibitor	inhibit
DB00158	Transporter_1729	inhibitor	inhibit
DB00159	Target_290	inhibitor	inhibit
DB00159	Target_20	inhibitor	inhibit
DB00159	Target_1395	inhibitor	inhibit
DB00159	Target_280	inhibitor	inhibit
DB00159	Transporter_6151	inhibitor	inhibit
DB00161	Transporter_6151	inhibitor	inhibit
DB00162	Enzyme_6024	inhibitor	inhibit
DB00162	Enzyme_904	inhibitor	inhibit
DB00162	Enzyme_905	inhibitor	inhibit
DB00162	Enzyme_6024	inhibitor	inhibit
DB00166	Enzyme_4120	inhibitor	inhibit
DB00167	Transporter_6151	inhibitor	inhibit
DB00168	Transporter_1729	inhibitor	inhibit
DB00168	Transporter_6142	inhibitor	inhibit
DB00168	Transporter_1024	inhibitor	inhibit
DB00169	Enzyme_6024	inhibitor	inhibit
DB00169	Enzyme_6030	inhibitor	inhibit
DB00169	Enzyme_6016	inhibitor	inhibit
DB00169	Enzyme_4924	inhibitor	inhibit
DB00169	Enzyme_4757	inhibitor	inhibit
DB00169	Enzyme_4119	inhibitor	inhibit
DB00169	Enzyme_6020	inhibitor	inhibit
DB00169	Enzyme_5718	inhibitor	inhibit
DB00171	Target_484	inhibitor	inhibit
DB00171	Target_17	inhibitor	inhibit
DB00172	Transporter_6151	inhibitor	inhibit
DB00173	Enzyme_6022	inhibitor	inhibit
DB00174	Transporter_6151	inhibitor	inhibit
DB00175	Target_631	inhibitor	inhibit
DB00175	Enzyme_4924	inhibitor	inhibit
DB00175	Enzyme_4757	inhibitor	inhibit
DB00175	Enzyme_4119	inhibitor	inhibit
DB00175	Enzyme_4512	inhibitor	inhibit
DB00175	Transporter_1632	inhibitor	inhibit
DB00175	Transporter_1588	inhibitor	inhibit
DB00175	Transporter_6139	inhibitor	inhibit
DB00175	Transporter_1729	inhibitor	inhibit
DB00175	Transporter_6142	inhibitor	inhibit
DB00175	Transporter_1735	inhibitor	inhibit
DB00175	Transporter_1024	inhibitor	inhibit
DB00175	Transporter_1732	inhibitor	inhibit
DB00175	Transporter_6143	inhibitor	inhibit
DB00175	Transporter_1490	inhibitor	inhibit
DB00175	Target_824	inhibitor	inhibit
DB00175	Enzyme_4119	inhibitor	inhibit
DB00175	Enzyme_4200	inhibitor	inhibit
DB00175	Enzyme_6024	inhibitor	inhibit
DB00175	Enzyme_4512	inhibitor	inhibit
DB00175	Enzyme_4118	inhibitor	inhibit
DB00175	Enzyme_6107	inhibitor	inhibit
DB00175	Enzyme_4757	inhibitor	inhibit
DB00175	Enzyme_6016	inhibitor	inhibit
DB00175	Enzyme_6030	inhibitor	inhibit
DB00175	Transporter_1588	inhibitor	inhibit
DB00177	Target_70	antagonist	inhibit
DB00177	Enzyme_4757	inhibitor	inhibit
DB00177	Target_244	inhibitor	inhibit
DB00177	Enzyme_3923	inhibitor	inhibit
DB00179	Target_275	inhibitor	inhibit
DB00179	Enzyme_6182	inhibitor	inhibit
DB00180	Transporter_6142	inhibitor	inhibit
DB00182	Target_131	inhibitor	inhibit
DB00182	Target_713	negative modulator	inhibit
DB00182	Enzyme_4119	inhibitor	inhibit
DB00182	Enzyme_5718	inhibitor	inhibit
DB00182	Transporter_6147	inhibitor	inhibit
DB00182	Transporter_118	inhibitor	inhibit
DB00184	Enzyme_5718	inhibitor	inhibit
DB00184	Enzyme_6013	inhibitor	inhibit
DB00184	Enzyme_3941	inhibitor	inhibit
DB00184	Enzyme_3939	inhibitor	inhibit
DB00184	Transporter_6144	inhibitor	inhibit
DB00184	Transporter_6145	inhibitor	inhibit
DB00184	Transporter_6147	inhibitor	inhibit
DB00184	Transporter_118	inhibitor	inhibit
DB00184	Transporter_833	inhibitor	inhibit
DB00187	Target_193	antagonist	inhibit
DB00188	Target_522	inhibitor	inhibit
DB00188	Target_4101	antagonist	inhibit
DB00188	Target_4102	antagonist	inhibit
DB00188	Target_4103	antagonist	inhibit
DB00188	Target_515	inhibitor	inhibit
DB00188	Enzyme_4512	inhibitor	inhibit
DB00188	Enzyme_6016	inhibitor	inhibit
DB00188	Enzyme_4119	inhibitor	inhibit
DB00188	Enzyme_4757	inhibitor	inhibit
DB00188	Enzyme_6024	inhibitor	inhibit
DB00188	Enzyme_4924	inhibitor	inhibit
DB00188	Transporter_6146	inhibitor	inhibit
DB00190	Target_3876	inhibitor	inhibit
DB00191	Target_540	inhibitor	inhibit
DB00191	Target_824	inhibitor	inhibit
DB00191	Target_713	inhibitor	inhibit
DB00191	Target_3941	antagonist	inhibit
DB00191	Target_3939	antagonist	inhibit
DB00191	Enzyme_3941	inhibitor	inhibit
DB00191	Enzyme_3939	inhibitor	inhibit
DB00191	Enzyme_4200	inhibitor	inhibit
DB00191	Enzyme_4757	inhibitor	inhibit
DB00191	Enzyme_4119	inhibitor	inhibit
DB00192	Target_220	inhibitor	inhibit
DB00193	Target_540	inhibitor	inhibit
DB00193	Target_824	inhibitor	inhibit
DB00193	Target_590	antagonist	inhibit
DB00193	Target_706	antagonist	inhibit
DB00193	Target_51	antagonist	inhibit
DB00193	Enzyme_4119	inhibitor	inhibit
DB00193	Enzyme_4512	inhibitor	inhibit
DB00194	Target_4104	inhibitor	inhibit
DB00195	Target_193	antagonist	inhibit
DB00195	Target_766	antagonist	inhibit
DB00195	Enzyme_4119	inhibitor	inhibit
DB00196	Target_260	inhibitor	inhibit
DB00196	Enzyme_4512	inhibitor	inhibit
DB00196	Enzyme_4757	inhibitor	inhibit
DB00196	Enzyme_6016	inhibitor	inhibit
DB00196	Enzyme_4118	inhibitor	inhibit
DB00196	Enzyme_6107	inhibitor	inhibit
DB00196	Enzyme_805	inhibitor	inhibit
DB00196	Transporter_1588	inhibitor	inhibit
DB00197	Target_1457	inhibitor	inhibit
DB00197	Target_267	antagonist	inhibit
DB00197	Target_2222	inhibitor	inhibit
DB00197	Enzyme_4512	inhibitor	inhibit
DB00197	Enzyme_4924	inhibitor	inhibit
DB00197	Enzyme_6016	inhibitor	inhibit
DB00197	Enzyme_3811	inhibitor	inhibit
DB00197	Enzyme_4757	inhibitor	inhibit
DB00197	Enzyme_4118	inhibitor	inhibit
DB00197	Enzyme_6107	inhibitor	inhibit
DB00197	Transporter_776	inhibitor	inhibit
DB00197	Transporter_1490	inhibitor	inhibit
DB00198	Target_641	inhibitor	inhibit
DB00198	Target_1141	inhibitor	inhibit
DB00198	Target_5482	inhibitor	inhibit
DB00199	Target_4237	inhibitor	inhibit
DB00199	Target_4238	inhibitor	inhibit
DB00199	Enzyme_4512	inhibitor	inhibit
DB00199	Enzyme_6107	inhibitor	inhibit
DB00199	Enzyme_4118	inhibitor	inhibit
DB00199	Enzyme_4200	inhibitor	inhibit
DB00199	Transporter_1588	inhibitor	inhibit
DB00199	Transporter_862	inhibitor	inhibit
DB00199	Transporter_6139	inhibitor	inhibit
DB00199	Transporter_6143	inhibitor	inhibit
DB00201	Target_16	antagonist	inhibit
DB00201	Target_1178	antagonist	inhibit
DB00201	Target_541	inhibitor	inhibit
DB00201	Enzyme_4200	inhibitor	inhibit
DB00201	Enzyme_4512	inhibitor	inhibit
DB00201	Enzyme_6024	inhibitor	inhibit
DB00201	Transporter_1588	inhibitor	inhibit
DB00203	Target_204	inhibitor	inhibit
DB00203	Target_6037	inhibitor	inhibit
DB00203	Target_6038	inhibitor	inhibit
DB00203	Enzyme_4512	inhibitor	inhibit
DB00203	Enzyme_6016	inhibitor	inhibit
DB00203	Enzyme_4119	inhibitor	inhibit
DB00203	Enzyme_6024	inhibitor	inhibit
DB00203	Enzyme_6013	inhibitor	inhibit
DB00203	Transporter_2164	inhibitor	inhibit
DB00203	Transporter_6136	inhibitor	inhibit
DB00203	Transporter_6148	inhibitor	inhibit
DB00204	Target_101	inhibitor	inhibit
DB00204	Target_233	inhibitor	inhibit
DB00204	Target_1968	inhibitor	inhibit
DB00205	Target_365	inhibitor	inhibit
DB00205	Target_620	inhibitor	inhibit
DB00205	Enzyme_4757	inhibitor	inhibit
DB00205	Enzyme_4119	inhibitor	inhibit
DB00205	Enzyme_4924	inhibitor	inhibit
DB00206	Target_131	inhibitor	inhibit
DB00206	Transporter_1588	inhibitor	inhibit
DB00206	Transporter_6145	inhibitor	inhibit
DB00206	Transporter_776	inhibitor	inhibit
DB00206	Transporter_1735	inhibitor	inhibit
DB00207	Target_4238	inhibitor	inhibit
DB00207	Target_4237	inhibitor	inhibit
DB00207	Enzyme_5718	inhibitor	inhibit
DB00207	Enzyme_4512	inhibitor	inhibit
DB00207	Transporter_1588	inhibitor	inhibit
DB00208	Target_122	antagonist	inhibit
DB00208	Enzyme_6016	inhibitor	inhibit
DB00208	Enzyme_4119	inhibitor	inhibit
DB00208	Enzyme_4757	inhibitor	inhibit
DB00208	Enzyme_4924	inhibitor	inhibit
DB00208	Enzyme_4200	inhibitor	inhibit
DB00208	Enzyme_6024	inhibitor	inhibit
DB00208	Enzyme_6030	inhibitor	inhibit
DB00208	Enzyme_6013	inhibitor	inhibit
DB00209	Target_103	antagonist	inhibit
DB00209	Enzyme_4119	inhibitor	inhibit
DB00211	Enzyme_4119	inhibitor	inhibit
DB00211	Target_298	inhibitor	inhibit
DB00213	Target_385	inhibitor	inhibit
DB00213	Enzyme_6016	inhibitor	inhibit
DB00213	Enzyme_4757	inhibitor	inhibit
DB00213	Transporter_1588	inhibitor	inhibit
DB00213	Transporter_1732	inhibitor	inhibit
DB00213	Transporter_1490	inhibitor	inhibit
DB00214	Target_558	inhibitor	inhibit
DB00214	Enzyme_6016	inhibitor	inhibit
DB00215	Target_824	inhibitor	inhibit
DB00215	Enzyme_6016	inhibitor	inhibit
DB00215	Enzyme_4119	inhibitor	inhibit
DB00215	Enzyme_4200	inhibitor	inhibit
DB00215	Enzyme_6030	inhibitor	inhibit
DB00215	Transporter_1588	inhibitor	inhibit
DB00215	Transporter_713	inhibitor	inhibit
DB00215	Transporter_540	inhibitor	inhibit
DB00215	Transporter_824	inhibitor	inhibit
DB00217	Target_709	inhibitor	inhibit
DB00218	Target_477	inhibitor	inhibit
DB00218	Target_404	inhibitor	inhibit
DB00218	Target_817	inhibitor	inhibit
DB00219	Target_103	antagonist	inhibit
DB00220	Target_731	inhibitor	inhibit
DB00220	Enzyme_6030	inhibitor	inhibit
DB00220	Enzyme_6016	inhibitor	inhibit
DB00220	Enzyme_4512	inhibitor	inhibit
DB00220	Enzyme_6107	inhibitor	inhibit
DB00220	Enzyme_4118	inhibitor	inhibit
DB00220	Enzyme_4200	inhibitor	inhibit
DB00220	Enzyme_4757	inhibitor	inhibit
DB00220	Enzyme_4119	inhibitor	inhibit
DB00220	Transporter_1588	inhibitor	inhibit
DB00220	Transporter_6145	inhibitor	inhibit
DB00220	Transporter_6139	inhibitor	inhibit
DB00220	Transporter_1732	inhibitor	inhibit
DB00220	Transporter_1490	inhibitor	inhibit
DB00222	Target_781	inhibitor	inhibit
DB00222	Target_709	inhibitor	inhibit
DB00224	Target_731	inhibitor	inhibit
DB00224	Enzyme_4512	inhibitor	inhibit
DB00224	Enzyme_6107	inhibitor	inhibit
DB00224	Enzyme_4118	inhibitor	inhibit
DB00224	Enzyme_6016	inhibitor	inhibit
DB00224	Enzyme_4757	inhibitor	inhibit
DB00224	Enzyme_4119	inhibitor	inhibit
DB00224	Transporter_1588	inhibitor	inhibit
DB00224	Transporter_6145	inhibitor	inhibit
DB00224	Transporter_862	inhibitor	inhibit
DB00224	Transporter_6139	inhibitor	inhibit
DB00224	Transporter_1490	inhibitor	inhibit
DB00227	Target_631	inhibitor	inhibit
DB00227	Enzyme_4512	inhibitor	inhibit
DB00227	Enzyme_4924	inhibitor	inhibit
DB00227	Enzyme_4757	inhibitor	inhibit
DB00227	Enzyme_6016	inhibitor	inhibit
DB00227	Enzyme_4119	inhibitor	inhibit
DB00227	Transporter_1588	inhibitor	inhibit
DB00227	Transporter_6139	inhibitor	inhibit
DB00227	Transporter_1490	inhibitor	inhibit
DB00228	Target_610	inhibitor	inhibit
DB00228	Target_705	antagonist	inhibit
DB00228	Target_241	inhibitor	inhibit
DB00228	Transporter_1729	inhibitor	inhibit
DB00230	Target_392	inhibitor	inhibit
DB00232	Target_558	inhibitor	inhibit
DB00232	Target_295	inhibitor	inhibit
DB00232	Target_357	inhibitor	inhibit
DB00232	Target_592	inhibitor	inhibit
DB00233	Target_290	inhibitor	inhibit
DB00233	Target_275	inhibitor	inhibit
DB00233	Enzyme_1757	inhibitor	inhibit
DB00234	Target_540	inhibitor	inhibit
DB00234	Enzyme_4119	inhibitor	inhibit
DB00234	Transporter_1588	inhibitor	inhibit
DB00235	Target_485	inhibitor	inhibit
DB00237	Target_947	antagonist	inhibit
DB00237	Target_4095	antagonist	inhibit
DB00237	Target_921	antagonist	inhibit
DB00237	Target_918	antagonist	inhibit
DB00238	Enzyme_4512	inhibitor	inhibit
DB00238	Enzyme_4757	inhibitor	inhibit
DB00238	Enzyme_4119	inhibitor	inhibit
DB00238	Enzyme_4200	inhibitor	inhibit
DB00239	Target_260	inhibitor	inhibit
DB00241	Target_947	antagonist	inhibit
DB00241	Target_4095	antagonist	inhibit
DB00241	Target_921	antagonist	inhibit
DB00241	Target_918	antagonist	inhibit
DB00242	Target_360	inhibitor	inhibit
DB00242	Target_4218	inhibitor	inhibit
DB00242	Target_6108	inhibitor	inhibit
DB00242	Target_603	inhibitor	inhibit
DB00242	Target_6109	inhibitor	inhibit
DB00242	Target_6110	inhibitor	inhibit
DB00242	Target_6112	inhibitor	inhibit
DB00242	Target_6111	inhibitor	inhibit
DB00242	Target_220	inhibitor	inhibit
DB00242	Target_1995	inhibitor	inhibit
DB00242	Enzyme_4119	inhibitor	inhibit
DB00244	Target_290	inhibitor	inhibit
DB00244	Target_20	inhibitor	inhibit
DB00244	Target_275	inhibitor	inhibit
DB00244	Target_2038	inhibitor	inhibit
DB00245	Target_103	antagonist	inhibit
DB00245	Target_713	inhibitor	inhibit
DB00245	Target_492	antagonist	inhibit
DB00246	Target_831	antagonist	inhibit
DB00246	Target_502	antagonist	inhibit
DB00246	Target_23	antagonist	inhibit
DB00246	Target_163	antagonist	inhibit
DB00246	Target_638	antagonist	inhibit
DB00246	Target_432	antagonist	inhibit
DB00246	Target_320	antagonist	inhibit
DB00246	Target_885	antagonist	inhibit
DB00246	Target_725	antagonist	inhibit
DB00246	Target_528	antagonist	inhibit
DB00246	Target_590	antagonist	inhibit
DB00246	Target_341	antagonist	inhibit
DB00246	Target_1256	antagonist	inhibit
DB00246	Target_716	antagonist	inhibit
DB00246	Target_492	antagonist	inhibit
DB00246	Target_556	antagonist	inhibit
DB00246	Target_632	antagonist	inhibit
DB00246	Target_318	antagonist	inhibit
DB00246	Target_629	antagonist	inhibit
DB00246	Target_378	antagonist	inhibit
DB00246	Target_103	antagonist	inhibit
DB00246	Target_617	antagonist	inhibit
DB00246	Target_51	antagonist	inhibit
DB00246	Target_450	antagonist	inhibit
DB00246	Target_274	antagonist	inhibit
DB00246	Enzyme_4512	inhibitor	inhibit
DB00246	Enzyme_4119	inhibitor	inhibit
DB00247	Target_436	antagonist	inhibit
DB00247	Target_590	antagonist	inhibit
DB00247	Target_502	antagonist	inhibit
DB00247	Target_716	antagonist	inhibit
DB00248	Target_629	antagonist	inhibit
DB00248	Target_318	antagonist	inhibit
DB00248	Target_378	antagonist	inhibit
DB00248	Target_716	antagonist	inhibit
DB00248	Enzyme_4512	inhibitor	inhibit
DB00250	Target_3808	inhibitor	inhibit
DB00250	Target_3807	inhibitor	inhibit
DB00251	Target_260	antagonist	inhibit
DB00252	Target_220	inhibitor	inhibit
DB00252	Target_158	inhibitor	inhibit
DB00252	Enzyme_4757	inhibitor	inhibit
DB00252	Enzyme_805	inhibitor	inhibit
DB00252	Transporter_6158	inhibitor	inhibit
DB00252	Target_140	inhibitor	inhibit
DB00252	Target_22	inhibitor	inhibit
DB00252	Enzyme_4512	inhibitor	inhibit
DB00252	Transporter_1729	inhibitor	inhibit
DB00252	Transporter_6142	inhibitor	inhibit
DB00252	Transporter_1024	inhibitor	inhibit
DB00255	Enzyme_5718	inhibitor	inhibit
DB00255	Enzyme_4512	inhibitor	inhibit
DB00255	Enzyme_4924	inhibitor	inhibit
DB00255	Enzyme_4757	inhibitor	inhibit
DB00255	Enzyme_6013	inhibitor	inhibit
DB00255	Transporter_1732	inhibitor	inhibit
DB00255	Target_140	inhibitor	inhibit
DB00255	Target_22	inhibitor	inhibit
DB00257	Target_260	antagonist	inhibit
DB00257	Target_260	inhibitor	inhibit
DB00257	Target_462	inhibitor	inhibit
DB00257	Enzyme_4924	inhibitor	inhibit
DB00257	Enzyme_4512	inhibitor	inhibit
DB00257	Enzyme_6030	inhibitor	inhibit
DB00257	Enzyme_6017	inhibitor	inhibit
DB00257	Enzyme_4200	inhibitor	inhibit
DB00257	Enzyme_4119	inhibitor	inhibit
DB00257	Enzyme_805	inhibitor	inhibit
DB00257	Enzyme_3811	inhibitor	inhibit
DB00257	Enzyme_5718	inhibitor	inhibit
DB00257	Enzyme_6016	inhibitor	inhibit
DB00257	Enzyme_4757	inhibitor	inhibit
DB00257	Enzyme_6013	inhibitor	inhibit
DB00257	Transporter_1588	inhibitor	inhibit
DB00259	Target_891	inhibitor	inhibit
DB00259	Enzyme_6016	inhibitor	inhibit
DB00259	Enzyme_4757	inhibitor	inhibit
DB00259	Enzyme_4119	inhibitor	inhibit
DB00259	Enzyme_6013	inhibitor	inhibit
DB00259	Enzyme_4512	inhibitor	inhibit
DB00260	Target_807	inhibitor	inhibit
DB00260	Target_894	inhibitor	inhibit
DB00260	Enzyme_3876	inhibitor	inhibit
DB00260	Target_485	inhibitor	inhibit
DB00262	Target_714	inhibitor	inhibit
DB00263	Target_891	inhibitor	inhibit
DB00263	Enzyme_4757	inhibitor	inhibit
DB00264	Target_193	antagonist	inhibit
DB00264	Target_766	antagonist	inhibit
DB00264	Enzyme_4119	inhibitor	inhibit
DB00264	Transporter_6144	inhibitor	inhibit
DB00264	Transporter_1588	inhibitor	inhibit
DB00266	Target_787	inhibitor	inhibit
DB00266	Target_2157	inhibitor	inhibit
DB00266	Target_2159	inhibitor	inhibit
DB00266	Enzyme_4757	inhibitor	inhibit
DB00267	Target_633	inhibitor	inhibit
DB00267	Target_4155	inhibitor	inhibit
DB00268	Enzyme_4200	inhibitor	inhibit
DB00268	Enzyme_4119	inhibitor	inhibit
DB00270	Target_478	inhibitor	inhibit
DB00270	Target_762	inhibitor	inhibit
DB00270	Target_4110	inhibitor	inhibit
DB00270	Target_964	inhibitor	inhibit
DB00270	Target_4160	inhibitor	inhibit
DB00270	Target_4115	inhibitor	inhibit
DB00270	Target_4111	inhibitor	inhibit
DB00270	Enzyme_4512	inhibitor	inhibit
DB00273	Target_158	inhibitor	inhibit
DB00273	Target_382	antagonist	inhibit
DB00273	Target_357	inhibitor	inhibit
DB00273	Target_592	inhibitor	inhibit
DB00273	Enzyme_6016	inhibitor	inhibit
DB00274	Target_6067	inhibitor	inhibit
DB00274	Target_645	inhibitor	inhibit
DB00274	Target_543	inhibitor	inhibit
DB00274	Target_4155	inhibitor	inhibit
DB00274	Target_3760	inhibitor	inhibit
DB00274	Target_6184	inhibitor	inhibit
DB00274	Transporter_1539	inhibitor	inhibit
DB00274	Transporter_1974	inhibitor	inhibit
DB00274	Target_70	antagonist	inhibit
DB00276	Target_817	inhibitor	inhibit
DB00276	Target_101	inhibitor	inhibit
DB00276	Transporter_1588	inhibitor	inhibit
DB00277	Target_16	antagonist	inhibit
DB00277	Target_1178	antagonist	inhibit
DB00277	Target_268	antagonist	inhibit
DB00277	Target_541	inhibitor	inhibit
DB00277	Target_204	inhibitor	inhibit
DB00277	Target_1971	inhibitor	inhibit
DB00277	Target_485	inhibitor	inhibit
DB00277	Enzyme_4200	inhibitor	inhibit
DB00277	Enzyme_3957	inhibitor	inhibit
DB00277	Enzyme_6024	inhibitor	inhibit
DB00277	Transporter_6143	inhibitor	inhibit
DB00278	Target_54	inhibitor	inhibit
DB00279	Transporter_6158	inhibitor	inhibit
DB00279	Transporter_6153	inhibitor	inhibit
DB00279	Transporter_6142	inhibitor	inhibit
DB00279	Transporter_6151	inhibitor	inhibit
DB00279	Target_220	inhibitor	inhibit
DB00279	Target_103	antagonist	inhibit
DB00279	Target_617	antagonist	inhibit
DB00279	Target_51	antagonist	inhibit
DB00279	Target_6098	inhibitor	inhibit
DB00279	Target_6099	inhibitor	inhibit
DB00279	Transporter_6145	inhibitor	inhibit
DB00279	Transporter_6144	inhibitor	inhibit
DB00281	Target_198	inhibitor	inhibit
DB00281	Target_1995	inhibitor	inhibit
DB00281	Target_220	inhibitor	inhibit
DB00281	Target_844	antagonist	inhibit
DB00281	Enzyme_4512	inhibitor	inhibit
DB00281	Enzyme_4119	inhibitor	inhibit
DB00281	Enzyme_4200	inhibitor	inhibit
DB00281	Transporter_118	inhibitor	inhibit
DB00281	Transporter_1588	inhibitor	inhibit
DB00282	Target_853	inhibitor	inhibit
DB00283	Target_492	antagonist	inhibit
DB00283	Enzyme_4119	inhibitor	inhibit
DB00283	Enzyme_4512	inhibitor	inhibit
DB00284	Target_929	inhibitor	inhibit
DB00284	Target_4513	inhibitor	inhibit
DB00284	Target_1016	inhibitor	inhibit
DB00284	Target_2129	inhibitor	inhibit
DB00285	Target_824	inhibitor	inhibit
DB00285	Target_540	inhibitor	inhibit
DB00285	Target_713	inhibitor	inhibit
DB00285	Enzyme_4119	inhibitor	inhibit
DB00285	Enzyme_4512	inhibitor	inhibit
DB00285	Enzyme_6030	inhibitor	inhibit
DB00285	Transporter_1588	inhibitor	inhibit
DB00289	Enzyme_4119	inhibitor	inhibit
DB00289	Enzyme_4512	inhibitor	inhibit
DB00290	Target_222	inhibitor	inhibit
DB00290	Target_187	inhibitor	inhibit
DB00291	Enzyme_805	inhibitor	inhibit
DB00291	Enzyme_6023	inhibitor	inhibit
DB00291	Enzyme_3811	inhibitor	inhibit
DB00293	Target_359	inhibitor	inhibit
DB00293	Target_773	antagonist	inhibit
DB00295	Transporter_1588	inhibitor	inhibit
DB00296	Target_198	inhibitor	inhibit
DB00297	Target_198	inhibitor	inhibit
DB00298	Target_556	antagonist	inhibit
DB00298	Target_789	antagonist	inhibit
DB00298	Target_632	antagonist	inhibit
DB00299	Target_338	inhibitor	inhibit
DB00300	Enzyme_4200	inhibitor	inhibit
DB00301	Target_633	inhibitor	inhibit
DB00302	Target_234	inhibitor	inhibit
DB00302	Target_115	inhibitor	inhibit
DB00302	Target_6069	inhibitor	inhibit
DB00302	Target_1	inhibitor	inhibit
DB00302	Target_4155	inhibitor	inhibit
DB00302	Target_819	inhibitor	inhibit
DB00302	Target_645	inhibitor	inhibit
DB00302	Target_543	inhibitor	inhibit
DB00302	Target_6184	inhibitor	inhibit
DB00305	Transporter_1588	inhibitor	inhibit
DB00306	Target_947	antagonist	inhibit
DB00306	Target_4095	antagonist	inhibit
DB00306	Target_921	antagonist	inhibit
DB00306	Target_918	antagonist	inhibit
DB00308	Target_101	inhibitor	inhibit
DB00308	Target_172	inhibitor	inhibit
DB00308	Target_751	inhibitor	inhibit
DB00308	Target_514	inhibitor	inhibit
DB00308	Target_772	inhibitor	inhibit
DB00308	Target_781	inhibitor	inhibit
DB00309	Target_29	inhibitor	inhibit
DB00310	Target_558	inhibitor	inhibit
DB00311	Target_295	inhibitor	inhibit
DB00311	Target_357	inhibitor	inhibit
DB00311	Target_592	inhibitor	inhibit
DB00311	Target_6126	inhibitor	inhibit
DB00311	Transporter_1729	inhibitor	inhibit
DB00312	Target_947	antagonist	inhibit
DB00312	Target_4095	antagonist	inhibit
DB00312	Target_921	antagonist	inhibit
DB00312	Target_918	antagonist	inhibit
DB00313	Target_280	inhibitor	inhibit
DB00313	Target_1039	inhibitor	inhibit
DB00313	Target_630	inhibitor	inhibit
DB00313	Enzyme_4757	inhibitor	inhibit
DB00313	Enzyme_4200	inhibitor	inhibit
DB00313	Enzyme_6106	inhibitor	inhibit
DB00313	Enzyme_6016	inhibitor	inhibit
DB00313	Enzyme_4924	inhibitor	inhibit
DB00313	Enzyme_4512	inhibitor	inhibit
DB00313	Transporter_118	inhibitor	inhibit
DB00313	Transporter_1729	inhibitor	inhibit
DB00313	Transporter_6142	inhibitor	inhibit
DB00316	Target_290	inhibitor	inhibit
DB00316	Target_20	inhibitor	inhibit
DB00316	Enzyme_4512	inhibitor	inhibit
DB00316	Enzyme_6102	inhibitor	inhibit
DB00316	Transporter_1588	inhibitor	inhibit
DB00316	Transporter_1729	inhibitor	inhibit
DB00317	Target_844	antagonist	inhibit
DB00317	Enzyme_4119	inhibitor	inhibit
DB00317	Transporter_1588	inhibitor	inhibit
DB00317	Transporter_1732	inhibitor	inhibit
DB00318	Enzyme_4119	inhibitor	inhibit
DB00319	Target_6121	inhibitor	inhibit
DB00319	Target_6844	inhibitor	inhibit
DB00319	Transporter_1729	inhibitor	inhibit
DB00320	Enzyme_4512	inhibitor	inhibit
DB00320	Transporter_1588	inhibitor	inhibit
DB00321	Target_540	inhibitor	inhibit
DB00321	Target_824	inhibitor	inhibit
DB00321	Target_502	antagonist	inhibit
DB00321	Target_556	antagonist	inhibit
DB00321	Target_789	antagonist	inhibit
DB00321	Target_318	antagonist	inhibit
DB00321	Target_492	antagonist	inhibit
DB00321	Target_103	antagonist	inhibit
DB00321	Target_617	antagonist	inhibit
DB00321	Target_51	antagonist	inhibit
DB00321	Target_450	antagonist	inhibit
DB00321	Target_274	antagonist	inhibit
DB00321	Target_1086	inhibitor	inhibit
DB00321	Target_858	inhibitor	inhibit
DB00321	Target_6098	inhibitor	inhibit
DB00321	Target_6099	inhibitor	inhibit
DB00321	Enzyme_4119	inhibitor	inhibit
DB00321	Enzyme_6016	inhibitor	inhibit
DB00321	Enzyme_4924	inhibitor	inhibit
DB00321	Enzyme_6013	inhibitor	inhibit
DB00321	Transporter_1588	inhibitor	inhibit
DB00323	Target_3810	inhibitor	inhibit
DB00323	Enzyme_4757	inhibitor	inhibit
DB00324	Enzyme_6024	inhibitor	inhibit
DB00324	Enzyme_4200	inhibitor	inhibit
DB00328	Target_20	inhibitor	inhibit
DB00328	Target_290	inhibitor	inhibit
DB00328	Target_2981	inhibitor	inhibit
DB00328	Target_6042	inhibitor	inhibit
DB00328	Target_1313	inhibitor	inhibit
DB00328	Enzyme_6016	inhibitor	inhibit
DB00328	Enzyme_6022	inhibitor	inhibit
DB00328	Enzyme_6178	inhibitor	inhibit
DB00328	Transporter_1709	inhibitor	inhibit
DB00328	Transporter_2164	inhibitor	inhibit
DB00328	Transporter_6137	inhibitor	inhibit
DB00328	Transporter_1588	inhibitor	inhibit
DB00328	Transporter_862	inhibitor	inhibit
DB00328	Transporter_6139	inhibitor	inhibit
DB00328	Transporter_1729	inhibitor	inhibit
DB00328	Transporter_6142	inhibitor	inhibit
DB00328	Transporter_1735	inhibitor	inhibit
DB00328	Transporter_6155	inhibitor	inhibit
DB00328	Transporter_1024	inhibitor	inhibit
DB00328	Target_649	inhibitor	inhibit
DB00328	Target_135	inhibitor	inhibit
DB00328	Target_37	inhibitor	inhibit
DB00331	Transporter_6144	inhibitor	inhibit
DB00331	Transporter_6145	inhibitor	inhibit
DB00331	Transporter_6154	inhibitor	inhibit
DB00332	Target_103	antagonist	inhibit
DB00332	Target_617	antagonist	inhibit
DB00332	Target_51	antagonist	inhibit
DB00333	Target_706	antagonist	inhibit
DB00333	Target_458	antagonist	inhibit
DB00333	Enzyme_4512	inhibitor	inhibit
DB00333	Enzyme_4119	inhibitor	inhibit
DB00333	Transporter_1588	inhibitor	inhibit
DB00334	Target_502	antagonist	inhibit
DB00334	Target_831	antagonist	inhibit
DB00334	Target_23	antagonist	inhibit
DB00334	Target_163	antagonist	inhibit
DB00334	Target_638	antagonist	inhibit
DB00334	Target_432	antagonist	inhibit
DB00334	Target_320	antagonist	inhibit
DB00334	Target_885	antagonist	inhibit
DB00334	Target_725	antagonist	inhibit
DB00334	Target_528	antagonist	inhibit
DB00334	Target_590	antagonist	inhibit
DB00334	Target_341	antagonist	inhibit
DB00334	Target_1256	antagonist	inhibit
DB00334	Target_716	antagonist	inhibit
DB00334	Target_492	antagonist	inhibit
DB00334	Target_556	antagonist	inhibit
DB00334	Target_632	antagonist	inhibit
DB00334	Target_318	antagonist	inhibit
DB00334	Target_629	antagonist	inhibit
DB00334	Target_378	antagonist	inhibit
DB00334	Target_103	antagonist	inhibit
DB00334	Target_617	antagonist	inhibit
DB00334	Target_51	antagonist	inhibit
DB00334	Target_450	antagonist	inhibit
DB00334	Target_274	antagonist	inhibit
DB00334	Enzyme_4119	inhibitor	inhibit
DB00334	Enzyme_6016	inhibitor	inhibit
DB00334	Enzyme_4757	inhibitor	inhibit
DB00334	Enzyme_4512	inhibitor	inhibit
DB00334	Target_193	antagonist	inhibit
DB00334	Transporter_1588	inhibitor	inhibit
DB00336	Target_845	inhibitor	inhibit
DB00336	Target_327	inhibitor	inhibit
DB00336	Target_63	inhibitor	inhibit
DB00336	Target_893	inhibitor	inhibit
DB00338	Target_385	inhibitor	inhibit
DB00338	Enzyme_6016	inhibitor	inhibit
DB00338	Enzyme_4512	inhibitor	inhibit
DB00338	Enzyme_4200	inhibitor	inhibit
DB00338	Enzyme_4757	inhibitor	inhibit
DB00338	Enzyme_4119	inhibitor	inhibit
DB00338	Enzyme_6017	inhibitor	inhibit
DB00338	Transporter_1588	inhibitor	inhibit
DB00338	Transporter_1732	inhibitor	inhibit
DB00339	Target_6032	inhibitor	inhibit
DB00340	Target_103	antagonist	inhibit
DB00340	Target_450	antagonist	inhibit
DB00340	Target_274	antagonist	inhibit
DB00340	Target_617	antagonist	inhibit
DB00340	Target_51	antagonist	inhibit
DB00341	Target_492	antagonist	inhibit
DB00342	Target_492	antagonist	inhibit
DB00342	Target_101	inhibitor	inhibit
DB00342	Target_51	antagonist	inhibit
DB00342	Enzyme_4512	inhibitor	inhibit
DB00342	Enzyme_4119	inhibitor	inhibit
DB00342	Enzyme_4924	inhibitor	inhibit
DB00342	Enzyme_6182	inhibitor	inhibit
DB00342	Transporter_1588	inhibitor	inhibit
DB00343	Target_750	inhibitor	inhibit
DB00343	Enzyme_4512	inhibitor	inhibit
DB00343	Enzyme_4118	inhibitor	inhibit
DB00343	Enzyme_6107	inhibitor	inhibit
DB00343	Enzyme_4119	inhibitor	inhibit
DB00343	Enzyme_4757	inhibitor	inhibit
DB00343	Transporter_1588	inhibitor	inhibit
DB00344	Target_540	inhibitor	inhibit
DB00344	Target_824	inhibitor	inhibit
DB00344	Transporter_1588	inhibitor	inhibit
DB00345	Transporter_6144	inhibitor	inhibit
DB00345	Transporter_6145	inhibitor	inhibit
DB00345	Transporter_118	inhibitor	inhibit
DB00345	Transporter_1588	inhibitor	inhibit
DB00345	Transporter_1729	inhibitor	inhibit
DB00345	Transporter_6142	inhibitor	inhibit
DB00345	Transporter_1735	inhibitor	inhibit
DB00345	Transporter_833	inhibitor	inhibit
[truncated: 4,009 more rows]

## Sheet: Descriptors
Dragon Descriptors for Drug	PROFEAT Descriptors for Protein
nCIR	[G1.1.1.14]
nN	[G2.1.1.10]
nS	[G2.1.1.13]
nR07	[G2.1.1.29]
nR09	[G2.1.1.33]
nR12	[G2.1.1.34]
D/Dr07	[G2.1.1.39]
MATS8v	[G2.1.1.47]
GATS3m	[G2.1.1.59]
G(N..F)	[G2.1.1.76]
G(N..Cl)	[G2.1.1.109]
RDF010v	[G2.1.1.117]
Mor04m	[G2.1.1.123]
Mor12e	[G2.1.1.134]
Mor12p	[G2.1.1.140]
E2s	[G2.1.1.142]
HATS6u	[G2.1.1.162]
HATSv	[G2.1.1.174]
HATS5e	[G2.1.1.182]
R4u	[G2.1.1.199]
R5v+	[G2.1.1.253]
nCq	[G2.1.1.265]
nCrq	[G2.1.1.280]
nR#CH/X	[G2.1.1.322]
nR#C-	[G2.1.1.342]
nRCOOH	[G2.1.1.360]
nN=C-N<	[G2.1.1.373]
nArNR2	[G2.1.1.377]
nArOH	[G2.1.1.389]
nRSR	[G2.1.1.391]
nSO2N	[G2.1.1.395]
nR=CHX	[G3.1.2.1.1]
nArX	[G3.1.2.1.30]
nCXr	[G3.2.1.1.18]
C-006	[G3.2.4.1.10]
C-016	[G3.3.1.1.22]
C-019	[G3.3.4.1.8]
C-021	[G3.3.4.1.11]
C-022	[G3.3.4.1.22]
C-026	[G4.3.1.11]
C-037	[G4.3.2.6]
C-039	[G4.3.3.5]
H-046	[G4.3.4.4]
N-073	[G4.3.4.10]
F-081	[G4.3.5.1]
F-084	[G4.3.6.2]
S-107	[G4.3.6.5]
	[G5.1.2.2]
	[G5.2.2.5]
	[G5.2.2.17]
	[G7.1.1.5]
	[G7.1.1.68]
	[G7.1.1.72]
