# Supplementary material for: Systems Pharmacology Dissecting Holistic Medicine for Treatment of Complex Diseases: An Example Using Cardiocerebrovascular Diseases Treated by TCM
Source: Evid Based Complement Alternat Med. 2015 May 26;2015:980190. doi: 10.1155/2015/980190 (PMC4460250; doi:10.1155/2015/980190)
Supplement: Supplementary file 1 — Table S1 shows the structure information of 367 compounds in Xinnaoxin Pill. Table S2 and Table S3 respectively represents the information for construction PreHIA and PreAM model. Table S4 displays the detailed information of compound-target interactions. And Table S5 shows the information of the 218 targets in this study. Figure S1 and Figure S2 reveal the workflow for PreHIA and PreAM. [file 980190.f1.zip › mat.980190.v2/Table S4.xls]

## Sheet: Sheet1
Table S4. Information of compound-target interactions )
Compound ID	Compound Name ( represent deglycosylation compounds)	Gene Name	UniProt ID	Target Name	Action Mode (1 Activation; -1 inhibition)
M01	kaempferol	O14732	IMPA2	Inositol monophosphatase 2	-1
M01	kaempferol	O14920	IKBKB	Inhibitor of nuclear factor kappa-B kinase subunit beta	-1
M01	kaempferol	O75469	NR1I2	Nuclear receptor subfamily 1 group I member 2	1
M01	kaempferol	O95749	GGPS1	Geranylgeranyl pyrophosphate synthetase	-1
M01	kaempferol	P01375	TNF	Tumor necrosis factor	-1
M01	kaempferol	P03372	ESR1	Estrogen receptor	-1
M01	kaempferol	P03956	MMP1	Interstitial collagenase	-1
M01	kaempferol	P03973	SLPI	Antileukoproteinase	-1
M01	kaempferol	P04798	CYP1A1	Cytochrome P450 1A1	-1
M01	kaempferol	P05177	CYP1A2	Cytochrome P450 1A2	-1
M01	kaempferol	P05362	ICAM1	Intercellular adhesion molecule 1	-1
M01	kaempferol	P05412	JUN	Transcription factor AP-1	-1
M01	kaempferol	P06213	INSR	Insulin receptor	-1
M01	kaempferol	P06493	CDK1	Cell division control protein 2 homolog	-1
M01	kaempferol	P07900	HSP90AA1	Heat shock protein HSP 90-alpha	-1
M01	kaempferol	P08684	CYP3A4	Cytochrome P450 3A4	-1
M01	kaempferol	P09211	GSTP1	Glutathione S-transferase P	-1
M01	kaempferol	P09488	GSTM1	Glutathione S-transferase Mu 1	-1
M01	kaempferol	P09601	HMOX1	Heme oxygenase 1	-1
M01	kaempferol	P09917	ALOX5	Arachidonate 5-lipoxygenase	-1
M01	kaempferol	P10275	AR	Androgen receptor	-1
M01	kaempferol	P10415	BCL2	Apoptosis regulator Bcl-2	-1
M01	kaempferol	P11309	PIM1	Proto-oncogene serine/threonine-protein kinase Pim-1	-1
M01	kaempferol	P11388	TOP2A	DNA topoisomerase 2-alpha	-1
M01	kaempferol	P11511	CYP19A1	Cytochrome P450 19A1	-1
M01	kaempferol	P14672	SLC2A4	Solute carrier family 2, facilitated glucose transporter member 4	-1
M01	kaempferol	P16581	SELE	E-selectin	-1
M01	kaempferol	P18031	PTPN1	Tyrosine-protein phosphatase non-receptor type 1	-1
M01	kaempferol	P18054	ALOX12	Arachidonate 12-lipoxygenase, 12S-type	-1
M01	kaempferol	P19320	VCAM1	Vascular cell adhesion protein 1	-1
M01	kaempferol	P21397	MAOA	Amine oxidase [flavin-containing] A	-1
M01	kaempferol	P23219	PTGS1	Prostaglandin G/H synthase 1	-1
M01	kaempferol	P24941	CDK2	Cell division protein kinase 2	-1
M01	kaempferol	P27338	MAOB	Amine oxidase [flavin-containing] B	-1
M01	kaempferol	P27487	DPP4	Dipeptidyl peptidase 4	-1
M01	kaempferol	P28161	GSTM2	Glutathione S-transferase Mu 2	-1
M01	kaempferol	P35228	NOS2	Nitric oxide synthase, inducible	-1
M01	kaempferol	P35354	PTGS2	Prostaglandin G/H synthase 2	-1
M01	kaempferol	P35869	AHR	Aryl hydrocarbon receptor	1
M01	kaempferol	P37058	HSD17B3	Estradiol 17-beta-dehydrogenase 3	-1
M01	kaempferol	P37231	PPARG	Peroxisome proliferator-activated receptor gamma	1
M01	kaempferol	P42224	STAT1	Signal transducer and activator of transcription 1-alpha/beta	-1
M01	kaempferol	P42330	AKR1C3	Aldo-keto reductase family 1 member C3	-1
M01	kaempferol	P42336	PIK3CA	Phosphatidylinositol-4,5-bisphosphate 3-kinase catalytic subunit alpha isoform	-1
M01	kaempferol	P42574	CASP3	Caspase-3	-1
M01	kaempferol	P45983	MAPK8	Mitogen-activated protein kinase 8	-1
M01	kaempferol	P47989	XDH	Xanthine dehydrogenase/oxidase	-1
M01	kaempferol	P48736	PIK3CG	Phosphatidylinositol-4,5-bisphosphate 3-kinase catalytic subunit gamma isoform	-1
M01	kaempferol	P49841	GSK3B	Glycogen synthase kinase-3 beta	-1
M01	kaempferol	P49895	DIO1	Type I iodothyronine deiodinase	-1
M01	kaempferol	P67870	CSNK2B	Casein kinase II subunit beta	-1
M01	kaempferol	P68400	CSNK2A1	Casein kinase II subunit alpha	-1
M01	kaempferol	Q04206	RELA	Transcription factor p65	-1
M01	kaempferol	Q07812	BAX	Apoptosis regulator BAX	-1
M01	kaempferol	Q14994	NR1I3	Nuclear receptor subfamily 1 group I member 3	-1
M01	kaempferol	Q16539	MAPK14	Mitogen-activated protein kinase 14	-1
M01	kaempferol	Q16678	CYP1B1	Cytochrome P450 1B1	-1
M01	kaempferol	Q92731	ESR2	Estrogen receptor beta	1
M01	kaempferol	Q92819	HAS2	Hyaluronan synthase 2	-1
M02	quercetin	O14746	TERT	Telomerase reverse transcriptase	-1
M02	quercetin	O14757	CHEK1	Serine/threonine-protein kinase Chk1	-1
M02	quercetin	P00533	EGFR	Epidermal growth factor receptor	-1
M02	quercetin	P03372	ESR1	Estrogen receptor	-1
M02	quercetin	P07477	PRSS1	Trypsin-1	-1
M02	quercetin	P07900	HSP90AA1	Heat shock protein HSP 90-alpha	-1
M02	quercetin	P09917	ALOX5	Arachidonate 5-lipoxygenase	-1
M02	quercetin	P10275	AR	Androgen receptor	-1
M02	quercetin	P11309	PIM1	Proto-oncogene serine/threonine-protein kinase Pim-1	-1
M02	quercetin	P11511	CYP19A1	Cytochrome P450 19A1	-1
M02	quercetin	P15121	AKR1B1	Aldose reductase	-1
M02	quercetin	P18031	PTPN1	Tyrosine-protein phosphatase non-receptor type 1	-1
M02	quercetin	P18054	ALOX12	Arachidonate 12-lipoxygenase, 12S-type	-1
M02	quercetin	P19793	RXRA	Retinoic acid receptor RXR-alpha	1
M02	quercetin	P20248	CCNA2	Cyclin-A2	-1
M02	quercetin	P21397	MAOA	Amine oxidase [flavin-containing] A	-1
M02	quercetin	P21917	DRD4	D(4) dopamine receptor	1
M02	quercetin	P23219	PTGS1	Prostaglandin G/H synthase 1	-1
M02	quercetin	P24941	CDK2	Cell division protein kinase 2	-1
M02	quercetin	P35354	PTGS2	Prostaglandin G/H synthase 2	-1
M02	quercetin	P37058	HSD17B3	Estradiol 17-beta-dehydrogenase 3	-1
M02	quercetin	P37231	PPARG	Peroxisome proliferator-activated receptor gamma	1
M02	quercetin	P42336	PIK3CA	Phosphatidylinositol-4,5-bisphosphate 3-kinase catalytic subunit alpha isoform	-1
M02	quercetin	P48736	PIK3CG	Phosphatidylinositol-4,5-bisphosphate 3-kinase catalytic subunit gamma isoform	-1
M02	quercetin	P49841	GSK3B	Glycogen synthase kinase-3 beta	-1
M02	quercetin	P67870	CSNK2B	Casein kinase II subunit beta	-1
M02	quercetin	P68400	CSNK2A1	Casein kinase II subunit alpha	-1
M02	quercetin	Q14432	PDE3A	cGMP-inhibited 3',5'-cyclic phosphodiesterase A	-1
M02	quercetin	Q15596	NCOA2	Nuclear receptor coactivator 2	-1
M02	quercetin	Q16539	MAPK14	Mitogen-activated protein kinase 14	-1
M02	quercetin	Q92731	ESR2	Estrogen receptor beta	1
M03	rhodiosin	O14732	IMPA2	Inositol monophosphatase 2	-1
M03	rhodiosin	O14757	CHEK1	Serine/threonine-protein kinase Chk1	-1
M03	rhodiosin	O95749	GGPS1	Geranylgeranyl pyrophosphate synthetase	-1
M03	rhodiosin	P00918	CA2	Carbonic anhydrase 2	-1
M03	rhodiosin	P03372	ESR1	Estrogen receptor	-1
M03	rhodiosin	P07477	PRSS1	Trypsin-1	-1
M03	rhodiosin	P08709	F7	Coagulation factor VII	-1
M03	rhodiosin	P10275	AR	Androgen receptor	-1
M03	rhodiosin	P11309	PIM1	Proto-oncogene serine/threonine-protein kinase Pim-1	-1
M03	rhodiosin	P11388	TOP2A	DNA topoisomerase 2-alpha	-1
M03	rhodiosin	P18031	PTPN1	Tyrosine-protein phosphatase non-receptor type 1	-1
M03	rhodiosin	P18054	ALOX12	Arachidonate 12-lipoxygenase, 12S-type	-1
M03	rhodiosin	P20248	CCNA2	Cyclin-A2	-1
M03	rhodiosin	P23219	PTGS1	Prostaglandin G/H synthase 1	-1
M03	rhodiosin	P29218	IMPA1	Inositol monophosphatase	-1
M03	rhodiosin	P29474	NOS3	Nitric-oxide synthase, endothelial	-1
M03	rhodiosin	P35228	NOS2	Nitric oxide synthase, inducible	-1
M03	rhodiosin	P35354	PTGS2	Prostaglandin G/H synthase 2	-1
M03	rhodiosin	P37231	PPARG	Peroxisome proliferator-activated receptor gamma	1
M03	rhodiosin	Q14524	SCN5A	Sodium channel protein type 5 subunit alpha	-1
M03	rhodiosin	Q92731	ESR2	Estrogen receptor beta	1
M04	rutin	O14746	TERT	Telomerase reverse transcriptase	-1
M04	rutin	O14757	CHEK1	Serine/threonine-protein kinase Chk1	-1
M04	rutin	O95749	GGPS1	Geranylgeranyl pyrophosphate synthetase	-1
M04	rutin	P00533	EGFR	Epidermal growth factor receptor	-1
M04	rutin	P01308	INS	Insulin	-1
M04	rutin	P01375	TNF	Tumor necrosis factor	-1
M04	rutin	P01584	IL1B	Interleukin-1 beta	-1
M04	rutin	P01857	IGHG1	Ig gamma-1 chain C region	-1
M04	rutin	P03372	ESR1	Estrogen receptor	-1
M04	rutin	P04035	HMGCR	3-hydroxy-3-methylglutaryl-coenzyme A reductase	-1
M04	rutin	P04040	CAT	Catalase	-1
M04	rutin	P05107	ITGB2	Integrin beta-2	-1
M04	rutin	P05231	IL6	Interleukin-6	-1
M04	rutin	P06734	FCER2	Low affinity immunoglobulin epsilon Fc receptor	-1
M04	rutin	P07477	PRSS1	Trypsin-1	-1
M04	rutin	P07900	HSP90AA1	Heat shock protein HSP 90-alpha	-1
M04	rutin	P09211	GSTP1	Glutathione S-transferase P	-1
M04	rutin	P09917	ALOX5	Arachidonate 5-lipoxygenase	-1
M04	rutin	P10145	IL8	Interleukin-8	-1
M04	rutin	P11309	PIM1	Proto-oncogene serine/threonine-protein kinase Pim-1	-1
M04	rutin	P11511	CYP19A1	Cytochrome P450 19A1	-1
M04	rutin	P15121	AKR1B1	Aldose reductase	-1
M04	rutin	P16435	POR	NADPH--cytochrome P450 reductase	-1
M04	rutin	P18054	ALOX12	Arachidonate 12-lipoxygenase, 12S-type	-1
M04	rutin	P20248	CCNA2	Cyclin-A2	-1
M04	rutin	P21397	MAOA	Amine oxidase [flavin-containing] A	-1
M04	rutin	P21730	C5AR1	C5a anaphylatoxin chemotactic receptor 1	-1
M04	rutin	P21731	TBXA2R	Thromboxane A2 receptor	-1
M04	rutin	P21917	DRD4	D(4) dopamine receptor	1
M04	rutin	P23219	PTGS1	Prostaglandin G/H synthase 1	-1
M04	rutin	P24941	CDK2	Cell division protein kinase 2	-1
M04	rutin	P27487	DPP4	Dipeptidyl peptidase 4	-1
M04	rutin	P35228	NOS2	Nitric oxide synthase, inducible	-1
M04	rutin	P37058	HSD17B3	Estradiol 17-beta-dehydrogenase 3	-1
M04	rutin	P42336	PIK3CA	Phosphatidylinositol-4,5-bisphosphate 3-kinase catalytic subunit alpha isoform	-1
M04	rutin	P42574	CASP3	Caspase-3	-1
M04	rutin	P48736	PIK3CG	Phosphatidylinositol-4,5-bisphosphate 3-kinase catalytic subunit gamma isoform	-1
M04	rutin	P49841	GSK3B	Glycogen synthase kinase-3 beta	-1
M04	rutin	P49895	DIO1	Type I iodothyronine deiodinase	-1
M04	rutin	P67870	CSNK2B	Casein kinase II subunit beta	-1
M04	rutin	P68400	CSNK2A1	Casein kinase II subunit alpha	-1
M04	rutin	Q04206	RELA	Transcription factor p65	-1
M04	rutin	Q15596	NCOA2	Nuclear receptor coactivator 2	-1
M04	rutin	Q15788	NCOA1	Nuclear receptor coactivator 1	-1
M04	rutin	Q16539	MAPK14	Mitogen-activated protein kinase 14	-1
M04	rutin	Q92731	ESR2	Estrogen receptor beta	1
M04	rutin	Q92819	HAS2	Hyaluronan synthase 2	-1
M05	(24R)-4alpha-Methyl-24-ethylcholesta-7,25-dien-3beta-ylacetate	P03372	ESR1	Estrogen receptor	1
M06	7-O-Methylluteolin-6-C-beta-glucoside	P00918	CA2	Carbonic anhydrase 2	-1
M06	7-O-Methylluteolin-6-C-beta-glucoside	P03372	ESR1	Estrogen receptor	1
M06	7-O-Methylluteolin-6-C-beta-glucoside	P07900	HSP90AA1	Heat shock protein HSP 90-alpha	-1
M06	7-O-Methylluteolin-6-C-beta-glucoside	P09917	ALOX5	Arachidonate 5-lipoxygenase	-1
M06	7-O-Methylluteolin-6-C-beta-glucoside	P10275	AR	Androgen receptor	-1
M06	7-O-Methylluteolin-6-C-beta-glucoside	P11309	PIM1	Proto-oncogene serine/threonine-protein kinase Pim-1	-1
M06	7-O-Methylluteolin-6-C-beta-glucoside	P18031	PTPN1	Tyrosine-protein phosphatase non-receptor type 1	-1
M06	7-O-Methylluteolin-6-C-beta-glucoside	P23219	PTGS1	Prostaglandin G/H synthase 1	-1
M06	7-O-Methylluteolin-6-C-beta-glucoside	P24941	CDK2	Cell division protein kinase 2	-1
M06	7-O-Methylluteolin-6-C-beta-glucoside	P27338	MAOB	Amine oxidase [flavin-containing] B	-1
M06	7-O-Methylluteolin-6-C-beta-glucoside	P27487	DPP4	Dipeptidyl peptidase 4	-1
M06	7-O-Methylluteolin-6-C-beta-glucoside	P35228	NOS2	Nitric oxide synthase, inducible	-1
M06	7-O-Methylluteolin-6-C-beta-glucoside	P35354	PTGS2	Prostaglandin G/H synthase 2	-1
M06	7-O-Methylluteolin-6-C-beta-glucoside	P37231	PPARG	Peroxisome proliferator-activated receptor gamma	1
M06	7-O-Methylluteolin-6-C-beta-glucoside	P48736	PIK3CG	Phosphatidylinositol-4,5-bisphosphate 3-kinase catalytic subunit gamma isoform	-1
M06	7-O-Methylluteolin-6-C-beta-glucoside	P49841	GSK3B	Glycogen synthase kinase-3 beta	-1
M06	7-O-Methylluteolin-6-C-beta-glucoside	Q15596	NCOA2	Nuclear receptor coactivator 2	-1
M06	7-O-Methylluteolin-6-C-beta-glucoside	Q16539	MAPK14	Mitogen-activated protein kinase 14	-1
M06	7-O-Methylluteolin-6-C-beta-glucoside	Q92731	ESR2	Estrogen receptor beta	1
M07	Glycitein	O14732	IMPA2	Inositol monophosphatase 2	-1
M07	Glycitein	O14757	CHEK1	Serine/threonine-protein kinase Chk1	-1
M07	Glycitein	P00918	CA2	Carbonic anhydrase 2	-1
M07	Glycitein	P03372	ESR1	Estrogen receptor	1
M07	Glycitein	P05067	APP	Amyloid beta A4 protein	-1
M07	Glycitein	P07900	HSP90AA1	Heat shock protein HSP 90-alpha	-1
M07	Glycitein	P09917	ALOX5	Arachidonate 5-lipoxygenase	-1
M07	Glycitein	P10275	AR	Androgen receptor	-1
M07	Glycitein	P11309	PIM1	Proto-oncogene serine/threonine-protein kinase Pim-1	-1
M07	Glycitein	P14174	MIF	Macrophage migration inhibitory factor	-1
M07	Glycitein	P15559	NQO1	NAD(P)H dehydrogenase [quinone] 1	-1
M07	Glycitein	P17612	PRKACA	cAMP-dependent protein kinase catalytic subunit alpha	-1
M07	Glycitein	P18031	PTPN1	Tyrosine-protein phosphatase non-receptor type 1	-1
M07	Glycitein	P18054	ALOX12	Arachidonate 12-lipoxygenase, 12S-type	-1
M07	Glycitein	P20248	CCNA2	Cyclin-A2	-1
M07	Glycitein	P21397	MAOA	Amine oxidase [flavin-containing] A	-1
M07	Glycitein	P22894	MMP8	Neutrophil collagenase	-1
M07	Glycitein	P24941	CDK2	Cell division protein kinase 2	-1
M07	Glycitein	P27338	MAOB	Amine oxidase [flavin-containing] B	-1
M07	Glycitein	P29218	IMPA1	Inositol monophosphatase	-1
M07	Glycitein	P35228	NOS2	Nitric oxide synthase, inducible	-1
M07	Glycitein	P35354	PTGS2	Prostaglandin G/H synthase 2	-1
M07	Glycitein	P37231	PPARG	Peroxisome proliferator-activated receptor gamma	1
M07	Glycitein	P45452	MMP13	Collagenase 3	-1
M07	Glycitein	P48736	PIK3CG	Phosphatidylinositol-4,5-bisphosphate 3-kinase catalytic subunit gamma isoform	-1
M07	Glycitein	P49841	GSK3B	Glycogen synthase kinase-3 beta	-1
M07	Glycitein	P62158	CALM	Calmodulin	-1
M07	Glycitein	Q15596	NCOA2	Nuclear receptor coactivator 2	-1
M07	Glycitein	Q16539	MAPK14	Mitogen-activated protein kinase 14	-1
M07	Glycitein	Q92731	ESR2	Estrogen receptor beta	1
M07	Glycitein	Q9H4B7	TUBB1	Tubulin beta-1 chain	-1
M08	Physcion-8-O-beta-D-gentiobioside	P00918	CA2	Carbonic anhydrase 2	-1
M08	Physcion-8-O-beta-D-gentiobioside	P03372	ESR1	Estrogen receptor	-1
M08	Physcion-8-O-beta-D-gentiobioside	P07477	PRSS1	Trypsin-1	-1
M08	Physcion-8-O-beta-D-gentiobioside	P07900	HSP90AA1	Heat shock protein HSP 90-alpha	-1
M08	Physcion-8-O-beta-D-gentiobioside	P10275	AR	Androgen receptor	-1
M08	Physcion-8-O-beta-D-gentiobioside	P11309	PIM1	Proto-oncogene serine/threonine-protein kinase Pim-1	-1
M08	Physcion-8-O-beta-D-gentiobioside	P18031	PTPN1	Tyrosine-protein phosphatase non-receptor type 1	-1
M08	Physcion-8-O-beta-D-gentiobioside	P20248	CCNA2	Cyclin-A2	-1
M08	Physcion-8-O-beta-D-gentiobioside	P23219	PTGS1	Prostaglandin G/H synthase 1	-1
M08	Physcion-8-O-beta-D-gentiobioside	P24941	CDK2	Cell division protein kinase 2	-1
M08	Physcion-8-O-beta-D-gentiobioside	P27487	DPP4	Dipeptidyl peptidase 4	-1
M08	Physcion-8-O-beta-D-gentiobioside	P35228	NOS2	Nitric oxide synthase, inducible	-1
M08	Physcion-8-O-beta-D-gentiobioside	P35354	PTGS2	Prostaglandin G/H synthase 2	-1
M08	Physcion-8-O-beta-D-gentiobioside	P37231	PPARG	Peroxisome proliferator-activated receptor gamma	1
M08	Physcion-8-O-beta-D-gentiobioside	P48736	PIK3CG	Phosphatidylinositol-4,5-bisphosphate 3-kinase catalytic subunit gamma isoform	-1
M08	Physcion-8-O-beta-D-gentiobioside	P49841	GSK3B	Glycogen synthase kinase-3 beta	-1
M08	Physcion-8-O-beta-D-gentiobioside	Q07820	MCL1	Induced myeloid leukemia cell differentiation protein Mcl-1	-1
M08	Physcion-8-O-beta-D-gentiobioside	Q16539	MAPK14	Mitogen-activated protein kinase 14	-1
M08	Physcion-8-O-beta-D-gentiobioside	Q92731	ESR2	Estrogen receptor beta	1
M09	mutatoxanthin	P13631	RARG	Retinoic acid receptor gamma-1	1
M02	quercetin	O14493	CLDN4	Claudin-4	-1
M02	quercetin	O14625	CXCL11	C-X-C motif chemokine 11	-1
M02	quercetin	O15111	CHUK	Inhibitor of nuclear factor kappa-B kinase subunit alpha	-1
M02	quercetin	O15392	BIRC5	Baculoviral IAP repeat-containing protein 5	-1
M02	quercetin	O43451	MGAM	Maltase-glucoamylase, intestinal	-1
M02	quercetin	O75469	NR1I2	Nuclear receptor subfamily 1 group I member 2	1
M02	quercetin	O96017	CHEK2	Serine/threonine-protein kinase Chk2	-1
M02	quercetin	P00533	EGFR	Epidermal growth factor receptor	-1
M02	quercetin	P00749	PLAU	Urokinase-type plasminogen activator	-1
M02	quercetin	P00750	PLAT	Tissue-type plasminogen activator	-1
M02	quercetin	P01100	FOS	Proto-oncogene protein c-fos	-1
M02	quercetin	P01106	MYC	Myc proto-oncogene protein	-1
M02	quercetin	P01133	EGF	Pro-epidermal growth factor	-1
M02	quercetin	P01137	TGFB1	Transforming growth factor beta-1	-1
M02	quercetin	P01344	IGF2	Insulin-like growth factor II	-1
M02	quercetin	P01375	TNF	Tumor necrosis factor	-1
M02	quercetin	P01579	IFNG	Interferon gamma	-1
M02	quercetin	P01583	IL1A	Interleukin-1 alpha	-1
M02	quercetin	P01584	IL1B	Interleukin-1 beta	-1
M02	quercetin	P02452	COL1A1	Collagen alpha-1(I) chain	-1
M02	quercetin	P02461	COL3A1	Collagen alpha-1(III) chain	-1
M02	quercetin	P02741	CRP	C-reactive protein	-1
M02	quercetin	P02778	CXCL10	Small inducible cytokine B10	-1
M02	quercetin	P03372	ESR1	Estrogen receptor	-1
M02	quercetin	P03956	MMP1	Interstitial collagenase	-1
M02	quercetin	P04040	CAT	Catalase	-1
M02	quercetin	P04049	RAF1	RAF proto-oncogene serine/threonine-protein kinase	-1
M02	quercetin	P04626	ERBB2	Receptor tyrosine-protein kinase erbB-2	-1
M02	quercetin	P04637	TP53	Cellular tumor antigen p53	-1
M02	quercetin	P04792	HSPB1	Heat shock protein beta-1	-1
M02	quercetin	P04798	CYP1A1	Cytochrome P450 1A1	-1
M02	quercetin	P05121	SERPINE1	Plasminogen activator inhibitor 1	-1
M02	quercetin	P05164	MPO	Myeloperoxidase	-1
M02	quercetin	P05177	CYP1A2	Cytochrome P450 1A2	-1
M02	quercetin	P05231	IL6	Interleukin-6	-1
M02	quercetin	P05362	ICAM1	Intercellular adhesion molecule 1	-1
M02	quercetin	P05412	JUN	Transcription factor AP-1	-1
M02	quercetin	P06213	INSR	Insulin receptor	-1
M02	quercetin	P06400	RB1	Retinoblastoma-associated protein	-1
M02	quercetin	P06493	CDK1	Cell division control protein 2 homolog	-1
M02	quercetin	P07204	THBD	Thrombomodulin	-1
M02	quercetin	P07339	CTSD	Cathepsin D	-1
M02	quercetin	P08253	MMP2	72 kDa type IV collagenase	-1
M02	quercetin	P08294	SOD3	Extracellular superoxide dismutase [Cu-Zn]	-1
M02	quercetin	P08684	CYP3A4	Cytochrome P450 3A4	-1
M02	quercetin	P09211	GSTP1	Glutathione S-transferase P	-1
M02	quercetin	P09488	GSTM1	Glutathione S-transferase Mu 1	-1
M02	quercetin	P09601	HMOX1	Heme oxygenase 1	-1
M02	quercetin	P09917	ALOX5	Arachidonate 5-lipoxygenase	-1
M02	quercetin	P10145	IL8	Interleukin-8	-1
M02	quercetin	P10275	AR	Androgen receptor	-1
M02	quercetin	P10415	BCL2	Apoptosis regulator Bcl-2	-1
M02	quercetin	P10914	IRF1	Interferon regulatory factor 1	-1
M02	quercetin	P11021	HSPA5	78 kDa glucose-regulated protein	-1
M02	quercetin	P11309	PIM1	Proto-oncogene serine/threonine-protein kinase Pim-1	-1
M02	quercetin	P11387	TOP1	DNA topoisomerase 1	-1
M02	quercetin	P11388	TOP2A	DNA topoisomerase 2-alpha	-1
M02	quercetin	P11926	ODC1	Ornithine decarboxylase	-1
M02	quercetin	P12643	BMP2	Bone morphogenetic protein 2	-1
M02	quercetin	P13500	CCL2	Small inducible cytokine A2	-1
M02	quercetin	P13726	F3	Tissue factor	-1
M02	quercetin	P14598	NCF1	Neutrophil cytosol factor 1	-1
M02	quercetin	P14635	CCNB1	G2/mitotic-specific cyclin-B1	-1
M02	quercetin	P14672	SLC2A4	Solute carrier family 2, facilitated glucose transporter member 4	-1
M02	quercetin	P14780	MMP9	Matrix metalloproteinase-9	-1
M02	quercetin	P15309	ACPP	Prostatic acid phosphatase	-1
M02	quercetin	P15559	NQO1	NAD(P)H dehydrogenase [quinone] 1	-1
M02	quercetin	P15692	VEGFA	Vascular endothelial growth factor A	-1
M02	quercetin	P16435	POR	NADPH--cytochrome P450 reductase	-1
M02	quercetin	P16581	SELE	E-selectin	-1
M02	quercetin	P17252	PRKCA	Protein kinase C alpha type	-1
M02	quercetin	P17936	IGFBP3	Insulin-like growth factor-binding protein 3	-1
M02	quercetin	P19320	VCAM1	Vascular cell adhesion protein 1	-1
M02	quercetin	P19419	ELK1	ETS domain-containing protein Elk-1	-1
M02	quercetin	P19875	CXCL2	C-X-C motif chemokine 2	-1
M02	quercetin	P21860	ERBB3	Receptor tyrosine-protein kinase erbB-3	-1
M02	quercetin	P22301	IL10	Interleukin-10	-1
M02	quercetin	P23219	PTGS1	Prostaglandin G/H synthase 1	-1
M02	quercetin	P24385	CCND1	G1/S-specific cyclin-D1	-1
M02	quercetin	P25963	NFKBIA	NF-kappa-B inhibitor alpha	-1
M02	quercetin	P27169	PON1	Serum paraoxonase/arylesterase 1	-1
M02	quercetin	P27487	DPP4	Dipeptidyl peptidase 4	-1
M02	quercetin	P28161	GSTM2	Glutathione S-transferase Mu 2	-1
M02	quercetin	P28482	MAPK1	Mitogen-activated protein kinase 1	1
M02	quercetin	P29474	NOS3	Nitric-oxide synthase, endothelial	-1
M02	quercetin	P29965	CD40LG	CD40 ligand	-1
M02	quercetin	P35228	NOS2	Nitric oxide synthase, inducible	-1
M02	quercetin	P35354	PTGS2	Prostaglandin G/H synthase 2	-1
M02	quercetin	P35869	AHR	Aryl hydrocarbon receptor	1
M02	quercetin	P37231	PPARG	Peroxisome proliferator-activated receptor gamma	1
M02	quercetin	P38936	CDKN1A	Cyclin-dependent kinase inhibitor 1	-1
M02	quercetin	P42224	STAT1	Signal transducer and activator of transcription 1-alpha/beta	-1
M02	quercetin	P42574	CASP3	Caspase-3	-1
M02	quercetin	P42771	CDKN2A	Cyclin-dependent kinase inhibitor 2A, isoforms 1/2/3	-1
M02	quercetin	P43115	PTGER3	Prostaglandin E2 receptor, EP3 subtype	1
M02	quercetin	P47989	XDH	Xanthine dehydrogenase/oxidase	-1
M02	quercetin	P49841	GSK3B	Glycogen synthase kinase-3 beta	-1
M02	quercetin	P49888	SULT1E1	Estrogen sulfotransferase	-1
M02	quercetin	P49895	DIO1	Type I iodothyronine deiodinase	-1
M02	quercetin	P52789	HK2	Hexokinase-2	-1
M02	quercetin	P55211	CASP9	Caspase-9	-1
M02	quercetin	P56537	EIF6	Eukaryotic translation initiation factor 6	-1
M02	quercetin	P60484	PTEN	Phosphatidylinositol 3,4,5-trisphosphate 3-phosphatase and dual-specificity protein phosphatase PTEN	-1
M02	quercetin	P60568	IL2	Interleukin-2	-1
M02	quercetin	Q00613	HSF1	Heat shock factor protein 1	-1
M02	quercetin	Q01094	E2F1	Transcription factor E2F1	-1
M02	quercetin	Q03135	CAV1	Caveolin-1	-1
M02	quercetin	Q03181	PPARD	Peroxisome proliferator-activated receptor delta	-1
M02	quercetin	Q04206	RELA	Transcription factor p65	-1
M02	quercetin	Q06455	RUNX1T1	Protein CBFA2T1	-1
M02	quercetin	Q07812	BAX	Apoptosis regulator BAX	-1
M02	quercetin	Q07817	BCL2L1	Apoptosis regulator Bcl-X	-1
M02	quercetin	Q07869	PPARA	Peroxisome proliferator-activated receptor alpha	1
M02	quercetin	Q13950	RUNX2	Runt-related transcription factor 2	-1
M02	quercetin	Q14209	E2F2	Transcription factor E2F2	-1
M02	quercetin	Q14790	CASP8	Caspase-8	-1
M02	quercetin	Q14994	NR1I3	Nuclear receptor subfamily 1 group I member 3	-1
M02	quercetin	Q15113	PCOLCE	Procollagen C-endopeptidase enhancer 1	-1
M02	quercetin	Q16236	NFE2L2	Nuclear factor erythroid 2-related factor 2	-1
M02	quercetin	Q16665	HIF1A	Hypoxia-inducible factor 1 alpha	-1
M02	quercetin	Q16678	CYP1B1	Cytochrome P450 1B1	-1
M02	quercetin	Q92731	ESR2	Estrogen receptor beta	1
M02	quercetin	Q92819	HAS2	Hyaluronan synthase 2	-1
M02	quercetin	Q96JK2	DCAF5	DDB1- and CUL4-associated factor 5	-1
M02	quercetin	Q99801	NKX3-1	Homeobox protein Nkx-3.1	-1
M02	quercetin	Q9NRD8	DUOX2	Dual oxidase 2	-1
M02	quercetin	Q9NS23	RASSF1	Ras association domain-containing protein 1	-1
M02	quercetin	Q9UII4	HERC5	E3 ISG15--protein ligase HERC5	-1
M02	quercetin	Q9UNQ0	ABCG2	ATP-binding cassette sub-family G member 2	-1
M10	astragalin	O14732	IMPA2	Inositol monophosphatase 2	-1
M10	astragalin	O14757	CHEK1	Serine/threonine-protein kinase Chk1	-1
M10	astragalin	P00918	CA2	Carbonic anhydrase 2	-1
M10	astragalin	P03372	ESR1	Estrogen receptor	-1
M10	astragalin	P07900	HSP90AA1	Heat shock protein HSP 90-alpha	-1
M10	astragalin	P09917	ALOX5	Arachidonate 5-lipoxygenase	-1
M10	astragalin	P10275	AR	Androgen receptor	-1
M10	astragalin	P11309	PIM1	Proto-oncogene serine/threonine-protein kinase Pim-1	-1
M10	astragalin	P11511	CYP19A1	Cytochrome P450 19A1	-1
M10	astragalin	P14174	MIF	Macrophage migration inhibitory factor	-1
M10	astragalin	P18031	PTPN1	Tyrosine-protein phosphatase non-receptor type 1	-1
M10	astragalin	P18054	ALOX12	Arachidonate 12-lipoxygenase, 12S-type	-1
M10	astragalin	P20248	CCNA2	Cyclin-A2	-1
M10	astragalin	P21397	MAOA	Amine oxidase [flavin-containing] A	-1
M10	astragalin	P23219	PTGS1	Prostaglandin G/H synthase 1	-1
M10	astragalin	P24941	CDK2	Cell division protein kinase 2	-1
M10	astragalin	P27338	MAOB	Amine oxidase [flavin-containing] B	-1
M10	astragalin	P29218	IMPA1	Inositol monophosphatase	-1
M10	astragalin	P35228	NOS2	Nitric oxide synthase, inducible	-1
M10	astragalin	P35354	PTGS2	Prostaglandin G/H synthase 2	-1
M10	astragalin	P37058	HSD17B3	Estradiol 17-beta-dehydrogenase 3	-1
M10	astragalin	P37231	PPARG	Peroxisome proliferator-activated receptor gamma	1
M10	astragalin	P42336	PIK3CA	Phosphatidylinositol-4,5-bisphosphate 3-kinase catalytic subunit alpha isoform	-1
M10	astragalin	P48736	PIK3CG	Phosphatidylinositol-4,5-bisphosphate 3-kinase catalytic subunit gamma isoform	-1
M10	astragalin	P49841	GSK3B	Glycogen synthase kinase-3 beta	-1
M10	astragalin	P67870	CSNK2B	Casein kinase II subunit beta	-1
M10	astragalin	P68400	CSNK2A1	Casein kinase II subunit alpha	-1
M10	astragalin	Q04760	GLO1	Lactoylglutathione lyase	-1
M10	astragalin	Q15596	NCOA2	Nuclear receptor coactivator 2	-1
M10	astragalin	Q16539	MAPK14	Mitogen-activated protein kinase 14	-1
M10	astragalin	Q92731	ESR2	Estrogen receptor beta	1
M11	cholesteryl benzoate	P10275	AR	Androgen receptor	1
M11	cholesteryl benzoate	P17612	PRKACA	cAMP-dependent protein kinase catalytic subunit alpha	-1
M11	cholesteryl benzoate	P18405	SRD5A1	3-oxo-5-alpha-steroid 4-dehydrogenase 1	-1
M11	cholesteryl benzoate	P30304	CDC25A	M-phase inducer phosphatase 1	1
M11	cholesteryl benzoate	P31213	SRD5A2	3-oxo-5-alpha-steroid 4-dehydrogenase 2	-1
M12	isorhamnetin-3-O-β-rutinoside	P00734	F2	Prothrombin	-1
M12	isorhamnetin-3-O-β-rutinoside	P00918	CA2	Carbonic anhydrase 2	-1
M12	isorhamnetin-3-O-β-rutinoside	P03372	ESR1	Estrogen receptor	-1
M12	isorhamnetin-3-O-β-rutinoside	P07900	HSP90AA1	Heat shock protein HSP 90-alpha	-1
M12	isorhamnetin-3-O-β-rutinoside	P09917	ALOX5	Arachidonate 5-lipoxygenase	-1
M12	isorhamnetin-3-O-β-rutinoside	P10275	AR	Androgen receptor	-1
M12	isorhamnetin-3-O-β-rutinoside	P11309	PIM1	Proto-oncogene serine/threonine-protein kinase Pim-1	-1
M12	isorhamnetin-3-O-β-rutinoside	P11511	CYP19A1	Cytochrome P450 19A1	-1
M12	isorhamnetin-3-O-β-rutinoside	P14174	MIF	Macrophage migration inhibitory factor	-1
M12	isorhamnetin-3-O-β-rutinoside	P15559	NQO1	NAD(P)H dehydrogenase [quinone] 1	-1
M12	isorhamnetin-3-O-β-rutinoside	P18031	PTPN1	Tyrosine-protein phosphatase non-receptor type 1	-1
M12	isorhamnetin-3-O-β-rutinoside	P18054	ALOX12	Arachidonate 12-lipoxygenase, 12S-type	-1
M12	isorhamnetin-3-O-β-rutinoside	P21397	MAOA	Amine oxidase [flavin-containing] A	-1
M12	isorhamnetin-3-O-β-rutinoside	P23219	PTGS1	Prostaglandin G/H synthase 1	-1
M12	isorhamnetin-3-O-β-rutinoside	P24941	CDK2	Cell division protein kinase 2	-1
M12	isorhamnetin-3-O-β-rutinoside	P27487	DPP4	Dipeptidyl peptidase 4	-1
M12	isorhamnetin-3-O-β-rutinoside	P35228	NOS2	Nitric oxide synthase, inducible	-1
M12	isorhamnetin-3-O-β-rutinoside	P35354	PTGS2	Prostaglandin G/H synthase 2	-1
M12	isorhamnetin-3-O-β-rutinoside	P37058	HSD17B3	Estradiol 17-beta-dehydrogenase 3	-1
M12	isorhamnetin-3-O-β-rutinoside	P37231	PPARG	Peroxisome proliferator-activated receptor gamma	1
M12	isorhamnetin-3-O-β-rutinoside	P42336	PIK3CA	Phosphatidylinositol-4,5-bisphosphate 3-kinase catalytic subunit alpha isoform	-1
M12	isorhamnetin-3-O-β-rutinoside	P48736	PIK3CG	Phosphatidylinositol-4,5-bisphosphate 3-kinase catalytic subunit gamma isoform	-1
M12	isorhamnetin-3-O-β-rutinoside	P49841	GSK3B	Glycogen synthase kinase-3 beta	-1
M12	isorhamnetin-3-O-β-rutinoside	P62158	CALM	Calmodulin	-1
M12	isorhamnetin-3-O-β-rutinoside	P67870	CSNK2B	Casein kinase II subunit beta	-1
M12	isorhamnetin-3-O-β-rutinoside	P68400	CSNK2A1	Casein kinase II subunit alpha	-1
M12	isorhamnetin-3-O-β-rutinoside	Q04760	GLO1	Lactoylglutathione lyase	-1
M12	isorhamnetin-3-O-β-rutinoside	Q14524	SCN5A	Sodium channel protein type 5 subunit alpha	-1
M12	isorhamnetin-3-O-β-rutinoside	Q16539	MAPK14	Mitogen-activated protein kinase 14	-1
M12	isorhamnetin-3-O-β-rutinoside	Q92731	ESR2	Estrogen receptor beta	1
M13	kaempferol-3-glucoside	O14732	IMPA2	Inositol monophosphatase 2	-1
M13	kaempferol-3-glucoside	O14757	CHEK1	Serine/threonine-protein kinase Chk1	-1
M13	kaempferol-3-glucoside	P00918	CA2	Carbonic anhydrase 2	-1
M13	kaempferol-3-glucoside	P03372	ESR1	Estrogen receptor	-1
M13	kaempferol-3-glucoside	P07477	PRSS1	Trypsin-1	-1
M13	kaempferol-3-glucoside	P07900	HSP90AA1	Heat shock protein HSP 90-alpha	-1
M13	kaempferol-3-glucoside	P09917	ALOX5	Arachidonate 5-lipoxygenase	-1
M13	kaempferol-3-glucoside	P10275	AR	Androgen receptor	-1
M13	kaempferol-3-glucoside	P11309	PIM1	Proto-oncogene serine/threonine-protein kinase Pim-1	-1
M13	kaempferol-3-glucoside	P11511	CYP19A1	Cytochrome P450 19A1	-1
M13	kaempferol-3-glucoside	P14174	MIF	Macrophage migration inhibitory factor	-1
M13	kaempferol-3-glucoside	P17612	PRKACA	cAMP-dependent protein kinase catalytic subunit alpha	-1
M13	kaempferol-3-glucoside	P18031	PTPN1	Tyrosine-protein phosphatase non-receptor type 1	-1
M13	kaempferol-3-glucoside	P18054	ALOX12	Arachidonate 12-lipoxygenase, 12S-type	-1
M13	kaempferol-3-glucoside	P20248	CCNA2	Cyclin-A2	-1
M13	kaempferol-3-glucoside	P21397	MAOA	Amine oxidase [flavin-containing] A	-1
M13	kaempferol-3-glucoside	P23219	PTGS1	Prostaglandin G/H synthase 1	-1
M13	kaempferol-3-glucoside	P24941	CDK2	Cell division protein kinase 2	-1
M13	kaempferol-3-glucoside	P27338	MAOB	Amine oxidase [flavin-containing] B	-1
M13	kaempferol-3-glucoside	P29218	IMPA1	Inositol monophosphatase	-1
M13	kaempferol-3-glucoside	P35228	NOS2	Nitric oxide synthase, inducible	-1
M13	kaempferol-3-glucoside	P35354	PTGS2	Prostaglandin G/H synthase 2	-1
M13	kaempferol-3-glucoside	P37058	HSD17B3	Estradiol 17-beta-dehydrogenase 3	-1
M13	kaempferol-3-glucoside	P37231	PPARG	Peroxisome proliferator-activated receptor gamma	1
M13	kaempferol-3-glucoside	P42336	PIK3CA	Phosphatidylinositol-4,5-bisphosphate 3-kinase catalytic subunit alpha isoform	-1
M13	kaempferol-3-glucoside	P48736	PIK3CG	Phosphatidylinositol-4,5-bisphosphate 3-kinase catalytic subunit gamma isoform	-1
M13	kaempferol-3-glucoside	P49841	GSK3B	Glycogen synthase kinase-3 beta	-1
M13	kaempferol-3-glucoside	P67870	CSNK2B	Casein kinase II subunit beta	-1
M13	kaempferol-3-glucoside	P68400	CSNK2A1	Casein kinase II subunit alpha	-1
M13	kaempferol-3-glucoside	Q04760	GLO1	Lactoylglutathione lyase	-1
M13	kaempferol-3-glucoside	Q15596	NCOA2	Nuclear receptor coactivator 2	-1
M13	kaempferol-3-glucoside	Q15788	NCOA1	Nuclear receptor coactivator 1	-1
M13	kaempferol-3-glucoside	Q16539	MAPK14	Mitogen-activated protein kinase 14	-1
M13	kaempferol-3-glucoside	Q92731	ESR2	Estrogen receptor beta	1
M14	phosphatide	P00918	CA2	Carbonic anhydrase 2	-1
M14	phosphatide	P02766	TTR	Transthyretin	-1
M14	phosphatide	P03372	ESR1	Estrogen receptor	1
M14	phosphatide	P06746	POLB	DNA polymerase beta	-1
M14	phosphatide	P08575	PTPRC	Receptor-type tyrosine-protein phosphatase C	-1
M14	phosphatide	P10275	AR	Androgen receptor	-1
M14	phosphatide	P11309	PIM1	Proto-oncogene serine/threonine-protein kinase Pim-1	-1
M14	phosphatide	P14902	IDO1	Indoleamine 2,3-dioxygenase 1	-1
M14	phosphatide	P18031	PTPN1	Tyrosine-protein phosphatase non-receptor type 1	-1
M14	phosphatide	P20248	CCNA2	Cyclin-A2	-1
M14	phosphatide	P23219	PTGS1	Prostaglandin G/H synthase 1	-1
M14	phosphatide	P35228	NOS2	Nitric oxide synthase, inducible	-1
M14	phosphatide	P35354	PTGS2	Prostaglandin G/H synthase 2	-1
M14	phosphatide	P37231	PPARG	Peroxisome proliferator-activated receptor gamma	1
M14	phosphatide	P48736	PIK3CG	Phosphatidylinositol-4,5-bisphosphate 3-kinase catalytic subunit gamma isoform	-1
M14	phosphatide	P49841	GSK3B	Glycogen synthase kinase-3 beta	-1
M14	phosphatide	Q06124	PTPN11	Tyrosine-protein phosphatase non-receptor type 11	-1
M14	phosphatide	Q15596	NCOA2	Nuclear receptor coactivator 2	-1
M14	phosphatide	Q16539	MAPK14	Mitogen-activated protein kinase 14	-1
M14	phosphatide	Q92731	ESR2	Estrogen receptor beta	1
M15	vitamin K	P07900	HSP90AA1	Heat shock protein HSP 90-alpha	-1
M15	vitamin K	P08253	MMP2	72 kDa type IV collagenase	-1
M15	vitamin K	P08575	PTPRC	Receptor-type tyrosine-protein phosphatase C	-1
M15	vitamin K	P16581	SELE	E-selectin	-1
M15	vitamin K	P16671	CD36	Platelet glycoprotein 4	-1
M15	vitamin K	P19320	VCAM1	Vascular cell adhesion protein 1	-1
M15	vitamin K	P27695	APEX1	DNA-(apurinic or apyrimidinic site) lyase	-1
M15	vitamin K	P78380	OLR1	Oxidized low-density lipoprotein receptor 1	-1
M16	vitamin P	P03372	ESR1	Estrogen receptor	-1
M16	vitamin P	P03886	ND1	NADH-ubiquinone oxidoreductase chain 1	-1
M16	vitamin P	P03891	ND2	NADH-ubiquinone oxidoreductase chain 2	-1
M16	vitamin P	P03897	ND3	NADH-ubiquinone oxidoreductase chain 3	-1
M16	vitamin P	P03901	ND4L	NADH-ubiquinone oxidoreductase chain 4L	-1
M16	vitamin P	P03905	ND4	NADH-ubiquinone oxidoreductase chain 4	-1
M16	vitamin P	P03915	ND5	NADH-ubiquinone oxidoreductase chain 5	-1
M16	vitamin P	P03923	ND6	NADH-ubiquinone oxidoreductase chain 6	-1
M16	vitamin P	P05362	ICAM1	Intercellular adhesion molecule 1	-1
M16	vitamin P	P07900	HSP90AA1	Heat shock protein HSP 90-alpha	-1
M16	vitamin P	P10275	AR	Androgen receptor	-1
M16	vitamin P	P11309	PIM1	Proto-oncogene serine/threonine-protein kinase Pim-1	-1
M16	vitamin P	P18031	PTPN1	Tyrosine-protein phosphatase non-receptor type 1	-1
M16	vitamin P	P19320	VCAM1	Vascular cell adhesion protein 1	-1
M16	vitamin P	P20248	CCNA2	Cyclin-A2	-1
M16	vitamin P	P21397	MAOA	Amine oxidase [flavin-containing] A	-1
M16	vitamin P	P23219	PTGS1	Prostaglandin G/H synthase 1	-1
M16	vitamin P	P24941	CDK2	Cell division protein kinase 2	-1
M16	vitamin P	P27338	MAOB	Amine oxidase [flavin-containing] B	-1
M16	vitamin P	P35228	NOS2	Nitric oxide synthase, inducible	-1
M16	vitamin P	P35354	PTGS2	Prostaglandin G/H synthase 2	-1
M16	vitamin P	P37231	PPARG	Peroxisome proliferator-activated receptor gamma	1
M16	vitamin P	P42574	CASP3	Caspase-3	-1
M16	vitamin P	P48736	PIK3CG	Phosphatidylinositol-4,5-bisphosphate 3-kinase catalytic subunit gamma isoform	-1
M16	vitamin P	Q07812	BAX	Apoptosis regulator BAX	-1
M16	vitamin P	Q08493	PDE4C	cAMP-specific 3',5'-cyclic phosphodiesterase 4C	-1
M16	vitamin P	Q08499	PDE4D	cAMP-specific 3',5'-cyclic phosphodiesterase 4D	-1
M16	vitamin P	Q15596	NCOA2	Nuclear receptor coactivator 2	-1
M16	vitamin P	Q16539	MAPK14	Mitogen-activated protein kinase 14	-1
M16	vitamin P	Q8IVF5	TIAM2	T-lymphoma invasion and metastasis-inducing protein 2	-1
M16	vitamin P	Q92731	ESR2	Estrogen receptor beta	1
M16	vitamin P	Q9H4B7	TUBB1	Tubulin beta-1 chain	-1
M17	Qercetin-3-O-galactoside	O14746	TERT	Telomerase reverse transcriptase	-1
M17	Qercetin-3-O-galactoside	P00441	SOD1	Superoxide dismutase [Cu-Zn]	-1
M17	Qercetin-3-O-galactoside	P00533	EGFR	Epidermal growth factor receptor	-1
M17	Qercetin-3-O-galactoside	P00918	CA2	Carbonic anhydrase 2	-1
M17	Qercetin-3-O-galactoside	P03372	ESR1	Estrogen receptor	1
M17	Qercetin-3-O-galactoside	P04040	CAT	Catalase	-1
M17	Qercetin-3-O-galactoside	P07900	HSP90AA1	Heat shock protein HSP 90-alpha	-1
M17	Qercetin-3-O-galactoside	P09917	ALOX5	Arachidonate 5-lipoxygenase	-1
M17	Qercetin-3-O-galactoside	P10275	AR	Androgen receptor	-1
M17	Qercetin-3-O-galactoside	P11309	PIM1	Proto-oncogene serine/threonine-protein kinase Pim-1	-1
M17	Qercetin-3-O-galactoside	P11511	CYP19A1	Cytochrome P450 19A1	-1
M17	Qercetin-3-O-galactoside	P14174	MIF	Macrophage migration inhibitory factor	-1
M17	Qercetin-3-O-galactoside	P15121	AKR1B1	Aldose reductase	-1
M17	Qercetin-3-O-galactoside	P18031	PTPN1	Tyrosine-protein phosphatase non-receptor type 1	-1
M17	Qercetin-3-O-galactoside	P18054	ALOX12	Arachidonate 12-lipoxygenase, 12S-type	-1
M17	Qercetin-3-O-galactoside	P20248	CCNA2	Cyclin-A2	-1
M17	Qercetin-3-O-galactoside	P21397	MAOA	Amine oxidase [flavin-containing] A	-1
M17	Qercetin-3-O-galactoside	P21917	DRD4	D(4) dopamine receptor	1
M17	Qercetin-3-O-galactoside	P23219	PTGS1	Prostaglandin G/H synthase 1	-1
M17	Qercetin-3-O-galactoside	P24941	CDK2	Cell division protein kinase 2	-1
M17	Qercetin-3-O-galactoside	P27487	DPP4	Dipeptidyl peptidase 4	-1
M17	Qercetin-3-O-galactoside	P35354	PTGS2	Prostaglandin G/H synthase 2	-1
M17	Qercetin-3-O-galactoside	P37058	HSD17B3	Estradiol 17-beta-dehydrogenase 3	-1
M17	Qercetin-3-O-galactoside	P37231	PPARG	Peroxisome proliferator-activated receptor gamma	1
M17	Qercetin-3-O-galactoside	P42336	PIK3CA	Phosphatidylinositol-4,5-bisphosphate 3-kinase catalytic subunit alpha isoform	-1
M17	Qercetin-3-O-galactoside	P42574	CASP3	Caspase-3	-1
M17	Qercetin-3-O-galactoside	P48736	PIK3CG	Phosphatidylinositol-4,5-bisphosphate 3-kinase catalytic subunit gamma isoform	-1
M17	Qercetin-3-O-galactoside	P49841	GSK3B	Glycogen synthase kinase-3 beta	-1
M17	Qercetin-3-O-galactoside	P67870	CSNK2B	Casein kinase II subunit beta	-1
M17	Qercetin-3-O-galactoside	P68400	CSNK2A1	Casein kinase II subunit alpha	-1
M17	Qercetin-3-O-galactoside	Q04760	GLO1	Lactoylglutathione lyase	-1
M17	Qercetin-3-O-galactoside	Q07812	BAX	Apoptosis regulator BAX	-1
M17	Qercetin-3-O-galactoside	Q15596	NCOA2	Nuclear receptor coactivator 2	-1
M17	Qercetin-3-O-galactoside	Q16539	MAPK14	Mitogen-activated protein kinase 14	-1
M17	Qercetin-3-O-galactoside	Q92731	ESR2	Estrogen receptor beta	1
M17	Qercetin-3-O-galactoside	Q96EB6	SIRT1	NAD-dependent protein deacetylase sirtuin-1	-1
M18	(-)-epicatechin	P03372	ESR1	Estrogen receptor	1
M18	(-)-epicatechin	P11309	PIM1	Proto-oncogene serine/threonine-protein kinase Pim-1	-1
M18	(-)-epicatechin	P11388	TOP2A	DNA topoisomerase 2-alpha	-1
M18	(-)-epicatechin	P18054	ALOX12	Arachidonate 12-lipoxygenase, 12S-type	-1
M18	(-)-epicatechin	P43166	CA7	Carbonic anhydrase 7	-1
M18	(-)-epicatechin	Q92731	ESR2	Estrogen receptor beta	1
M01	kaempferol	O43242	PSMD3	26S proteasome non-ATPase regulatory subunit 3	-1
M01	kaempferol	O95433	AHSA1	Activator of 90 kDa heat shock protein ATPase homolog 1	-1
M01	kaempferol	P00918	CA2	Carbonic anhydrase 2	-1
M01	kaempferol	P14174	MIF	Macrophage migration inhibitory factor	-1
M01	kaempferol	P29218	IMPA1	Inositol monophosphatase	-1
M01	kaempferol	P31749	AKT1	RAC-alpha serine/threonine-protein kinase	-1
M01	kaempferol	P62158	CALM	Calmodulin	-1
M01	kaempferol	Q04760	GLO1	Lactoylglutathione lyase	-1
M01	kaempferol	Q08209	PPP3CA	Serine/threonine-protein phosphatase 2B catalytic subunit alpha isoform	-1
M02	quercetin	P00918	CA2	Carbonic anhydrase 2	-1
M02	quercetin	P14174	MIF	Macrophage migration inhibitory factor	-1
M02	quercetin	P62158	CALM	Calmodulin	-1
M02	quercetin	Q04760	GLO1	Lactoylglutathione lyase	1
M04	rutin	P00441	SOD1	Superoxide dismutase [Cu-Zn]	-1
M04	rutin	P05771	PRKCB	Protein kinase C beta type	-1
M04	rutin	P14174	MIF	Macrophage migration inhibitory factor	-1
M04	rutin	P61925	PKIA	cAMP-dependent protein kinase inhibitor alpha	-1
M04	rutin	Q04760	GLO1	Lactoylglutathione lyase	-1
M02	quercetin	O43242	PSMD3	26S proteasome non-ATPase regulatory subunit 3	-1
M02	quercetin	O95433	AHSA1	Activator of 90 kDa heat shock protein ATPase homolog 1	-1
M02	quercetin	P00441	SOD1	Superoxide dismutase [Cu-Zn]	-1
M02	quercetin	P05771	PRKCB	Protein kinase C beta type	-1
M02	quercetin	P09874	PARP1	Poly [ADP-ribose] polymerase 1	-1
M02	quercetin	P10451	SPP1	Osteopontin	-1
M02	quercetin	P17302	GJA1	Gap junction alpha-1 protein	-1
M02	quercetin	P17612	PRKACA	cAMP-dependent protein kinase catalytic subunit alpha	-1
M02	quercetin	P20936	RASA1	Ras GTPase-activating protein 1	-1
M02	quercetin	P31749	AKT1	RAC-alpha serine/threonine-protein kinase	-1
M02	quercetin	P55786	NPEPPS	Puromycin-sensitive aminopeptidase	-1
M02	quercetin	Q13085	ACACA	Acetyl-CoA carboxylase 1	-1
M15	vitamin K	P10451	SPP1	Osteopontin	-1
M16	vitamin P	P00918	CA2	Carbonic anhydrase 2	-1
M16	vitamin P	P27815	PDE4A	cAMP-specific 3',5'-cyclic phosphodiesterase 4A	-1
M16	vitamin P	Q07343	PDE4B	cAMP-specific 3',5'-cyclic phosphodiesterase 4B	-1
M18	(-)-epicatechin	P00918	CA2	Carbonic anhydrase 2	-1

## Sheet: Sheet2
Compound ID	Compound Name (_qt represent deglycosylation compounds)	UniProt ID	Gene Name	Target Name
M01	kaempferol	O14732	IMPA2	Inositol monophosphatase 2	-1
M01	kaempferol	O14920	IKBKB	Inhibitor of nuclear factor kappa-B kinase subunit beta	-1
M01	kaempferol	O75469	NR1I2	Nuclear receptor subfamily 1 group I member 2	1
M01	kaempferol	O95749	GGPS1	Geranylgeranyl pyrophosphate synthetase	-1
M01	kaempferol	P01375	TNF	Tumor necrosis factor	-1
M01	kaempferol	P03372	ESR1	Estrogen receptor	-1
M01	kaempferol	P03956	MMP1	Interstitial collagenase	-1
M01	kaempferol	P03973	SLPI	Antileukoproteinase	-1
M01	kaempferol	P04798	CYP1A1	Cytochrome P450 1A1	-1
M01	kaempferol	P05177	CYP1A2	Cytochrome P450 1A2	-1
M01	kaempferol	P05362	ICAM1	Intercellular adhesion molecule 1	-1
M01	kaempferol	P05412	JUN	Transcription factor AP-1	-1
M01	kaempferol	P06213	INSR	Insulin receptor	-1
M01	kaempferol	P06493	CDK1	Cell division control protein 2 homolog	-1
M01	kaempferol	P07900	HSP90AA1	Heat shock protein HSP 90-alpha	-1
M01	kaempferol	P08684	CYP3A4	Cytochrome P450 3A4	-1
M01	kaempferol	P09211	GSTP1	Glutathione S-transferase P	-1
M01	kaempferol	P09488	GSTM1	Glutathione S-transferase Mu 1	-1
M01	kaempferol	P09601	HMOX1	Heme oxygenase 1	-1
M01	kaempferol	P09917	ALOX5	Arachidonate 5-lipoxygenase	-1
M01	kaempferol	P10275	AR	Androgen receptor	-1
M01	kaempferol	P10415	BCL2	Apoptosis regulator Bcl-2	-1
M01	kaempferol	P11309	PIM1	Proto-oncogene serine/threonine-protein kinase Pim-1	-1
M01	kaempferol	P11388	TOP2A	DNA topoisomerase 2-alpha	-1
M01	kaempferol	P11511	CYP19A1	Cytochrome P450 19A1	-1
M01	kaempferol	P14672	SLC2A4	Solute carrier family 2, facilitated glucose transporter member 4	-1
M01	kaempferol	P16581	SELE	E-selectin	-1
M01	kaempferol	P18031	PTPN1	Tyrosine-protein phosphatase non-receptor type 1	-1
M01	kaempferol	P18054	ALOX12	Arachidonate 12-lipoxygenase, 12S-type	-1
M01	kaempferol	P19320	VCAM1	Vascular cell adhesion protein 1	-1
M01	kaempferol	P21397	MAOA	Amine oxidase [flavin-containing] A	-1
M01	kaempferol	P23219	PTGS1	Prostaglandin G/H synthase 1	-1
M01	kaempferol	P24941	CDK2	Cell division protein kinase 2	-1
M01	kaempferol	P27338	MAOB	Amine oxidase [flavin-containing] B	-1
M01	kaempferol	P27487	DPP4	Dipeptidyl peptidase 4	-1
M01	kaempferol	P28161	GSTM2	Glutathione S-transferase Mu 2	-1
M01	kaempferol	P35228	NOS2	Nitric oxide synthase, inducible	-1
M01	kaempferol	P35354	PTGS2	Prostaglandin G/H synthase 2	-1
M01	kaempferol	P35869	AHR	Aryl hydrocarbon receptor	1
M01	kaempferol	P37058	HSD17B3	Estradiol 17-beta-dehydrogenase 3	-1
M01	kaempferol	P37231	PPARG	Peroxisome proliferator-activated receptor gamma	1
M01	kaempferol	P42224	STAT1	Signal transducer and activator of transcription 1-alpha/beta	-1
M01	kaempferol	P42330	AKR1C3	Aldo-keto reductase family 1 member C3	-1
M01	kaempferol	P42336	PIK3CA	Phosphatidylinositol-4,5-bisphosphate 3-kinase catalytic subunit alpha isoform	-1
M01	kaempferol	P42574	CASP3	Caspase-3	-1
M01	kaempferol	P45983	MAPK8	Mitogen-activated protein kinase 8	-1
M01	kaempferol	P47989	XDH	Xanthine dehydrogenase/oxidase	-1
M01	kaempferol	P48736	PIK3CG	Phosphatidylinositol-4,5-bisphosphate 3-kinase catalytic subunit gamma isoform	-1
M01	kaempferol	P49841	GSK3B	Glycogen synthase kinase-3 beta	-1
M01	kaempferol	P49895	DIO1	Type I iodothyronine deiodinase	-1
M01	kaempferol	P67870	CSNK2B	Casein kinase II subunit beta	-1
M01	kaempferol	P68400	CSNK2A1	Casein kinase II subunit alpha	-1
M01	kaempferol	Q04206	RELA	Transcription factor p65	-1
M01	kaempferol	Q07812	BAX	Apoptosis regulator BAX	-1
M01	kaempferol	Q14994	NR1I3	Nuclear receptor subfamily 1 group I member 3	-1
M01	kaempferol	Q16539	MAPK14	Mitogen-activated protein kinase 14	-1
M01	kaempferol	Q16678	CYP1B1	Cytochrome P450 1B1	-1
M01	kaempferol	Q92731	ESR2	Estrogen receptor beta	1
M01	kaempferol	Q92819	HAS2	Hyaluronan synthase 2	-1
M02	quercetin	O14746	TERT	Telomerase reverse transcriptase	-1
M02	quercetin	O14757	CHEK1	Serine/threonine-protein kinase Chk1	-1
M02	quercetin	P00533	EGFR	Epidermal growth factor receptor	-1
M02	quercetin	P03372	ESR1	Estrogen receptor	-1
M02	quercetin	P07477	PRSS1	Trypsin-1	-1
M02	quercetin	P07900	HSP90AA1	Heat shock protein HSP 90-alpha	-1
M02	quercetin	P09917	ALOX5	Arachidonate 5-lipoxygenase	-1
M02	quercetin	P10275	AR	Androgen receptor	-1
M02	quercetin	P11309	PIM1	Proto-oncogene serine/threonine-protein kinase Pim-1	-1
M02	quercetin	P11511	CYP19A1	Cytochrome P450 19A1	-1
M02	quercetin	P15121	AKR1B1	Aldose reductase	-1
M02	quercetin	P18031	PTPN1	Tyrosine-protein phosphatase non-receptor type 1	-1
M02	quercetin	P18054	ALOX12	Arachidonate 12-lipoxygenase, 12S-type	-1
M02	quercetin	P19793	RXRA	Retinoic acid receptor RXR-alpha	1
M02	quercetin	P20248	CCNA2	Cyclin-A2	-1
M02	quercetin	P21397	MAOA	Amine oxidase [flavin-containing] A	-1
M02	quercetin	P21917	DRD4	D(4) dopamine receptor	1
M02	quercetin	P23219	PTGS1	Prostaglandin G/H synthase 1	-1
M02	quercetin	P24941	CDK2	Cell division protein kinase 2	-1
M02	quercetin	P35354	PTGS2	Prostaglandin G/H synthase 2	-1
M02	quercetin	P37058	HSD17B3	Estradiol 17-beta-dehydrogenase 3	-1
M02	quercetin	P37231	PPARG	Peroxisome proliferator-activated receptor gamma	1
M02	quercetin	P42336	PIK3CA	Phosphatidylinositol-4,5-bisphosphate 3-kinase catalytic subunit alpha isoform	-1
M02	quercetin	P48736	PIK3CG	Phosphatidylinositol-4,5-bisphosphate 3-kinase catalytic subunit gamma isoform	-1
M02	quercetin	P49841	GSK3B	Glycogen synthase kinase-3 beta	-1
M02	quercetin	P67870	CSNK2B	Casein kinase II subunit beta	-1
M02	quercetin	P68400	CSNK2A1	Casein kinase II subunit alpha	-1
M02	quercetin	Q14432	PDE3A	cGMP-inhibited 3',5'-cyclic phosphodiesterase A	-1
M02	quercetin	Q15596	NCOA2	Nuclear receptor coactivator 2	-1
M02	quercetin	Q16539	MAPK14	Mitogen-activated protein kinase 14	-1
M02	quercetin	Q92731	ESR2	Estrogen receptor beta	1
M03	rhodiosin_qt	O14732	IMPA2	Inositol monophosphatase 2	-1
M03	rhodiosin_qt	O14757	CHEK1	Serine/threonine-protein kinase Chk1	-1
M03	rhodiosin_qt	O95749	GGPS1	Geranylgeranyl pyrophosphate synthetase	-1
M03	rhodiosin_qt	P00918	CA2	Carbonic anhydrase 2	-1
M03	rhodiosin_qt	P03372	ESR1	Estrogen receptor	-1
M03	rhodiosin_qt	P07477	PRSS1	Trypsin-1	-1
M03	rhodiosin_qt	P08709	F7	Coagulation factor VII	-1
M03	rhodiosin_qt	P10275	AR	Androgen receptor	-1
M03	rhodiosin_qt	P11309	PIM1	Proto-oncogene serine/threonine-protein kinase Pim-1	-1
M03	rhodiosin_qt	P11388	TOP2A	DNA topoisomerase 2-alpha	-1
M03	rhodiosin_qt	P18031	PTPN1	Tyrosine-protein phosphatase non-receptor type 1	-1
M03	rhodiosin_qt	P18054	ALOX12	Arachidonate 12-lipoxygenase, 12S-type	-1
M03	rhodiosin_qt	P20248	CCNA2	Cyclin-A2	-1
M03	rhodiosin_qt	P23219	PTGS1	Prostaglandin G/H synthase 1	-1
M03	rhodiosin_qt	P29218	IMPA1	Inositol monophosphatase	-1
M03	rhodiosin_qt	P29474	NOS3	Nitric-oxide synthase, endothelial	-1
M03	rhodiosin_qt	P35228	NOS2	Nitric oxide synthase, inducible	-1
M03	rhodiosin_qt	P35354	PTGS2	Prostaglandin G/H synthase 2	-1
M03	rhodiosin_qt	P37231	PPARG	Peroxisome proliferator-activated receptor gamma	1
M03	rhodiosin_qt	Q14524	SCN5A	Sodium channel protein type 5 subunit alpha	-1
M03	rhodiosin_qt	Q92731	ESR2	Estrogen receptor beta	1
M04	rutin_qt	O14746	TERT	Telomerase reverse transcriptase	-1
M04	rutin_qt	O14757	CHEK1	Serine/threonine-protein kinase Chk1	-1
M04	rutin_qt	O95749	GGPS1	Geranylgeranyl pyrophosphate synthetase	-1
M04	rutin_qt	P00533	EGFR	Epidermal growth factor receptor	-1
M04	rutin_qt	P01308	INS	Insulin	-1
M04	rutin_qt	P01375	TNF	Tumor necrosis factor	-1
M04	rutin_qt	P01584	IL1B	Interleukin-1 beta	-1
M04	rutin_qt	P01857	IGHG1	Ig gamma-1 chain C region	-1
M04	rutin_qt	P03372	ESR1	Estrogen receptor	-1
M04	rutin_qt	P04035	HMGCR	3-hydroxy-3-methylglutaryl-coenzyme A reductase	-1
M04	rutin_qt	P04040	CAT	Catalase	-1
M04	rutin_qt	P05107	ITGB2	Integrin beta-2	-1
M04	rutin_qt	P05231	IL6	Interleukin-6	-1
M04	rutin_qt	P06734	FCER2	Low affinity immunoglobulin epsilon Fc receptor	-1
M04	rutin_qt	P07477	PRSS1	Trypsin-1	-1
M04	rutin_qt	P07900	HSP90AA1	Heat shock protein HSP 90-alpha	-1
M04	rutin_qt	P09211	GSTP1	Glutathione S-transferase P	-1
M04	rutin_qt	P09917	ALOX5	Arachidonate 5-lipoxygenase	-1
M04	rutin_qt	P10145	IL8	Interleukin-8	-1
M04	rutin_qt	P11309	PIM1	Proto-oncogene serine/threonine-protein kinase Pim-1	-1
M04	rutin_qt	P11511	CYP19A1	Cytochrome P450 19A1	-1
M04	rutin_qt	P15121	AKR1B1	Aldose reductase	-1
M04	rutin_qt	P16435	POR	NADPH--cytochrome P450 reductase	-1
M04	rutin_qt	P18054	ALOX12	Arachidonate 12-lipoxygenase, 12S-type	-1
M04	rutin_qt	P20248	CCNA2	Cyclin-A2	-1
M04	rutin_qt	P21397	MAOA	Amine oxidase [flavin-containing] A	-1
M04	rutin_qt	P21730	C5AR1	C5a anaphylatoxin chemotactic receptor 1	-1
M04	rutin_qt	P21731	TBXA2R	Thromboxane A2 receptor	-1
M04	rutin_qt	P21917	DRD4	D(4) dopamine receptor	1
M04	rutin_qt	P23219	PTGS1	Prostaglandin G/H synthase 1	-1
M04	rutin_qt	P24941	CDK2	Cell division protein kinase 2	-1
M04	rutin_qt	P27487	DPP4	Dipeptidyl peptidase 4	-1
M04	rutin_qt	P35228	NOS2	Nitric oxide synthase, inducible	-1
M04	rutin_qt	P37058	HSD17B3	Estradiol 17-beta-dehydrogenase 3	-1
M04	rutin_qt	P42336	PIK3CA	Phosphatidylinositol-4,5-bisphosphate 3-kinase catalytic subunit alpha isoform	-1
M04	rutin_qt	P42574	CASP3	Caspase-3	-1
M04	rutin_qt	P48736	PIK3CG	Phosphatidylinositol-4,5-bisphosphate 3-kinase catalytic subunit gamma isoform	-1
M04	rutin_qt	P49841	GSK3B	Glycogen synthase kinase-3 beta	-1
M04	rutin_qt	P49895	DIO1	Type I iodothyronine deiodinase	-1
M04	rutin_qt	P67870	CSNK2B	Casein kinase II subunit beta	-1
M04	rutin_qt	P68400	CSNK2A1	Casein kinase II subunit alpha	-1
M04	rutin_qt	Q04206	RELA	Transcription factor p65	-1
M04	rutin_qt	Q15596	NCOA2	Nuclear receptor coactivator 2	-1
M04	rutin_qt	Q15788	NCOA1	Nuclear receptor coactivator 1	-1
M04	rutin_qt	Q16539	MAPK14	Mitogen-activated protein kinase 14	-1
M04	rutin_qt	Q92731	ESR2	Estrogen receptor beta	1
M04	rutin_qt	Q92819	HAS2	Hyaluronan synthase 2	-1
M05	(24R)-4alpha-Methyl-24-ethylcholesta-7,25-dien-3beta-ylacetate	P03372	ESR1	Estrogen receptor	1
M06	7-O-Methylluteolin-6-C-beta-glucoside_qt	P00918	CA2	Carbonic anhydrase 2	-1
M06	7-O-Methylluteolin-6-C-beta-glucoside_qt	P03372	ESR1	Estrogen receptor	1
M06	7-O-Methylluteolin-6-C-beta-glucoside_qt	P07900	HSP90AA1	Heat shock protein HSP 90-alpha	-1
M06	7-O-Methylluteolin-6-C-beta-glucoside_qt	P09917	ALOX5	Arachidonate 5-lipoxygenase	-1
M06	7-O-Methylluteolin-6-C-beta-glucoside_qt	P10275	AR	Androgen receptor	-1
M06	7-O-Methylluteolin-6-C-beta-glucoside_qt	P11309	PIM1	Proto-oncogene serine/threonine-protein kinase Pim-1	-1
M06	7-O-Methylluteolin-6-C-beta-glucoside_qt	P18031	PTPN1	Tyrosine-protein phosphatase non-receptor type 1	-1
M06	7-O-Methylluteolin-6-C-beta-glucoside_qt	P23219	PTGS1	Prostaglandin G/H synthase 1	-1
M06	7-O-Methylluteolin-6-C-beta-glucoside_qt	P24941	CDK2	Cell division protein kinase 2	-1
M06	7-O-Methylluteolin-6-C-beta-glucoside_qt	P27338	MAOB	Amine oxidase [flavin-containing] B	-1
M06	7-O-Methylluteolin-6-C-beta-glucoside_qt	P27487	DPP4	Dipeptidyl peptidase 4	-1
M06	7-O-Methylluteolin-6-C-beta-glucoside_qt	P35228	NOS2	Nitric oxide synthase, inducible	-1
M06	7-O-Methylluteolin-6-C-beta-glucoside_qt	P35354	PTGS2	Prostaglandin G/H synthase 2	-1
M06	7-O-Methylluteolin-6-C-beta-glucoside_qt	P37231	PPARG	Peroxisome proliferator-activated receptor gamma	1
M06	7-O-Methylluteolin-6-C-beta-glucoside_qt	P48736	PIK3CG	Phosphatidylinositol-4,5-bisphosphate 3-kinase catalytic subunit gamma isoform	-1
M06	7-O-Methylluteolin-6-C-beta-glucoside_qt	P49841	GSK3B	Glycogen synthase kinase-3 beta	-1
M06	7-O-Methylluteolin-6-C-beta-glucoside_qt	Q15596	NCOA2	Nuclear receptor coactivator 2	-1
M06	7-O-Methylluteolin-6-C-beta-glucoside_qt	Q16539	MAPK14	Mitogen-activated protein kinase 14	-1
M06	7-O-Methylluteolin-6-C-beta-glucoside_qt	Q92731	ESR2	Estrogen receptor beta	1
M07	Glycitein	O14732	IMPA2	Inositol monophosphatase 2	-1
M07	Glycitein	O14757	CHEK1	Serine/threonine-protein kinase Chk1	-1
M07	Glycitein	P00918	CA2	Carbonic anhydrase 2	-1
M07	Glycitein	P03372	ESR1	Estrogen receptor	1
M07	Glycitein	P05067	APP	Amyloid beta A4 protein	-1
M07	Glycitein	P07900	HSP90AA1	Heat shock protein HSP 90-alpha	-1
M07	Glycitein	P09917	ALOX5	Arachidonate 5-lipoxygenase	-1
M07	Glycitein	P10275	AR	Androgen receptor	-1
M07	Glycitein	P11309	PIM1	Proto-oncogene serine/threonine-protein kinase Pim-1	-1
M07	Glycitein	P14174	MIF	Macrophage migration inhibitory factor	-1
M07	Glycitein	P15559	NQO1	NAD(P)H dehydrogenase [quinone] 1	-1
M07	Glycitein	P17612	PRKACA	cAMP-dependent protein kinase catalytic subunit alpha	-1
M07	Glycitein	P18031	PTPN1	Tyrosine-protein phosphatase non-receptor type 1	-1
M07	Glycitein	P18054	ALOX12	Arachidonate 12-lipoxygenase, 12S-type	-1
M07	Glycitein	P20248	CCNA2	Cyclin-A2	-1
M07	Glycitein	P21397	MAOA	Amine oxidase [flavin-containing] A	-1
M07	Glycitein	P22894	MMP8	Neutrophil collagenase	-1
M07	Glycitein	P24941	CDK2	Cell division protein kinase 2	-1
M07	Glycitein	P27338	MAOB	Amine oxidase [flavin-containing] B	-1
M07	Glycitein	P29218	IMPA1	Inositol monophosphatase	-1
M07	Glycitein	P35228	NOS2	Nitric oxide synthase, inducible	-1
M07	Glycitein	P35354	PTGS2	Prostaglandin G/H synthase 2	-1
M07	Glycitein	P37231	PPARG	Peroxisome proliferator-activated receptor gamma	1
M07	Glycitein	P45452	MMP13	Collagenase 3	-1
M07	Glycitein	P48736	PIK3CG	Phosphatidylinositol-4,5-bisphosphate 3-kinase catalytic subunit gamma isoform	-1
M07	Glycitein	P49841	GSK3B	Glycogen synthase kinase-3 beta	-1
M07	Glycitein	P62158	CALM	Calmodulin	-1
M07	Glycitein	Q15596	NCOA2	Nuclear receptor coactivator 2	-1
M07	Glycitein	Q16539	MAPK14	Mitogen-activated protein kinase 14	-1
M07	Glycitein	Q92731	ESR2	Estrogen receptor beta	1
M07	Glycitein	Q9H4B7	TUBB1	Tubulin beta-1 chain	-1
M08	Physcion-8-O-beta-D-gentiobioside_qt	P00918	CA2	Carbonic anhydrase 2	-1
M08	Physcion-8-O-beta-D-gentiobioside_qt	P03372	ESR1	Estrogen receptor	-1
M08	Physcion-8-O-beta-D-gentiobioside_qt	P07477	PRSS1	Trypsin-1	-1
M08	Physcion-8-O-beta-D-gentiobioside_qt	P07900	HSP90AA1	Heat shock protein HSP 90-alpha	-1
M08	Physcion-8-O-beta-D-gentiobioside_qt	P10275	AR	Androgen receptor	-1
M08	Physcion-8-O-beta-D-gentiobioside_qt	P11309	PIM1	Proto-oncogene serine/threonine-protein kinase Pim-1	-1
M08	Physcion-8-O-beta-D-gentiobioside_qt	P18031	PTPN1	Tyrosine-protein phosphatase non-receptor type 1	-1
M08	Physcion-8-O-beta-D-gentiobioside_qt	P20248	CCNA2	Cyclin-A2	-1
M08	Physcion-8-O-beta-D-gentiobioside_qt	P23219	PTGS1	Prostaglandin G/H synthase 1	-1
M08	Physcion-8-O-beta-D-gentiobioside_qt	P24941	CDK2	Cell division protein kinase 2	-1
M08	Physcion-8-O-beta-D-gentiobioside_qt	P27487	DPP4	Dipeptidyl peptidase 4	-1
M08	Physcion-8-O-beta-D-gentiobioside_qt	P35228	NOS2	Nitric oxide synthase, inducible	-1
M08	Physcion-8-O-beta-D-gentiobioside_qt	P35354	PTGS2	Prostaglandin G/H synthase 2	-1
M08	Physcion-8-O-beta-D-gentiobioside_qt	P37231	PPARG	Peroxisome proliferator-activated receptor gamma	1
M08	Physcion-8-O-beta-D-gentiobioside_qt	P48736	PIK3CG	Phosphatidylinositol-4,5-bisphosphate 3-kinase catalytic subunit gamma isoform	-1
M08	Physcion-8-O-beta-D-gentiobioside_qt	P49841	GSK3B	Glycogen synthase kinase-3 beta	-1
M08	Physcion-8-O-beta-D-gentiobioside_qt	Q07820	MCL1	Induced myeloid leukemia cell differentiation protein Mcl-1	-1
M08	Physcion-8-O-beta-D-gentiobioside_qt	Q16539	MAPK14	Mitogen-activated protein kinase 14	-1
M08	Physcion-8-O-beta-D-gentiobioside_qt	Q92731	ESR2	Estrogen receptor beta	1
M09	mutatoxanthin	P13631	RARG	Retinoic acid receptor gamma-1	1
M02	quercetin	O14493	CLDN4	Claudin-4	-1
M02	quercetin	O14625	CXCL11	C-X-C motif chemokine 11	-1
M02	quercetin	O15111	CHUK	Inhibitor of nuclear factor kappa-B kinase subunit alpha	-1
M02	quercetin	O15392	BIRC5	Baculoviral IAP repeat-containing protein 5	-1
M02	quercetin	O43451	MGAM	Maltase-glucoamylase, intestinal	-1
M02	quercetin	O75469	NR1I2	Nuclear receptor subfamily 1 group I member 2	1
M02	quercetin	O96017	CHEK2	Serine/threonine-protein kinase Chk2	-1
M02	quercetin	P00533	EGFR	Epidermal growth factor receptor	-1
M02	quercetin	P00749	PLAU	Urokinase-type plasminogen activator	-1
M02	quercetin	P00750	PLAT	Tissue-type plasminogen activator	-1
M02	quercetin	P01100	FOS	Proto-oncogene protein c-fos	-1
M02	quercetin	P01106	MYC	Myc proto-oncogene protein	-1
M02	quercetin	P01133	EGF	Pro-epidermal growth factor	-1
M02	quercetin	P01137	TGFB1	Transforming growth factor beta-1	-1
M02	quercetin	P01344	IGF2	Insulin-like growth factor II	-1
M02	quercetin	P01375	TNF	Tumor necrosis factor	-1
M02	quercetin	P01579	IFNG	Interferon gamma	-1
M02	quercetin	P01583	IL1A	Interleukin-1 alpha	-1
M02	quercetin	P01584	IL1B	Interleukin-1 beta	-1
M02	quercetin	P02452	COL1A1	Collagen alpha-1(I) chain	-1
M02	quercetin	P02461	COL3A1	Collagen alpha-1(III) chain	-1
M02	quercetin	P02741	CRP	C-reactive protein	-1
M02	quercetin	P02778	CXCL10	Small inducible cytokine B10	-1
M02	quercetin	P03372	ESR1	Estrogen receptor	-1
M02	quercetin	P03956	MMP1	Interstitial collagenase	-1
M02	quercetin	P04040	CAT	Catalase	-1
M02	quercetin	P04049	RAF1	RAF proto-oncogene serine/threonine-protein kinase	-1
M02	quercetin	P04626	ERBB2	Receptor tyrosine-protein kinase erbB-2	-1
M02	quercetin	P04637	TP53	Cellular tumor antigen p53	-1
M02	quercetin	P04792	HSPB1	Heat shock protein beta-1	-1
M02	quercetin	P04798	CYP1A1	Cytochrome P450 1A1	-1
M02	quercetin	P05121	SERPINE1	Plasminogen activator inhibitor 1	-1
M02	quercetin	P05164	MPO	Myeloperoxidase	-1
M02	quercetin	P05177	CYP1A2	Cytochrome P450 1A2	-1
M02	quercetin	P05231	IL6	Interleukin-6	-1
M02	quercetin	P05362	ICAM1	Intercellular adhesion molecule 1	-1
M02	quercetin	P05412	JUN	Transcription factor AP-1	-1
M02	quercetin	P06213	INSR	Insulin receptor	-1
M02	quercetin	P06400	RB1	Retinoblastoma-associated protein	-1
M02	quercetin	P06493	CDK1	Cell division control protein 2 homolog	-1
M02	quercetin	P07204	THBD	Thrombomodulin	-1
M02	quercetin	P07339	CTSD	Cathepsin D	-1
M02	quercetin	P08253	MMP2	72 kDa type IV collagenase	-1
M02	quercetin	P08294	SOD3	Extracellular superoxide dismutase [Cu-Zn]	-1
M02	quercetin	P08684	CYP3A4	Cytochrome P450 3A4	-1
M02	quercetin	P09211	GSTP1	Glutathione S-transferase P	-1
M02	quercetin	P09488	GSTM1	Glutathione S-transferase Mu 1	-1
M02	quercetin	P09601	HMOX1	Heme oxygenase 1	-1
M02	quercetin	P09917	ALOX5	Arachidonate 5-lipoxygenase	-1
M02	quercetin	P10145	IL8	Interleukin-8	-1
M02	quercetin	P10275	AR	Androgen receptor	-1
M02	quercetin	P10415	BCL2	Apoptosis regulator Bcl-2	-1
M02	quercetin	P10914	IRF1	Interferon regulatory factor 1	-1
M02	quercetin	P11021	HSPA5	78 kDa glucose-regulated protein	-1
M02	quercetin	P11309	PIM1	Proto-oncogene serine/threonine-protein kinase Pim-1	-1
M02	quercetin	P11387	TOP1	DNA topoisomerase 1	-1
M02	quercetin	P11388	TOP2A	DNA topoisomerase 2-alpha	-1
M02	quercetin	P11926	ODC1	Ornithine decarboxylase	-1
M02	quercetin	P12643	BMP2	Bone morphogenetic protein 2	-1
M02	quercetin	P13500	CCL2	Small inducible cytokine A2	-1
M02	quercetin	P13726	F3	Tissue factor	-1
M02	quercetin	P14598	NCF1	Neutrophil cytosol factor 1	-1
M02	quercetin	P14635	CCNB1	G2/mitotic-specific cyclin-B1	-1
M02	quercetin	P14672	SLC2A4	Solute carrier family 2, facilitated glucose transporter member 4	-1
M02	quercetin	P14780	MMP9	Matrix metalloproteinase-9	-1
M02	quercetin	P15309	ACPP	Prostatic acid phosphatase	-1
M02	quercetin	P15559	NQO1	NAD(P)H dehydrogenase [quinone] 1	-1
M02	quercetin	P15692	VEGFA	Vascular endothelial growth factor A	-1
M02	quercetin	P16435	POR	NADPH--cytochrome P450 reductase	-1
M02	quercetin	P16581	SELE	E-selectin	-1
M02	quercetin	P17252	PRKCA	Protein kinase C alpha type	-1
M02	quercetin	P17936	IGFBP3	Insulin-like growth factor-binding protein 3	-1
M02	quercetin	P19320	VCAM1	Vascular cell adhesion protein 1	-1
M02	quercetin	P19419	ELK1	ETS domain-containing protein Elk-1	-1
M02	quercetin	P19875	CXCL2	C-X-C motif chemokine 2	-1
M02	quercetin	P21860	ERBB3	Receptor tyrosine-protein kinase erbB-3	-1
M02	quercetin	P22301	IL10	Interleukin-10	-1
M02	quercetin	P23219	PTGS1	Prostaglandin G/H synthase 1	-1
M02	quercetin	P24385	CCND1	G1/S-specific cyclin-D1	-1
M02	quercetin	P25963	NFKBIA	NF-kappa-B inhibitor alpha	-1
M02	quercetin	P27169	PON1	Serum paraoxonase/arylesterase 1	-1
M02	quercetin	P27487	DPP4	Dipeptidyl peptidase 4	-1
M02	quercetin	P28161	GSTM2	Glutathione S-transferase Mu 2	-1
M02	quercetin	P28482	MAPK1	Mitogen-activated protein kinase 1	1
M02	quercetin	P29474	NOS3	Nitric-oxide synthase, endothelial	-1
M02	quercetin	P29965	CD40LG	CD40 ligand	-1
M02	quercetin	P35228	NOS2	Nitric oxide synthase, inducible	-1
M02	quercetin	P35354	PTGS2	Prostaglandin G/H synthase 2	-1
M02	quercetin	P35869	AHR	Aryl hydrocarbon receptor	1
M02	quercetin	P37231	PPARG	Peroxisome proliferator-activated receptor gamma	1
M02	quercetin	P38936	CDKN1A	Cyclin-dependent kinase inhibitor 1	-1
M02	quercetin	P42224	STAT1	Signal transducer and activator of transcription 1-alpha/beta	-1
M02	quercetin	P42574	CASP3	Caspase-3	-1
M02	quercetin	P42771	CDKN2A	Cyclin-dependent kinase inhibitor 2A, isoforms 1/2/3	-1
M02	quercetin	P43115	PTGER3	Prostaglandin E2 receptor, EP3 subtype	1
M02	quercetin	P47989	XDH	Xanthine dehydrogenase/oxidase	-1
M02	quercetin	P49841	GSK3B	Glycogen synthase kinase-3 beta	-1
M02	quercetin	P49888	SULT1E1	Estrogen sulfotransferase	-1
M02	quercetin	P49895	DIO1	Type I iodothyronine deiodinase	-1
M02	quercetin	P52789	HK2	Hexokinase-2	-1
M02	quercetin	P55211	CASP9	Caspase-9	-1
M02	quercetin	P56537	EIF6	Eukaryotic translation initiation factor 6	-1
M02	quercetin	P60484	PTEN	Phosphatidylinositol 3,4,5-trisphosphate 3-phosphatase and dual-specificity protein phosphatase PTEN	-1
M02	quercetin	P60568	IL2	Interleukin-2	-1
M02	quercetin	Q00613	HSF1	Heat shock factor protein 1	-1
M02	quercetin	Q01094	E2F1	Transcription factor E2F1	-1
M02	quercetin	Q03135	CAV1	Caveolin-1	-1
M02	quercetin	Q03181	PPARD	Peroxisome proliferator-activated receptor delta	-1
M02	quercetin	Q04206	RELA	Transcription factor p65	-1
M02	quercetin	Q06455	RUNX1T1	Protein CBFA2T1	-1
M02	quercetin	Q07812	BAX	Apoptosis regulator BAX	-1
M02	quercetin	Q07817	BCL2L1	Apoptosis regulator Bcl-X	-1
M02	quercetin	Q07869	PPARA	Peroxisome proliferator-activated receptor alpha	1
M02	quercetin	Q13950	RUNX2	Runt-related transcription factor 2	-1
M02	quercetin	Q14209	E2F2	Transcription factor E2F2	-1
M02	quercetin	Q14790	CASP8	Caspase-8	-1
M02	quercetin	Q14994	NR1I3	Nuclear receptor subfamily 1 group I member 3	-1
M02	quercetin	Q15113	PCOLCE	Procollagen C-endopeptidase enhancer 1	-1
M02	quercetin	Q16236	NFE2L2	Nuclear factor erythroid 2-related factor 2	-1
M02	quercetin	Q16665	HIF1A	Hypoxia-inducible factor 1 alpha	-1
M02	quercetin	Q16678	CYP1B1	Cytochrome P450 1B1	-1
M02	quercetin	Q92731	ESR2	Estrogen receptor beta	1
M02	quercetin	Q92819	HAS2	Hyaluronan synthase 2	-1
M02	quercetin	Q96JK2	DCAF5	DDB1- and CUL4-associated factor 5	-1
M02	quercetin	Q99801	NKX3-1	Homeobox protein Nkx-3.1	-1
M02	quercetin	Q9NRD8	DUOX2	Dual oxidase 2	-1
M02	quercetin	Q9NS23	RASSF1	Ras association domain-containing protein 1	-1
M02	quercetin	Q9UII4	HERC5	E3 ISG15--protein ligase HERC5	-1
M02	quercetin	Q9UNQ0	ABCG2	ATP-binding cassette sub-family G member 2	-1
M10	astragalin_qt	O14732	IMPA2	Inositol monophosphatase 2	-1
M10	astragalin_qt	O14757	CHEK1	Serine/threonine-protein kinase Chk1	-1
M10	astragalin_qt	P00918	CA2	Carbonic anhydrase 2	-1
M10	astragalin_qt	P03372	ESR1	Estrogen receptor	-1
M10	astragalin_qt	P07900	HSP90AA1	Heat shock protein HSP 90-alpha	-1
M10	astragalin_qt	P09917	ALOX5	Arachidonate 5-lipoxygenase	-1
M10	astragalin_qt	P10275	AR	Androgen receptor	-1
M10	astragalin_qt	P11309	PIM1	Proto-oncogene serine/threonine-protein kinase Pim-1	-1
M10	astragalin_qt	P11511	CYP19A1	Cytochrome P450 19A1	-1
M10	astragalin_qt	P14174	MIF	Macrophage migration inhibitory factor	-1
M10	astragalin_qt	P18031	PTPN1	Tyrosine-protein phosphatase non-receptor type 1	-1
M10	astragalin_qt	P18054	ALOX12	Arachidonate 12-lipoxygenase, 12S-type	-1
M10	astragalin_qt	P20248	CCNA2	Cyclin-A2	-1
M10	astragalin_qt	P21397	MAOA	Amine oxidase [flavin-containing] A	-1
M10	astragalin_qt	P23219	PTGS1	Prostaglandin G/H synthase 1	-1
M10	astragalin_qt	P24941	CDK2	Cell division protein kinase 2	-1
M10	astragalin_qt	P27338	MAOB	Amine oxidase [flavin-containing] B	-1
M10	astragalin_qt	P29218	IMPA1	Inositol monophosphatase	-1
M10	astragalin_qt	P35228	NOS2	Nitric oxide synthase, inducible	-1
M10	astragalin_qt	P35354	PTGS2	Prostaglandin G/H synthase 2	-1
M10	astragalin_qt	P37058	HSD17B3	Estradiol 17-beta-dehydrogenase 3	-1
M10	astragalin_qt	P37231	PPARG	Peroxisome proliferator-activated receptor gamma	1
M10	astragalin_qt	P42336	PIK3CA	Phosphatidylinositol-4,5-bisphosphate 3-kinase catalytic subunit alpha isoform	-1
M10	astragalin_qt	P48736	PIK3CG	Phosphatidylinositol-4,5-bisphosphate 3-kinase catalytic subunit gamma isoform	-1
M10	astragalin_qt	P49841	GSK3B	Glycogen synthase kinase-3 beta	-1
M10	astragalin_qt	P67870	CSNK2B	Casein kinase II subunit beta	-1
M10	astragalin_qt	P68400	CSNK2A1	Casein kinase II subunit alpha	-1
M10	astragalin_qt	Q04760	GLO1	Lactoylglutathione lyase	-1
M10	astragalin_qt	Q15596	NCOA2	Nuclear receptor coactivator 2	-1
M10	astragalin_qt	Q16539	MAPK14	Mitogen-activated protein kinase 14	-1
M10	astragalin_qt	Q92731	ESR2	Estrogen receptor beta	1
M11	cholesteryl benzoate	P10275	AR	Androgen receptor	1
M11	cholesteryl benzoate	P17612	PRKACA	cAMP-dependent protein kinase catalytic subunit alpha	-1
M11	cholesteryl benzoate	P18405	SRD5A1	3-oxo-5-alpha-steroid 4-dehydrogenase 1	-1
M11	cholesteryl benzoate	P30304	CDC25A	M-phase inducer phosphatase 1	1
M11	cholesteryl benzoate	P31213	SRD5A2	3-oxo-5-alpha-steroid 4-dehydrogenase 2	-1
M12	isorhamnetin-3-O-β-rutinoside_qt	P00734	F2	Prothrombin	-1
M12	isorhamnetin-3-O-β-rutinoside_qt	P00918	CA2	Carbonic anhydrase 2	-1
M12	isorhamnetin-3-O-β-rutinoside_qt	P03372	ESR1	Estrogen receptor	-1
M12	isorhamnetin-3-O-β-rutinoside_qt	P07900	HSP90AA1	Heat shock protein HSP 90-alpha	-1
M12	isorhamnetin-3-O-β-rutinoside_qt	P09917	ALOX5	Arachidonate 5-lipoxygenase	-1
M12	isorhamnetin-3-O-β-rutinoside_qt	P10275	AR	Androgen receptor	-1
M12	isorhamnetin-3-O-β-rutinoside_qt	P11309	PIM1	Proto-oncogene serine/threonine-protein kinase Pim-1	-1
M12	isorhamnetin-3-O-β-rutinoside_qt	P11511	CYP19A1	Cytochrome P450 19A1	-1
M12	isorhamnetin-3-O-β-rutinoside_qt	P14174	MIF	Macrophage migration inhibitory factor	-1
M12	isorhamnetin-3-O-β-rutinoside_qt	P15559	NQO1	NAD(P)H dehydrogenase [quinone] 1	-1
M12	isorhamnetin-3-O-β-rutinoside_qt	P18031	PTPN1	Tyrosine-protein phosphatase non-receptor type 1	-1
M12	isorhamnetin-3-O-β-rutinoside_qt	P18054	ALOX12	Arachidonate 12-lipoxygenase, 12S-type	-1
M12	isorhamnetin-3-O-β-rutinoside_qt	P21397	MAOA	Amine oxidase [flavin-containing] A	-1
M12	isorhamnetin-3-O-β-rutinoside_qt	P23219	PTGS1	Prostaglandin G/H synthase 1	-1
M12	isorhamnetin-3-O-β-rutinoside_qt	P24941	CDK2	Cell division protein kinase 2	-1
M12	isorhamnetin-3-O-β-rutinoside_qt	P27487	DPP4	Dipeptidyl peptidase 4	-1
M12	isorhamnetin-3-O-β-rutinoside_qt	P35228	NOS2	Nitric oxide synthase, inducible	-1
M12	isorhamnetin-3-O-β-rutinoside_qt	P35354	PTGS2	Prostaglandin G/H synthase 2	-1
M12	isorhamnetin-3-O-β-rutinoside_qt	P37058	HSD17B3	Estradiol 17-beta-dehydrogenase 3	-1
M12	isorhamnetin-3-O-β-rutinoside_qt	P37231	PPARG	Peroxisome proliferator-activated receptor gamma	1
M12	isorhamnetin-3-O-β-rutinoside_qt	P42336	PIK3CA	Phosphatidylinositol-4,5-bisphosphate 3-kinase catalytic subunit alpha isoform	-1
M12	isorhamnetin-3-O-β-rutinoside_qt	P48736	PIK3CG	Phosphatidylinositol-4,5-bisphosphate 3-kinase catalytic subunit gamma isoform	-1
M12	isorhamnetin-3-O-β-rutinoside_qt	P49841	GSK3B	Glycogen synthase kinase-3 beta	-1
M12	isorhamnetin-3-O-β-rutinoside_qt	P62158	CALM	Calmodulin	-1
M12	isorhamnetin-3-O-β-rutinoside_qt	P67870	CSNK2B	Casein kinase II subunit beta	-1
M12	isorhamnetin-3-O-β-rutinoside_qt	P68400	CSNK2A1	Casein kinase II subunit alpha	-1
M12	isorhamnetin-3-O-β-rutinoside_qt	Q04760	GLO1	Lactoylglutathione lyase	-1
M12	isorhamnetin-3-O-β-rutinoside_qt	Q14524	SCN5A	Sodium channel protein type 5 subunit alpha	-1
M12	isorhamnetin-3-O-β-rutinoside_qt	Q16539	MAPK14	Mitogen-activated protein kinase 14	-1
M12	isorhamnetin-3-O-β-rutinoside_qt	Q92731	ESR2	Estrogen receptor beta	1
M13	kaempferol-3-glucoside_qt	O14732	IMPA2	Inositol monophosphatase 2	-1
M13	kaempferol-3-glucoside_qt	O14757	CHEK1	Serine/threonine-protein kinase Chk1	-1
M13	kaempferol-3-glucoside_qt	P00918	CA2	Carbonic anhydrase 2	-1
M13	kaempferol-3-glucoside_qt	P03372	ESR1	Estrogen receptor	-1
M13	kaempferol-3-glucoside_qt	P07477	PRSS1	Trypsin-1	-1
M13	kaempferol-3-glucoside_qt	P07900	HSP90AA1	Heat shock protein HSP 90-alpha	-1
M13	kaempferol-3-glucoside_qt	P09917	ALOX5	Arachidonate 5-lipoxygenase	-1
M13	kaempferol-3-glucoside_qt	P10275	AR	Androgen receptor	-1
M13	kaempferol-3-glucoside_qt	P11309	PIM1	Proto-oncogene serine/threonine-protein kinase Pim-1	-1
M13	kaempferol-3-glucoside_qt	P11511	CYP19A1	Cytochrome P450 19A1	-1
M13	kaempferol-3-glucoside_qt	P14174	MIF	Macrophage migration inhibitory factor	-1
M13	kaempferol-3-glucoside_qt	P17612	PRKACA	cAMP-dependent protein kinase catalytic subunit alpha	-1
M13	kaempferol-3-glucoside_qt	P18031	PTPN1	Tyrosine-protein phosphatase non-receptor type 1	-1
M13	kaempferol-3-glucoside_qt	P18054	ALOX12	Arachidonate 12-lipoxygenase, 12S-type	-1
M13	kaempferol-3-glucoside_qt	P20248	CCNA2	Cyclin-A2	-1
M13	kaempferol-3-glucoside_qt	P21397	MAOA	Amine oxidase [flavin-containing] A	-1
M13	kaempferol-3-glucoside_qt	P23219	PTGS1	Prostaglandin G/H synthase 1	-1
M13	kaempferol-3-glucoside_qt	P24941	CDK2	Cell division protein kinase 2	-1
M13	kaempferol-3-glucoside_qt	P27338	MAOB	Amine oxidase [flavin-containing] B	-1
M13	kaempferol-3-glucoside_qt	P29218	IMPA1	Inositol monophosphatase	-1
M13	kaempferol-3-glucoside_qt	P35228	NOS2	Nitric oxide synthase, inducible	-1
M13	kaempferol-3-glucoside_qt	P35354	PTGS2	Prostaglandin G/H synthase 2	-1
M13	kaempferol-3-glucoside_qt	P37058	HSD17B3	Estradiol 17-beta-dehydrogenase 3	-1
M13	kaempferol-3-glucoside_qt	P37231	PPARG	Peroxisome proliferator-activated receptor gamma	1
M13	kaempferol-3-glucoside_qt	P42336	PIK3CA	Phosphatidylinositol-4,5-bisphosphate 3-kinase catalytic subunit alpha isoform	-1
M13	kaempferol-3-glucoside_qt	P48736	PIK3CG	Phosphatidylinositol-4,5-bisphosphate 3-kinase catalytic subunit gamma isoform	-1
M13	kaempferol-3-glucoside_qt	P49841	GSK3B	Glycogen synthase kinase-3 beta	-1
M13	kaempferol-3-glucoside_qt	P67870	CSNK2B	Casein kinase II subunit beta	-1
M13	kaempferol-3-glucoside_qt	P68400	CSNK2A1	Casein kinase II subunit alpha	-1
M13	kaempferol-3-glucoside_qt	Q04760	GLO1	Lactoylglutathione lyase	-1
M13	kaempferol-3-glucoside_qt	Q15596	NCOA2	Nuclear receptor coactivator 2	-1
M13	kaempferol-3-glucoside_qt	Q15788	NCOA1	Nuclear receptor coactivator 1	-1
M13	kaempferol-3-glucoside_qt	Q16539	MAPK14	Mitogen-activated protein kinase 14	-1
M13	kaempferol-3-glucoside_qt	Q92731	ESR2	Estrogen receptor beta	1
M14	phosphatide	P00918	CA2	Carbonic anhydrase 2	-1
M14	phosphatide	P02766	TTR	Transthyretin	-1
M14	phosphatide	P03372	ESR1	Estrogen receptor	1
M14	phosphatide	P06746	POLB	DNA polymerase beta	-1
M14	phosphatide	P08575	PTPRC	Receptor-type tyrosine-protein phosphatase C	-1
M14	phosphatide	P10275	AR	Androgen receptor	-1
M14	phosphatide	P11309	PIM1	Proto-oncogene serine/threonine-protein kinase Pim-1	-1
M14	phosphatide	P14902	IDO1	Indoleamine 2,3-dioxygenase 1	-1
M14	phosphatide	P18031	PTPN1	Tyrosine-protein phosphatase non-receptor type 1	-1
M14	phosphatide	P20248	CCNA2	Cyclin-A2	-1
M14	phosphatide	P23219	PTGS1	Prostaglandin G/H synthase 1	-1
M14	phosphatide	P35228	NOS2	Nitric oxide synthase, inducible	-1
M14	phosphatide	P35354	PTGS2	Prostaglandin G/H synthase 2	-1
M14	phosphatide	P37231	PPARG	Peroxisome proliferator-activated receptor gamma	1
M14	phosphatide	P48736	PIK3CG	Phosphatidylinositol-4,5-bisphosphate 3-kinase catalytic subunit gamma isoform	-1
M14	phosphatide	P49841	GSK3B	Glycogen synthase kinase-3 beta	-1
M14	phosphatide	Q06124	PTPN11	Tyrosine-protein phosphatase non-receptor type 11	-1
M14	phosphatide	Q15596	NCOA2	Nuclear receptor coactivator 2	-1
M14	phosphatide	Q16539	MAPK14	Mitogen-activated protein kinase 14	-1
M14	phosphatide	Q92731	ESR2	Estrogen receptor beta	1
M15	vitamin K	P07900	HSP90AA1	Heat shock protein HSP 90-alpha	-1
M15	vitamin K	P08253	MMP2	72 kDa type IV collagenase	-1
M15	vitamin K	P08575	PTPRC	Receptor-type tyrosine-protein phosphatase C	-1
M15	vitamin K	P16581	SELE	E-selectin	-1
M15	vitamin K	P16671	CD36	Platelet glycoprotein 4	-1
M15	vitamin K	P19320	VCAM1	Vascular cell adhesion protein 1	-1
M15	vitamin K	P27695	APEX1	DNA-(apurinic or apyrimidinic site) lyase	-1
M15	vitamin K	P78380	OLR1	Oxidized low-density lipoprotein receptor 1	-1
M16	vitamin P_qt	P03372	ESR1	Estrogen receptor	-1
M16	vitamin P_qt	P03886	ND1	NADH-ubiquinone oxidoreductase chain 1	-1
M16	vitamin P_qt	P03891	ND2	NADH-ubiquinone oxidoreductase chain 2	-1
M16	vitamin P_qt	P03897	ND3	NADH-ubiquinone oxidoreductase chain 3	-1
M16	vitamin P_qt	P03901	ND4L	NADH-ubiquinone oxidoreductase chain 4L	-1
M16	vitamin P_qt	P03905	ND4	NADH-ubiquinone oxidoreductase chain 4	-1
M16	vitamin P_qt	P03915	ND5	NADH-ubiquinone oxidoreductase chain 5	-1
M16	vitamin P_qt	P03923	ND6	NADH-ubiquinone oxidoreductase chain 6	-1
M16	vitamin P_qt	P05362	ICAM1	Intercellular adhesion molecule 1	-1
M16	vitamin P_qt	P07900	HSP90AA1	Heat shock protein HSP 90-alpha	-1
M16	vitamin P_qt	P10275	AR	Androgen receptor	-1
M16	vitamin P_qt	P11309	PIM1	Proto-oncogene serine/threonine-protein kinase Pim-1	-1
M16	vitamin P_qt	P18031	PTPN1	Tyrosine-protein phosphatase non-receptor type 1	-1
M16	vitamin P_qt	P19320	VCAM1	Vascular cell adhesion protein 1	-1
M16	vitamin P_qt	P20248	CCNA2	Cyclin-A2	-1
M16	vitamin P_qt	P21397	MAOA	Amine oxidase [flavin-containing] A	-1
M16	vitamin P_qt	P23219	PTGS1	Prostaglandin G/H synthase 1	-1
M16	vitamin P_qt	P24941	CDK2	Cell division protein kinase 2	-1
M16	vitamin P_qt	P27338	MAOB	Amine oxidase [flavin-containing] B	-1
M16	vitamin P_qt	P35228	NOS2	Nitric oxide synthase, inducible	-1
M16	vitamin P_qt	P35354	PTGS2	Prostaglandin G/H synthase 2	-1
M16	vitamin P_qt	P37231	PPARG	Peroxisome proliferator-activated receptor gamma	1
M16	vitamin P_qt	P42574	CASP3	Caspase-3	-1
M16	vitamin P_qt	P48736	PIK3CG	Phosphatidylinositol-4,5-bisphosphate 3-kinase catalytic subunit gamma isoform	-1
M16	vitamin P_qt	Q07812	BAX	Apoptosis regulator BAX	-1
M16	vitamin P_qt	Q08493	PDE4C	cAMP-specific 3',5'-cyclic phosphodiesterase 4C	-1
M16	vitamin P_qt	Q08499	PDE4D	cAMP-specific 3',5'-cyclic phosphodiesterase 4D	-1
M16	vitamin P_qt	Q15596	NCOA2	Nuclear receptor coactivator 2	-1
M16	vitamin P_qt	Q16539	MAPK14	Mitogen-activated protein kinase 14	-1
M16	vitamin P_qt	Q8IVF5	TIAM2	T-lymphoma invasion and metastasis-inducing protein 2	-1
M16	vitamin P_qt	Q92731	ESR2	Estrogen receptor beta	1
M16	vitamin P_qt	Q9H4B7	TUBB1	Tubulin beta-1 chain	-1
M17	Qercetin-3-O-galactoside_qt	O14746	TERT	Telomerase reverse transcriptase	-1
M17	Qercetin-3-O-galactoside_qt	P00441	SOD1	Superoxide dismutase [Cu-Zn]	-1
M17	Qercetin-3-O-galactoside_qt	P00533	EGFR	Epidermal growth factor receptor	-1
M17	Qercetin-3-O-galactoside_qt	P00918	CA2	Carbonic anhydrase 2	-1
M17	Qercetin-3-O-galactoside_qt	P03372	ESR1	Estrogen receptor	1
M17	Qercetin-3-O-galactoside_qt	P04040	CAT	Catalase	-1
M17	Qercetin-3-O-galactoside_qt	P07900	HSP90AA1	Heat shock protein HSP 90-alpha	-1
M17	Qercetin-3-O-galactoside_qt	P09917	ALOX5	Arachidonate 5-lipoxygenase	-1
M17	Qercetin-3-O-galactoside_qt	P10275	AR	Androgen receptor	-1
M17	Qercetin-3-O-galactoside_qt	P11309	PIM1	Proto-oncogene serine/threonine-protein kinase Pim-1	-1
M17	Qercetin-3-O-galactoside_qt	P11511	CYP19A1	Cytochrome P450 19A1	-1
M17	Qercetin-3-O-galactoside_qt	P14174	MIF	Macrophage migration inhibitory factor	-1
M17	Qercetin-3-O-galactoside_qt	P15121	AKR1B1	Aldose reductase	-1
M17	Qercetin-3-O-galactoside_qt	P18031	PTPN1	Tyrosine-protein phosphatase non-receptor type 1	-1
M17	Qercetin-3-O-galactoside_qt	P18054	ALOX12	Arachidonate 12-lipoxygenase, 12S-type	-1
M17	Qercetin-3-O-galactoside_qt	P20248	CCNA2	Cyclin-A2	-1
M17	Qercetin-3-O-galactoside_qt	P21397	MAOA	Amine oxidase [flavin-containing] A	-1
M17	Qercetin-3-O-galactoside_qt	P21917	DRD4	D(4) dopamine receptor	1
M17	Qercetin-3-O-galactoside_qt	P23219	PTGS1	Prostaglandin G/H synthase 1	-1
M17	Qercetin-3-O-galactoside_qt	P24941	CDK2	Cell division protein kinase 2	-1
M17	Qercetin-3-O-galactoside_qt	P27487	DPP4	Dipeptidyl peptidase 4	-1
M17	Qercetin-3-O-galactoside_qt	P35354	PTGS2	Prostaglandin G/H synthase 2	-1
M17	Qercetin-3-O-galactoside_qt	P37058	HSD17B3	Estradiol 17-beta-dehydrogenase 3	-1
M17	Qercetin-3-O-galactoside_qt	P37231	PPARG	Peroxisome proliferator-activated receptor gamma	1
M17	Qercetin-3-O-galactoside_qt	P42336	PIK3CA	Phosphatidylinositol-4,5-bisphosphate 3-kinase catalytic subunit alpha isoform	-1
M17	Qercetin-3-O-galactoside_qt	P42574	CASP3	Caspase-3	-1
M17	Qercetin-3-O-galactoside_qt	P48736	PIK3CG	Phosphatidylinositol-4,5-bisphosphate 3-kinase catalytic subunit gamma isoform	-1
M17	Qercetin-3-O-galactoside_qt	P49841	GSK3B	Glycogen synthase kinase-3 beta	-1
M17	Qercetin-3-O-galactoside_qt	P67870	CSNK2B	Casein kinase II subunit beta	-1
M17	Qercetin-3-O-galactoside_qt	P68400	CSNK2A1	Casein kinase II subunit alpha	-1
M17	Qercetin-3-O-galactoside_qt	Q04760	GLO1	Lactoylglutathione lyase	-1
M17	Qercetin-3-O-galactoside_qt	Q07812	BAX	Apoptosis regulator BAX	-1
M17	Qercetin-3-O-galactoside_qt	Q15596	NCOA2	Nuclear receptor coactivator 2	-1
M17	Qercetin-3-O-galactoside_qt	Q16539	MAPK14	Mitogen-activated protein kinase 14	-1
M17	Qercetin-3-O-galactoside_qt	Q92731	ESR2	Estrogen receptor beta	1
M17	Qercetin-3-O-galactoside_qt	Q96EB6	SIRT1	NAD-dependent protein deacetylase sirtuin-1	-1
M18	(-)-epicatechin	P03372	ESR1	Estrogen receptor	1
M18	(-)-epicatechin	P11309	PIM1	Proto-oncogene serine/threonine-protein kinase Pim-1	-1
M18	(-)-epicatechin	P11388	TOP2A	DNA topoisomerase 2-alpha	-1
M18	(-)-epicatechin	P18054	ALOX12	Arachidonate 12-lipoxygenase, 12S-type	-1
M18	(-)-epicatechin	P43166	CA7	Carbonic anhydrase 7	-1
M18	(-)-epicatechin	Q92731	ESR2	Estrogen receptor beta	1
M01	kaempferol	O43242	PSMD3	26S proteasome non-ATPase regulatory subunit 3	-1
M01	kaempferol	O95433	AHSA1	Activator of 90 kDa heat shock protein ATPase homolog 1	-1
M01	kaempferol	P00918	CA2	Carbonic anhydrase 2	-1
M01	kaempferol	P14174	MIF	Macrophage migration inhibitory factor	-1
M01	kaempferol	P29218	IMPA1	Inositol monophosphatase	-1
M01	kaempferol	P31749	AKT1	RAC-alpha serine/threonine-protein kinase	-1
M01	kaempferol	P62158	CALM	Calmodulin	-1
M01	kaempferol	Q04760	GLO1	Lactoylglutathione lyase	-1
M01	kaempferol	Q08209	PPP3CA	Serine/threonine-protein phosphatase 2B catalytic subunit alpha isoform	-1
M02	quercetin	P00918	CA2	Carbonic anhydrase 2	-1
M02	quercetin	P14174	MIF	Macrophage migration inhibitory factor	-1
M02	quercetin	P62158	CALM	Calmodulin	-1
M02	quercetin	Q04760	GLO1	Lactoylglutathione lyase	1
M04	rutin_qt	P00441	SOD1	Superoxide dismutase [Cu-Zn]	-1
M04	rutin_qt	P05771	PRKCB	Protein kinase C beta type	-1
M04	rutin_qt	P14174	MIF	Macrophage migration inhibitory factor	-1
M04	rutin_qt	P61925	PKIA	cAMP-dependent protein kinase inhibitor alpha	-1
M04	rutin_qt	Q04760	GLO1	Lactoylglutathione lyase	-1
M02	quercetin	O43242	PSMD3	26S proteasome non-ATPase regulatory subunit 3	-1
M02	quercetin	O95433	AHSA1	Activator of 90 kDa heat shock protein ATPase homolog 1	-1
M02	quercetin	P00441	SOD1	Superoxide dismutase [Cu-Zn]	-1
M02	quercetin	P05771	PRKCB	Protein kinase C beta type	-1
M02	quercetin	P09874	PARP1	Poly [ADP-ribose] polymerase 1	-1
M02	quercetin	P10451	SPP1	Osteopontin	-1
M02	quercetin	P17302	GJA1	Gap junction alpha-1 protein	-1
M02	quercetin	P17612	PRKACA	cAMP-dependent protein kinase catalytic subunit alpha	-1
M02	quercetin	P20936	RASA1	Ras GTPase-activating protein 1	-1
M02	quercetin	P31749	AKT1	RAC-alpha serine/threonine-protein kinase	-1
M02	quercetin	P55786	NPEPPS	Puromycin-sensitive aminopeptidase	-1
M02	quercetin	Q13085	ACACA	Acetyl-CoA carboxylase 1	-1
M15	vitamin K	P10451	SPP1	Osteopontin	-1
M16	vitamin P_qt	P00918	CA2	Carbonic anhydrase 2	-1
M16	vitamin P_qt	P27815	PDE4A	cAMP-specific 3',5'-cyclic phosphodiesterase 4A	-1
M16	vitamin P_qt	Q07343	PDE4B	cAMP-specific 3',5'-cyclic phosphodiesterase 4B	-1
M18	(-)-epicatechin	P00918	CA2	Carbonic anhydrase 2	-1
