# Supplementary material for: Systems Pharmacology Dissecting Holistic Medicine for Treatment of Complex Diseases: An Example Using Cardiocerebrovascular Diseases Treated by TCM
Source: Evid Based Complement Alternat Med. 2015 May 26;2015:980190. doi: 10.1155/2015/980190 (PMC4460250; doi:10.1155/2015/980190)
Supplement: Supplementary file 1 — Table S1 shows the structure information of 367 compounds in Xinnaoxin Pill. Table S2 and Table S3 respectively represents the information for construction PreHIA and PreAM model. Table S4 displays the detailed information of compound-target interactions. And Table S5 shows the information of the 218 targets in this study. Figure S1 and Figure S2 reveal the workflow for PreHIA and PreAM. [file 980190.f1.zip › mat.980190.v2/Table S5.xls]

## Sheet: Sheet1
Table S5. The information of the 218 Targets (*: no mRNA level information)
Gene Name	UniProt ID	Target Name	Heart mRNA level	Kidney mRNA level	Thymus mRNA level	Whole blood mRNA level	Whole brain mRNA level	Average mRNA level in different tissues
CLDN4	O14493	Claudin-4	11.4	6.5	6.1	8.35	5.5	14.9777
CXCL11	O14625	C-X-C motif chemokine 11	12.6	6.85	5.3	7.8	5.6	7.56869
IMPA2	O14732	Inositol monophosphatase 2	33.55	587.6	4.8	342.9	3.95	54.0693
TERT	O14746	Telomerase reverse transcriptase	97.4	43.6	43.6	52.6	45.7	56.446
CHEK1	O14757	Serine/threonine-protein kinase Chk1	32.35	15.3	13.45	16.5	10.85	24.7201
IKBKB	O14920	Inhibitor of nuclear factor kappa-B kinase subunit beta	15.85	13.4	46.2	88.75	13.65	46.2325
CHUK	O15111	Inhibitor of nuclear factor kappa-B kinase subunit alpha	16.3	8.85	8.1	32.95	7.05	13.3671
BIRC5	O15392	Baculoviral IAP repeat-containing protein 5	3.4	2.2	2.25	2.95	2.4	3.94887
PSMD3	O43242	26S proteasome non-ATPase regulatory subunit 3	161.15	45.9	122.45	59.85	211.2	92.9997
MGAM	O43451	Maltase-glucoamylase, intestinal	18.4	14.05	6.65	901.95	7.05	24.2966
NR1I2	O75469	Nuclear receptor subfamily 1 group I member 2	6.9	4.15	3.8	5.2	3.95	5.74911
AHSA1	O95433	Activator of 90 kDa heat shock protein ATPase homolog 1	99.35	58.05	130	82.15	392.55	160.619
GGPS1	O95749	Geranylgeranyl pyrophosphate synthetase	7.9	5.2	4.35	6.2	4.65	6.09702
CHEK2	O96017	Serine/threonine-protein kinase Chk2	4.2	2.7	2.6	3.75	2.85	3.47565
SOD1	P00441	Superoxide dismutase [Cu-Zn]	1097	1267.7	900.1	678.85	3935.95	1633.03
EGFR	P00533	Epidermal growth factor receptor	5.1	35.85	141.65	4.1	16.95	84.8361
F2	P00734	Prothrombin	5.15	3.25	3.25	4.45	3.3	54.9734
PLAU	P00749	Urokinase-type plasminogen activator	6.25	69.1	3.85	5.15	3.9	16.5205
PLAT	P00750	Tissue-type plasminogen activator	13.95	113.35	20.9	9.75	15.1	50.4961
CA2	P00918	Carbonic anhydrase 2	8	259.9	4.65	147.8	405	268.185
FOS	P01100	Proto-oncogene protein c-fos	8.65	243.55	329.95	248.25	79.25	414.02
MYC	P01106	Myc proto-oncogene protein	90.8	62.25	203.4	91.3	28.7	238.175
EGF	P01133	Pro-epidermal growth factor	6.85	141.55	3.85	6.1	4.15	7.1703
TGFB1	P01137	Transforming growth factor beta-1	8.95	5.6	4.85	6.9	5.05	6.7206
INS	P01308	Insulin	6.7	4.25	3.75	5.25	4	307.075
IGF2	P01344	Insulin-like growth factor II	309.2	16	10.7	5.85	17.55	449.374
TNF	P01375	Tumor necrosis factor	3.85	2.5	2.5	3.5	2.65	4.43756
IFNG	P01579	Interferon gamma	7.75	4.1	3.75	5.45	4.1	5.38899
IL1A	P01583	Interleukin-1 alpha	5.1	3.15	3.2	4.35	3.35	4.1056
IL1B	P01584	Interleukin-1 beta	5.8	3.8	3.35	201.15	3.65	91.6821
IGHG1	P01857	Ig gamma-1 chain C region	5977.9	164.95	8540.75	235.65	5.1	1484.66
COL1A1	P02452	Collagen alpha-1(I) chain	7.25	5.9	140.5	5.2	3.95	501.127
COL3A1	P02461	Collagen alpha-1(III) chain	204.5	61.3	370.3	13.55	9.5	868.812
CRP	P02741	C-reactive protein	4.05	2.55	2.55	3.55	2.75	4.46393
TTR	P02766	Transthyretin	7.85	4.15	5.1	13.75	1571.2	1406.54
CXCL10	P02778	Small inducible cytokine B10	12.4	15.1	13.7	11.2	8.65	17.0373
ESR1	P03372	Estrogen receptor	5.15	3.25	3.1	4.3	3.35	13.6468
ND1	P03886	NADH-ubiquinone oxidoreductase chain 1	*	*	*	*	*	*
ND2	P03891	NADH-ubiquinone oxidoreductase chain 2	*	*	*	*	*	*
ND3	P03897	NADH-ubiquinone oxidoreductase chain 3	*	*	*	*	*	*
ND4L	P03901	NADH-ubiquinone oxidoreductase chain 4L	*	*	*	*	*	*
ND4	P03905	NADH-ubiquinone oxidoreductase chain 4	*	*	*	*	*	*
ND5	P03915	NADH-ubiquinone oxidoreductase chain 5	*	*	*	*	*	*
ND6	P03923	NADH-ubiquinone oxidoreductase chain 6	*	*	*	*	*	*
MMP1	P03956	Interstitial collagenase	8.4	5.2	4.5	6.35	4.7	172.453
SLPI	P03973	Antileukoproteinase	23.4	19	345.2	107.9	11.55	388.204
HMGCR	P04035	3-hydroxy-3-methylglutaryl-coenzyme A reductase	11.55	7.05	4.9	27.85	10.1	25.0267
CAT	P04040	Catalase	45.25	1068.45	270.8	1397.55	91.5	497.367
RAF1	P04049	RAF proto-oncogene serine/threonine-protein kinase	140.6	71.75	175.9	892.7	65.85	136.85
ERBB2	P04626	Receptor tyrosine-protein kinase erbB-2	4.45	2.95	2.75	3.85	2.95	3.50214
TP53	P04637	Cellular tumor antigen p53	8.9	4.9	40.2	50.55	4.6	20.5342
HSPB1	P04792	Heat shock protein beta-1	5293.7	251.4	648.7	21.3	202.25	710.412
CYP1A1	P04798	Cytochrome P450 1A1	5.6	3.5	3.55	4.6	3.55	24.2477
APP	P05067	Amyloid beta A4 protein	36.15	251.75	83.2	55.95	582.85	298.215
ITGB2	P05107	Integrin beta-2	37.6	5.1	234.3	2694.1	5.55	220.113
SERPINE1	P05121	Plasminogen activator inhibitor 1	7.65	4.8	5.45	5.9	4.3	177.799
MPO	P05164	Myeloperoxidase	5	3.15	3.15	4.5	3.25	115.66
CYP1A2	P05177	Cytochrome P450 1A2	5.8	3.75	3.6	4.8	3.8	62.5145
IL6	P05231	Interleukin-6	6.45	4	9.3	5.4	4.2	43.0358
ICAM1	P05362	Intercellular adhesion molecule 1	77	34.1	44.9	60.25	27.8	59.7092
JUN	P05412	Transcription factor AP-1	266.65	97	294.45	19.7	163.4	270.677
PRKCB	P05771	Protein kinase C beta type	9.25	5.9	26.8	288.3	483.15	167.427
INSR	P06213	Insulin receptor	14.7	15.35	7.15	9.5	9.4	11.8424
RB1	P06400	Retinoblastoma-associated protein	25.05	15.95	16.8	38.15	14.55	28.5998
CDK1	P06493	Cell division control protein 2 homolog	21.7	9.3	21.65	10.45	7.1	95.0714
FCER2	P06734	Low affinity immunoglobulin epsilon Fc receptor	6.6	3.9	3.65	5.05	3.7	17.8759
POLB	P06746	DNA polymerase beta	26.1	17.6	33.5	74.4	39.9	53.6467
THBD	P07204	Thrombomodulin	8.8	5	10.9	60.3	4.3	17.5998
CTSD	P07339	Cathepsin D	501.5	62.5	36	156.7	76.55	149.381
PRSS1	P07477	Trypsin-1	20.9	10.45	8.7	12.4	9.4	566.289
HSP90AA1	P07900	Heat shock protein HSP 90-alpha	11	226.3	583.1	1196.7	967.85	1825.38
MMP2	P08253	72 kDa type IV collagenase	80.15	11.1	28.75	9.05	8.85	167.461
SOD3	P08294	Extracellular superoxide dismutase [Cu-Zn]	12.15	12	4.85	6.2	4.7	14.0989
PTPRC	P08575	Receptor-type tyrosine-protein phosphatase C	17.35	10.55	31	1785.55	9.55	149.525
CYP3A4	P08684	Cytochrome P450 3A4	6.15	5.4	5.3	5.1	5.1	7.72815
F7	P08709	Coagulation factor VII	4.95	3.05	3	4.2	3.25	7.09845
GSTP1	P09211	Glutathione S-transferase P	883.95	285.55	410.9	349.3	173.15	336.937
GSTM1	P09488	Glutathione S-transferase Mu 1	73.05	39.95	30.9	26.15	55.3	70.0736
HMOX1	P09601	Heme oxygenase 1	97.9	3.2	3.15	59.4	3.2	13.3361
PARP1	P09874	Poly [ADP-ribose] polymerase 1	67.95	53.55	182.05	105.45	196.1	189.36
ALOX5	P09917	Arachidonate 5-lipoxygenase	9.9	5.45	4.65	39.95	5.4	9.12065
IL8	P10145	Interleukin-8	12.55	8	8.75	463.15	6.9	247.889
AR	P10275	Androgen receptor	5.2	3.25	3.15	4.3	3.35	4.33036
BCL2	P10415	Apoptosis regulator Bcl-2	6.95	4.55	4.2	5.85	4.45	5.56268
SPP1	P10451	Osteopontin	9.25	1288.45	5.35	7.85	314.2	309.952
IRF1	P10914	Interferon regulatory factor 1	33.6	6.15	68.25	1569.25	5.95	72.8457
HSPA5	P11021	78 kDa glucose-regulated protein	319.7	438.45	653.45	841.4	632.65	1261.15
PIM1	P11309	Proto-oncogene serine/threonine-protein kinase Pim-1	8.25	4.6	14.2	151.5	4.8	52.0933
TOP1	P11387	DNA topoisomerase 1	14.65	7	20.65	8.3	7.95	75.5305
TOP2A	P11388	DNA topoisomerase 2-alpha	19.95	8.65	40.2	9.5	6.8	84.7503
CYP19A1	P11511	Cytochrome P450 19A1	8.5	5.3	4.75	6.7	5.05	65.1408
ODC1	P11926	Ornithine decarboxylase	33.25	84.65	200.25	200.5	71.65	329.947
BMP2	P12643	Bone morphogenetic protein 2	11.9	7.2	5.85	8.1	6.5	8.7581
CCL2	P13500	Small inducible cytokine A2	25.35	27.4	33.55	14.95	11.55	151.254
RARG	P13631	Retinoic acid receptor gamma-1	9	14.75	4.8	6.35	5.2	7.38071
F3	P13726	Tissue factor	29.35	16.75	14.75	19.25	47	88.3182
MIF	P14174	Macrophage migration inhibitory factor	1845.75	1294.85	1168.1	337.85	2247.35	939.333
NCF1	P14598	Neutrophil cytosol factor 1	35.95	2.15	2.15	1556.9	2.35	69.2768
CCNB1	P14635	G2/mitotic-specific cyclin-B1	5.85	3.65	60.1	4.65	3.9	26.7162
SLC2A4	P14672	Solute carrier family 2, facilitated glucose transporter member 4	9.8	6.4	5.4	7.45	5.75	7.09619
MMP9	P14780	Matrix metalloproteinase-9	14.75	3.65	52.3	107.45	3.95	15.7963
IDO1	P14902	Indoleamine 2,3-dioxygenase 1	11.55	5.75	7.1	7.8	4.45	6.88946
AKR1B1	P15121	Aldose reductase	1310.85	695.3	442.25	249.45	622.2	727.401
ACPP	P15309	Prostatic acid phosphatase	8.5	5.35	4.85	6.95	5.1	157.98
NQO1	P15559	NAD(P)H dehydrogenase [quinone] 1	7.4	6.45	4.25	5.75	4.7	11.5628
VEGFA	P15692	Vascular endothelial growth factor A	83	98.6	12.85	8.55	48.65	95.2858
POR	P16435	NADPH--cytochrome P450 reductase	12.9	18.55	26.75	28.6	19.5	50.5327
SELE	P16581	E-selectin	15.55	8.6	6	8.65	6.4	9.64708
CD36	P16671	Platelet glycoprotein 4	9.8	5.5	5.3	178.25	4.9	74.1307
PRKCA	P17252	Protein kinase C alpha type	7.2	4.5	4.1	5.8	4.5	5.33762
GJA1	P17302	Gap junction alpha-1 protein	53.55	9.05	42.65	8.3	815.55	454.395
PRKACA	P17612	cAMP-dependent protein kinase catalytic subunit alpha	641	65.6	84.65	187.6	151.35	120.566
IGFBP3	P17936	Insulin-like growth factor-binding protein 3	44.1	39.15	24.95	12.2	12.45	261.124
PTPN1	P18031	Tyrosine-protein phosphatase non-receptor type 1	4.65	3	5.3	6	3.2	10.739
ALOX12	P18054	Arachidonate 12-lipoxygenase, 12S-type	5.7	3.2	3	29.05	3.25	4.22637
SRD5A1	P18405	3-oxo-5-alpha-steroid 4-dehydrogenase 1	8.5	4.7	4.3	6.25	45.2	13.8653
VCAM1	P19320	Vascular cell adhesion protein 1	176.8	35.65	85.5	12.05	9.45	59.7611
ELK1	P19419	ETS domain-containing protein Elk-1	391.1	319.95	247.95	220.8	402.9	411.414
RXRA	P19793	Retinoic acid receptor RXR-alpha	15.8	7.55	5.15	80.65	6.95	13.779
CXCL2	P19875	C-X-C motif chemokine 2	14.65	8.35	7.4	9.65	7	75.4512
CCNA2	P20248	Cyclin-A2	8.3	5.05	33.65	6.5	5.05	22.0224
RASA1	P20936	Ras GTPase-activating protein 1	43.4	27.15	49.75	139.9	154.6	140.776
MAOA	P21397	Amine oxidase [flavin-containing] A	30.6	60	12.85	14.6	11.5	38.8033
C5AR1	P21730	C5a anaphylatoxin chemotactic receptor 1	20.6	10.05	7.95	3347.1	6.9	81.9389
TBXA2R	P21731	Thromboxane A2 receptor	17.35	22.75	13.7	14	8.9	22.2557
ERBB3	P21860	Receptor tyrosine-protein kinase erbB-3	8.2	64.6	4.55	5.9	12	24.876
DRD4	P21917	D(4) dopamine receptor	5	2.25	2.25	3.15	2.45	3.45536
IL10	P22301	Interleukin-10	10.4	6.65	5.2	7.45	5.55	7.37798
MMP8	P22894	Neutrophil collagenase	7.2	4.4	4	5.7	4.45	13.9521
PTGS1	P23219	Prostaglandin G/H synthase 1	4.6	2.7	2.7	3.8	2.9	6.09119
CCND1	P24385	G1/S-specific cyclin-D1	9.75	5.5	5.15	7.05	5.65	20.0975
CDK2	P24941	Cell division protein kinase 2	9.55	8.05	82.6	8.65	5.15	19.0751
NFKBIA	P25963	NF-kappa-B inhibitor alpha	523.5	304.25	1151.4	1428.55	273.3	1005.26
PON1	P27169	Serum paraoxonase/arylesterase 1	12.75	6.7	5.6	7.95	6.05	7.69304
MAOB	P27338	Amine oxidase [flavin-containing] B	23.9	33.85	7.8	10.65	15.4	26.1649
DPP4	P27487	Dipeptidyl peptidase 4	19.65	28.45	5.95	8.25	6.3	21.6087
APEX1	P27695	DNA-(apurinic or apyrimidinic site) lyase	154.35	95.3	228.6	182.2	114.95	213.709
PDE4A	P27815	cAMP-specific 3',5'-cyclic phosphodiesterase 4A	6.45	3.9	3.9	5.85	45.2	13.3767
GSTM2	P28161	Glutathione S-transferase Mu 2	360.1	139.4	121.4	69.35	200.9	233.58
MAPK1	P28482	Mitogen-activated protein kinase 1	9.5	6	5.95	19.05	8.85	11.5055
IMPA1	P29218	Inositol monophosphatase	14.15	16.75	29.05	63.4	86.95	81.1968
NOS3	P29474	Nitric-oxide synthase, endothelial	8.5	3.1	3.05	4.2	3.25	3.98173
CD40LG	P29965	CD40 ligand	4.45	2.8	2.75	4.2	2.95	3.58107
CDC25A	P30304	M-phase inducer phosphatase 1	5.75	3.75	3.85	4.85	3.7	6.94833
SRD5A2	P31213	3-oxo-5-alpha-steroid 4-dehydrogenase 2	11.6	10.6	6.75	9.5	7.3	9.32065
AKT1	P31749	RAC-alpha serine/threonine-protein kinase	110.6	17.25	22.25	100.45	40.6	39.7424
NOS2	P35228	Nitric oxide synthase, inducible	4.9	3.1	3.05	4.2	3.35	3.85946
PTGS2	P35354	Prostaglandin G/H synthase 2	11.3	6.2	5.25	121.95	5.85	40.9812
AHR	P35869	Aryl hydrocarbon receptor	43.5	13.45	13.9	32.15	10.85	41.9307
HSD17B3	P37058	Estradiol 17-beta-dehydrogenase 3	6.45	4.1	3.95	5.5	4.3	6.82649
PPARG	P37231	Peroxisome proliferator-activated receptor gamma	5.45	3.45	3.25	4.55	3.5	6.8475
CDKN1A	P38936	Cyclin-dependent kinase inhibitor 1	250.7	49.55	128.2	85.6	25.5	197.333
STAT1	P42224	Signal transducer and activator of transcription 1-alpha/beta	8.15	7.75	179.6	650.35	22.15	121.411
AKR1C3	P42330	Aldo-keto reductase family 1 member C3	11.05	267.35	82.8	7.15	4.7	114.62
PIK3CA	P42336	Phosphatidylinositol-4,5-bisphosphate 3-kinase catalytic subunit alpha isoform	9.55	5.85	5.25	10.05	5.4	9.90369
CASP3	P42574	Caspase-3	12.65	7.95	8.4	29.6	8.05	14.7858
CDKN2A	P42771	Cyclin-dependent kinase inhibitor 2A, isoforms 1/2/3	6.7	4.25	3.95	5.55	4.2	5.16155
PTGER3	P43115	Prostaglandin E2 receptor, EP3 subtype	20.25	11.25	7.75	10.55	7.6	11.1292
CA7	P43166	Carbonic anhydrase 7	7.85	3.65	3.95	4.6	5	5.77006
MMP13	P45452	Collagenase 3	8.65	5.2	4.55	6.45	4.8	6.0647
MAPK8	P45983	Mitogen-activated protein kinase 8	5.35	3.5	3.4	4.7	3.6	4.41054
XDH	P47989	Xanthine dehydrogenase/oxidase	29.05	25.55	13.15	17.1	14.6	16.3048
PIK3CG	P48736	Phosphatidylinositol-4,5-bisphosphate 3-kinase catalytic subunit gamma isoform	6.05	4	3.5	11.25	3.75	5.29827
GSK3B	P49841	Glycogen synthase kinase-3 beta	18.45	11.8	27.45	42.35	15.1	19.1351
SULT1E1	P49888	Estrogen sulfotransferase	10.95	6.1	5.65	7.85	6	10.8168
DIO1	P49895	Type I iodothyronine deiodinase	6.75	265.35	3.9	5.3	4.1	34.037
HK2	P52789	Hexokinase-2	10.5	6.45	5.95	103.05	5.85	38.6427
CASP9	P55211	Caspase-9	36.35	24.65	41.9	45.05	32.15	43.8101
NPEPPS	P55786	Puromycin-sensitive aminopeptidase	14.5	24.75	40.6	37.9	92.3	63.0348
EIF6	P56537	Eukaryotic translation initiation factor 6	261.65	132.95	192.2	145.6	130.1	161.174
PTEN	P60484	Phosphatidylinositol 3,4,5-trisphosphate 3-phosphatase and dual-specificity protein phosphatase PTEN	9.7	8.4	20	626.45	8.55	58.8009
IL2	P60568	Interleukin-2	23.45	5.85	4.85	7.05	5.1	6.94399
PKIA	P61925	cAMP-dependent protein kinase inhibitor alpha	38.15	15.95	47.85	24.3	133.95	63.1648
CALM	P62158	Calmodulin	287.3	59.1	195.6	282.45	953.4	223.837
CSNK2B	P67870	Casein kinase II subunit beta	962.55	470.5	1007.6	879.1	521.3	574.895
CSNK2A1	P68400	Casein kinase II subunit alpha	7.85	6.05	6.85	7.05	8	9.67369
OLR1	P78380	Oxidized low-density lipoprotein receptor 1	12.1	6.65	6.05	8.55	6.3	8.09089
HSF1	Q00613	Heat shock factor protein 1	63.25	8.4	8.6	11.6	9.05	12.5056
E2F1	Q01094	Transcription factor E2F1	4.7	2.95	2.85	4	3.15	4.24756
CAV1	Q03135	Caveolin-1	24.45	3.4	42.3	4.4	3.4	72.1623
PPARD	Q03181	Peroxisome proliferator-activated receptor delta	27.25	17.1	14	18.65	18.05	21.815
RELA	Q04206	Transcription factor p65	126.6	48.95	111.05	160.1	41.3	66.0581
GLO1	Q04760	Lactoylglutathione lyase	21	102.2	114.6	104.2	363.6	346.817
PTPN11	Q06124	Tyrosine-protein phosphatase non-receptor type 11	8.35	5.1	4.6	6.35	4.8	6.34464
RUNX1T1	Q06455	Protein CBFA2T1	16.15	8.25	6.7	9.55	9.1	13.3158
PDE4B	Q07343	cAMP-specific 3',5'-cyclic phosphodiesterase 4B	26.75	24.8	18.4	312.55	198.2	94.4656
BAX	Q07812	Apoptosis regulator BAX	42.25	20.55	25.9	54.8	15.1	31.1949
BCL2L1	Q07817	Apoptosis regulator Bcl-X	29.85	9.4	18.25	10.25	9.55	16.9314
MCL1	Q07820	Induced myeloid leukemia cell differentiation protein Mcl-1	7.1	4.45	4.2	144.8	4.45	26.469
PPARA	Q07869	Peroxisome proliferator-activated receptor alpha	8.75	5.3	4.55	6.6	4.9	6.20024
PPP3CA	Q08209	Serine/threonine-protein phosphatase 2B catalytic subunit alpha isoform	18.7	11.95	15.35	85.95	207.6	134.099
PDE4C	Q08493	cAMP-specific 3',5'-cyclic phosphodiesterase 4C	7.85	6.45	4.7	6.85	5.4	6.21851
PDE4D	Q08499	cAMP-specific 3',5'-cyclic phosphodiesterase 4D	11.45	11.95	6.15	11.85	8.9	14.7132
ACACA	Q13085	Acetyl-CoA carboxylase 1	38.05	25.8	26	24.65	52	39.8292
RUNX2	Q13950	Runt-related transcription factor 2	5.35	3.6	3.3	4.6	3.4	4.23375
E2F2	Q14209	Transcription factor E2F2	9.55	4.35	3.75	5.1	4.05	5.09548
PDE3A	Q14432	cGMP-inhibited 3',5'-cyclic phosphodiesterase A	5.95	3.8	3.6	5.2	3.85	4.80524
SCN5A	Q14524	Sodium channel protein type 5 subunit alpha	38.45	3.75	3.7	5.25	3.95	5.25161
CASP8	Q14790	Caspase-8	4.35	2.75	2.7	16.95	2.8	6.27452
NR1I3	Q14994	Nuclear receptor subfamily 1 group I member 3	6.6	3.9	3.9	5.3	4.2	6.02304
PCOLCE	Q15113	Procollagen C-endopeptidase enhancer 1	20.8	5.7	6.5	6.25	5.8	21.6227
NCOA2	Q15596	Nuclear receptor coactivator 2	7.65	3.75	3.65	39.05	3.85	5.17673
NCOA1	Q15788	Nuclear receptor coactivator 1	9.9	6.25	6.2	69.85	8.55	10.1113
NFE2L2	Q16236	Nuclear factor erythroid 2-related factor 2	36.7	31.55	36.05	379.8	60.65	152.963
MAPK14	Q16539	Mitogen-activated protein kinase 14	11.4	6.8	33.1	320.55	9.4	34.8183
HIF1A	Q16665	Hypoxia-inducible factor 1 alpha	22.15	49.2	155.4	1018.85	107.65	372.623
CYP1B1	Q16678	Cytochrome P450 1B1	11.6	7.6	27.8	14.55	6.05	36.3371
TIAM2	Q8IVF5	T-lymphoma invasion and metastasis-inducing protein 2	3.9	2.5	2.45	3.45	2.7	3.13321
ESR2	Q92731	Estrogen receptor beta	5.2	3.3	3.15	4.4	3.35	4.0503
HAS2	Q92819	Hyaluronan synthase 2	8.2	4.95	4.35	6.15	4.75	5.83667
SIRT1	Q96EB6	NAD-dependent protein deacetylase sirtuin-1	10.1	6.4	6.5	26.1	6.85	10.6274
DCAF5	Q96JK2	DDB1- and CUL4-associated factor 5	10.05	11	22.1	11.15	10.9	16.5922
NKX3-1	Q99801	Homeobox protein Nkx-3.1	8.6	5.3	4.8	8.05	5.15	72.327
TUBB1	Q9H4B7	Tubulin beta-1 chain	16.3	6.65	5.65	32.8	6.1	8.59167
DUOX2	Q9NRD8	Dual oxidase 2	7.55	4.5	3.85	5.35	4.05	11.0628
RASSF1	Q9NS23	Ras association domain-containing protein 1	4.15	2.65	2.7	3.95	2.95	14.9763
HERC5	Q9UII4	E3 ISG15--protein ligase HERC5	20.45	9.85	9.05	37.05	9.1	23.2759
ABCG2	Q9UNQ0	ATP-binding cassette sub-family G member 2	4.7	2.9	2.9	4.05	5.1	11.4996
