# Supplementary figures and images for: Systems Pharmacology Dissecting Holistic Medicine for Treatment of Complex Diseases: An Example Using Cardiocerebrovascular Diseases Treated by TCM
Source: Hindawi journal article supplement (doi:10.1155/2015/980190), 2015-01-01

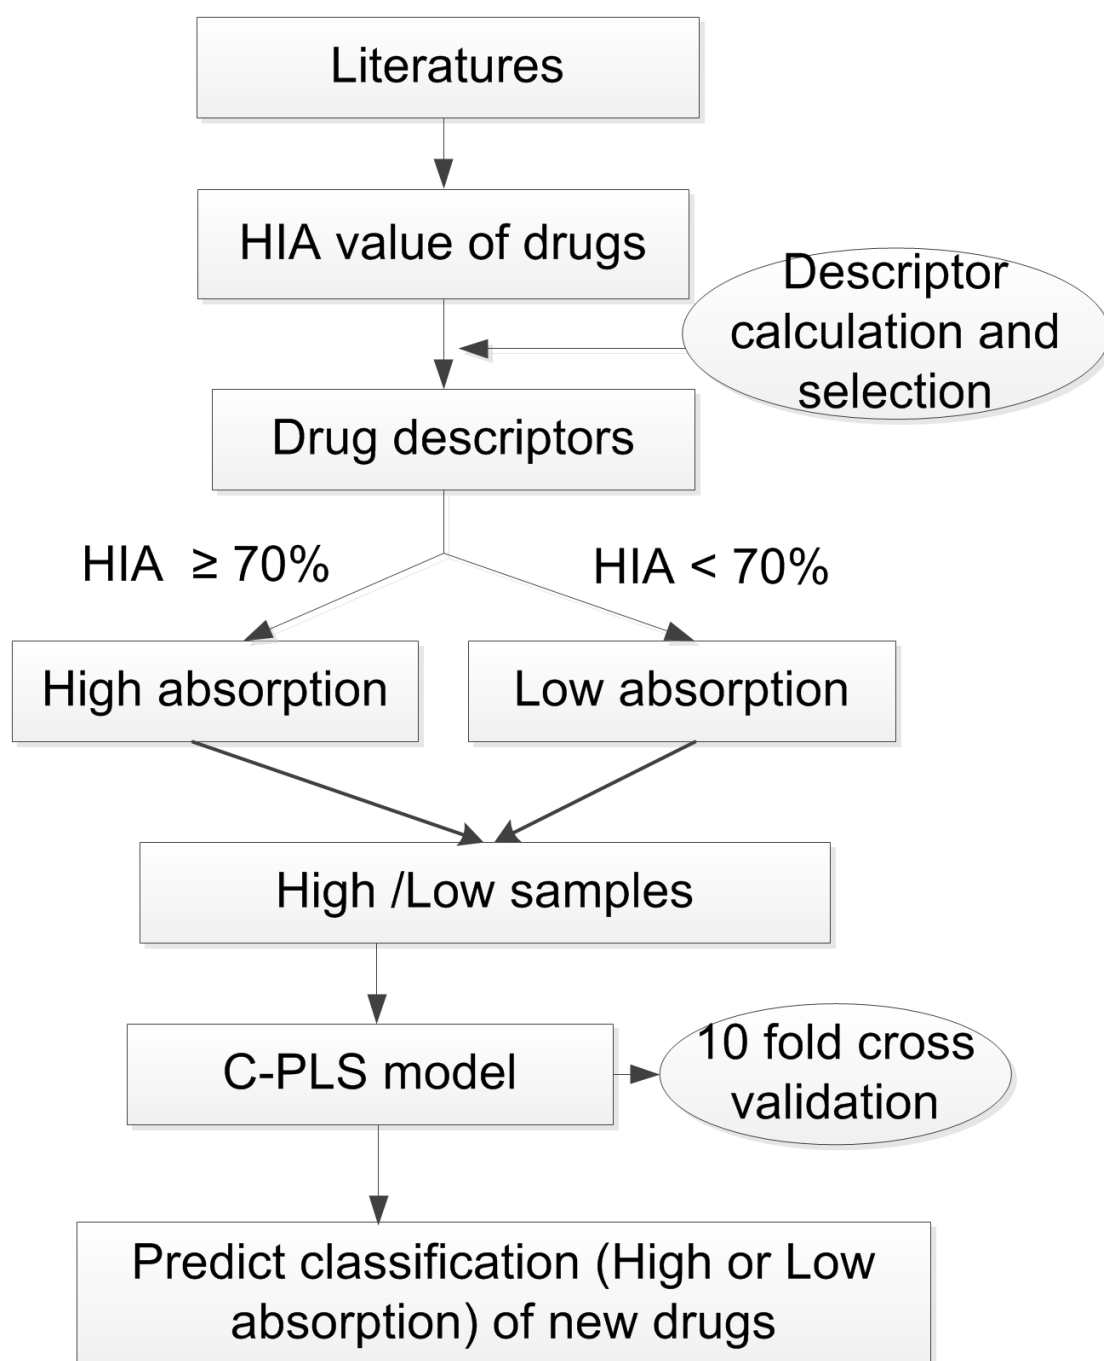

Figure S1. Workflow for PreHIA.

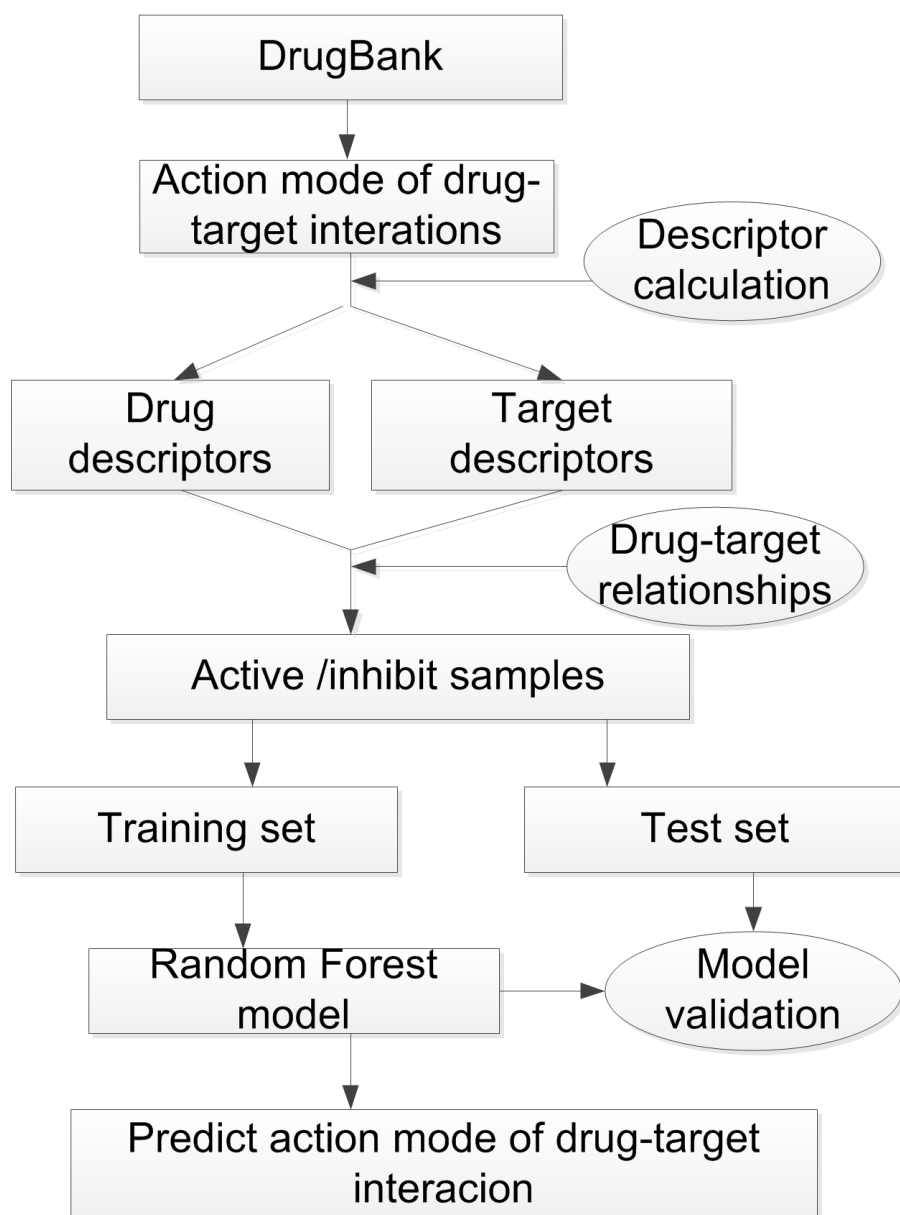

Figure S2. Workflow for PreAM.

Supplement: f1 [file 980190.f1.zip]
